# Supplementary material for: Disparities in Cardiovascular Research Output and Disease Outcomes among High-, Middle- and Low-Income Countries – An Analysis of Global Cardiovascular Publications over the Last Decade (2008–2017)
Source: PubMed Central journal article supplement (PMC7845477; doi:10.5334/gh.815), 2021-01-18
Supplement: gh-16-1-815-s1.pdf [file gh-16-1-815-s1.pdf]

## Cardiovascular publications- High Income Countries (2008-2017) (Integer counts)

| Country name        | 2008 | 2009 | 2010 | 2011 | 2012 | 2013 | 2014 | 2015 | 2016 | 2017 |
|---------------------|------|------|------|------|------|------|------|------|------|------|
| Andorra             | 0    | 0    | 0    | 0    | 0    | 0    | 0    | 0    | 0    | 1    |
| Antigua and Barbuda | 3    | 0    | 0    | 0    | 0    | 1    | 0    | 3    | 0    | 3    |
| Argentina           | 460  | 285  | 316  | 303  | 307  | 349  | 335  | 359  | 382  | 352  |
| Australia           | 1686 | 1901 | 1973 | 2175 | 2502 | 2853 | 3024 | 3041 | 3362 | 3225 |
| Austria             | 743  | 899  | 933  | 986  | 912  | 1199 | 1170 | 1144 | 1238 | 1242 |
| Bahrain             | 11   | 14   | 21   | 10   | 25   | 11   | 14   | 37   | 18   | 15   |
| Barbados            | 3    | 5    | 3    | 7    | 1    | 5    | 6    | 6    | 7    | 5    |
| Belgium             | 990  | 1057 | 1023 | 1042 | 1203 | 1283 | 1254 | 1320 | 1302 | 1370 |
| Brunei              | 3    | 1    | 1    | 2    | 5    | 1    | 7    | 7    | 10   | 3    |
| Canada              | 3024 | 3393 | 3517 | 3690 | 3886 | 4452 | 4174 | 4267 | 4590 | 4628 |
| Chile               | 136  | 124  | 159  | 179  | 166  | 245  | 251  | 295  | 262  | 277  |
| Croatia             | 107  | 199  | 166  | 150  | 171  | 167  | 168  | 192  | 198  | 163  |
| Cyprus              | 17   | 24   | 29   | 32   | 32   | 47   | 47   | 64   | 69   | 76   |
| Czech Republic      | 408  | 465  | 444  | 427  | 440  | 508  | 584  | 617  | 636  | 630  |
| Denmark             | 707  | 909  | 931  | 988  | 1143 | 1266 | 1371 | 1403 | 1512 | 1648 |
| Estonia             | 23   | 47   | 42   | 39   | 41   | 50   | 49   | 60   | 55   | 52   |
| Finland             | 573  | 609  | 592  | 591  | 577  | 599  | 684  | 682  | 702  | 711  |
| Germany             | 5135 | 5644 | 5589 | 5855 | 6112 | 6460 | 6147 | 6396 | 6486 | 6554 |
| Greece              | 1180 | 1248 | 1233 | 1098 | 1044 | 1049 | 1149 | 1172 | 1156 | 1073 |
| Hungary             | 316  | 326  | 390  | 366  | 360  | 417  | 507  | 494  | 464  | 470  |
| Iceland             | 35   | 84   | 53   | 42   | 62   | 66   | 75   | 91   | 74   | 84   |
| Ireland             | 285  | 302  | 460  | 497  | 512  | 571  | 618  | 583  | 662  | 677  |
| Israel              | 636  | 659  | 627  | 682  | 640  | 752  | 738  | 769  | 849  | 760  |
| Italy               | 3884 | 4286 | 4441 | 4502 | 4605 | 5242 | 4864 | 5392 | 5550 | 5485 |
| Japan               | 5330 | 5630 | 5614 | 6051 | 6433 | 6936 | 6372 | 5985 | 6771 | 6135 |
| Kuwait              | 49   | 47   | 37   | 38   | 36   | 33   | 31   | 71   | 40   | 40   |
| Latvia              | 13   | 40   | 23   | 42   | 39   | 57   | 40   | 49   | 52   | 50   |
| Lithuania           | 83   | 113  | 82   | 77   | 83   | 90   | 105  | 106  | 126  | 149  |
| Luxembourg          | 16   | 5    | 20   | 26   | 32   | 37   | 52   | 35   | 49   | 52   |
| Malta               | 2    | 1    | 2    | 8    | 10   | 8    | 13   | 19   | 20   | 26   |
| Netherlands         | 2484 | 3050 | 2935 | 3184 | 3191 | 3569 | 3347 | 3481 | 3468 | 3524 |
| New Zealand         | 342  | 335  | 366  | 384  | 379  | 409  | 429  | 522  | 465  | 447  |

|                      |        |       |       |       |       |       |       |       |       |       |
|----------------------|--------|-------|-------|-------|-------|-------|-------|-------|-------|-------|
| Norway               | 538    | 622   | 657   | 635   | 727   | 728   | 783   | 834   | 801   | 788   |
| Oman                 | 14     | 21    | 26    | 31    | 49    | 26    | 21    | 47    | 33    | 45    |
| Panama               | 2      | 1     | 4     | 9     | 1     | 4     | 7     | 5     | 6     | 11    |
| Poland               | 1145   | 1342  | 1340  | 1437  | 1441  | 1466  | 1313  | 1567  | 1666  | 1629  |
| Portugal             | 307    | 393   | 640   | 494   | 587   | 858   | 754   | 824   | 822   | 875   |
| Qatar                | 21     | 19    | 30    | 38    | 68    | 76    | 68    | 141   | 120   | 127   |
| Saudi Arabia         | 82     | 108   | 137   | 196   | 285   | 331   | 364   | 391   | 404   | 431   |
| Seychelles           | 3      | 5     | 2     | 2     | 4     | 8     | 0     | 1     | 1     | 3     |
| Singapore            | 285    | 285   | 342   | 382   | 401   | 550   | 496   | 558   | 650   | 663   |
| Slovakia             | 150    | 175   | 144   | 129   | 166   | 180   | 189   | 176   | 209   | 191   |
| Slovenia             | 109    | 118   | 111   | 135   | 115   | 176   | 156   | 169   | 178   | 178   |
| Spain                | 1966   | 2088  | 2333  | 2401  | 2503  | 2950  | 3004  | 3248  | 3119  | 3291  |
| Sweden               | 1210   | 1380  | 1306  | 1429  | 1489  | 1815  | 1778  | 1873  | 1912  | 2030  |
| Switzerland          | 1229   | 1350  | 1467  | 1627  | 1637  | 1767  | 1705  | 1863  | 1988  | 2077  |
| The Bahamas          | 0      | 0     | 1     | 0     | 1     | 1     | 0     | 1     | 0     | 1     |
| Trinidad and Tobago  | 3      | 6     | 4     | 5     | 6     | 6     | 8     | 5     | 4     | 6     |
| United Arab Emirates | 32     | 46    | 63    | 69    | 98    | 58    | 83    | 103   | 112   | 141   |
| United Kingdom       | 5268   | 5513  | 5641  | 6003  | 6470  | 7505  | 7029  | 7847  | 7715  | 7768  |
| United States        | 22,028 | 23618 | 23105 | 24714 | 26109 | 29136 | 26445 | 27285 | 29479 | 29150 |
| Uruguay              | 35     | 29    | 27    | 31    | 26    | 28    | 43    | 39    | 34    | 38    |
|                      | 63111  | 68821 | 69402 | 73240 | 77132 | 86401 | 81871 | 85639 | 89828 | 89370 |

## Cardiovascular publications- Upper Middle Income Countries (2008-2017)

| Country name           | 2008 | 2009 | 2010 | 2011 | 2012 | 2013 | 2014 | 2015  | 2016  | 2017  |
|------------------------|------|------|------|------|------|------|------|-------|-------|-------|
| Albania                | 13   | 13   | 26   | 10   | 17   | 22   | 29   | 28    | 30    | 23    |
| Algeria                | 22   | 40   | 37   | 31   | 33   | 36   | 39   | 34    | 49    | 50    |
| Armenia                | 40   | 36   | 41   | 11   | 22   | 20   | 21   | 15    | 15    | 32    |
| Azerbaijan             | 9    | 7    | 17   | 12   | 9    | 14   | 12   | 23    | 15    | 14    |
| Belarus                | 26   | 23   | 33   | 34   | 27   | 48   | 59   | 61    | 58    | 58    |
| Belize                 | 1    | 0    | 0    | 0    | 0    | 2    | 0    | 0     | 0     | 0     |
| Bosnia and Herzegovina | 31   | 45   | 44   | 50   | 21   | 32   | 27   | 41    | 39    | 29    |
| Botswana               | 1    | 1    | 1    | 4    | 2    | 4    | 4    | 0     | 1     | 7     |
| Brazil                 | 1507 | 1527 | 1677 | 1774 | 1743 | 2045 | 1872 | 1994  | 2067  | 2093  |
| Bulgaria               | 80   | 85   | 67   | 66   | 81   | 101  | 93   | 126   | 137   | 99    |
| China                  | 2847 | 3856 | 5297 | 5276 | 6352 | 8536 | 9213 | 10566 | 11180 | 12282 |
| Colombia               | 46   | 55   | 74   | 60   | 86   | 126  | 111  | 131   | 165   | 231   |
| Costa Rica             | 8    | 9    | 11   | 9    | 1    | 13   | 18   | 13    | 18    | 22    |
| Cuba                   | 24   | 23   | 22   | 29   | 26   | 36   | 26   | 30    | 14    | 24    |
| Dominica               | 2    | 0    | 0    | 1    | 0    | 0    | 0    | 2     | 1     | 6     |
| Dominican Republic     | 0    | 4    | 0    | 1    | 3    | 9    | 5    | 9     | 2     | 3     |
| Ecuador                | 2    | 5    | 10   | 3    | 6    | 17   | 15   | 22    | 30    | 29    |
| Equatorial Guinea      | 0    | 0    | 0    | 0    | 0    | 0    | 1    | 0     | 0     | 0     |
| Fiji                   | 2    | 1    | 0    | 1    | 2    | 1    | 2    | 2     | 6     | 4     |
| Gabon                  | 4    | 0    | 0    | 1    | 3    | 3    | 2    | 2     | 5     | 3     |
| Grenada                | 6    | 14   | 18   | 13   | 18   | 17   | 20   | 21    | 19    | 9     |
| Guatemala              | 4    | 0    | 1    | 4    | 5    | 4    | 8    | 13    | 7     | 7     |
| Guyana                 | 2    | 1    | 0    | 0    | 0    | 1    | 1    | 1     | 2     | 2     |
| Iran                   | 380  | 440  | 447  | 639  | 655  | 599  | 573  | 637   | 757   | 780   |
| Iraq                   | 13   | 11   | 13   | 12   | 17   | 23   | 23   | 23    | 22    | 26    |
| Jamaica                | 13   | 13   | 8    | 16   | 14   | 11   | 11   | 12    | 11    | 13    |
| Jordan                 | 16   | 16   | 25   | 33   | 27   | 38   | 34   | 60    | 62    | 66    |
| Kazakhstan             | 0    | 6    | 3    | 6    | 4    | 16   | 24   | 57    | 47    | 39    |
| Libya                  | 5    | 2    | 4    | 2    | 3    | 1    | 6    | 1     | 4     | 2     |
| Macedonia              | 23   | 29   | 34   | 26   | 15   | 36   | 33   | 36    | 45    | 37    |
| Malaysia               | 87   | 95   | 128  | 160  | 206  | 218  | 232  | 275   | 323   | 422   |
| Maldives               | 0    | 0    | 1    | 0    | 0    | 0    | 0    | 0     | 1     | 0     |

|                                  |      |      |       |       |       |       |       |       |       |       |
|----------------------------------|------|------|-------|-------|-------|-------|-------|-------|-------|-------|
| Marshall Islands                 | 0    | 0    | 0     | 0     | 0     | 0     | 0     | 0     | 0     | 0     |
| Mauritius                        | 2    | 0    | 2     | 1     | 1     | 2     | 3     | 5     | 1     | 2     |
| Mexico                           | 203  | 223  | 242   | 227   | 267   | 360   | 334   | 355   | 398   | 436   |
| Montenegro                       | 4    | 8    | 6     | 9     | 2     | 14    | 18    | 26    | 27    | 15    |
| Namibia                          | 0    | 0    | 0     | 0     | 1     | 1     | 1     | 2     | 2     | 1     |
| Paraguay                         | 2    | 1    | 5     | 1     | 3     | 3     | 3     | 8     | 10    | 9     |
| Peru                             | 14   | 19   | 17    | 12    | 22    | 36    | 50    | 60    | 29    | 52    |
| Romania                          | 226  | 262  | 372   | 272   | 275   | 342   | 368   | 531   | 472   | 470   |
| Russian Federation               | 852  | 887  | 958   | 942   | 964   | 986   | 1080  | 1306  | 1328  | 1418  |
| Saint Lucia                      | 0    | 0    | 0     | 0     | 0     | 0     | 0     | 0     | 0     | 0     |
| Saint Vincent and the Grenadines | 0    | 0    | 0     | 0     | 0     | 0     | 0     | 1     | 1     | 0     |
| Samoa                            | 0    | 0    | 0     | 1     | 0     | 1     | 0     | 0     | 0     | 4     |
| Serbia                           | 242  | 276  | 310   | 339   | 363   | 387   | 387   | 445   | 418   | 407   |
| South Africa                     | 178  | 195  | 177   | 188   | 238   | 248   | 285   | 302   | 375   | 338   |
| Suriname                         | 1    | 1    | 0     | 0     | 0     | 1     | 1     | 1     | 7     | 5     |
| Thailand                         | 132  | 203  | 182   | 187   | 225   | 215   | 257   | 243   | 301   | 328   |
| Tonga                            | 1    | 0    | 0     | 0     | 0     | 0     | 0     | 0     | 0     | 0     |
| Turkey                           | 1626 | 1489 | 1827  | 1840  | 1935  | 3104  | 2290  | 2453  | 2269  | 1927  |
| Turkmenistan                     | 0    | 1    | 0     | 0     | 1     | 0     | 0     | 3     | 0     | 1     |
| Venezuela                        | 54   | 49   | 67    | 32    | 27    | 48    | 49    | 42    | 31    | 31    |
|                                  | 8751 | 9971 | 12204 | 12335 | 13722 | 17777 | 17640 | 20018 | 20801 | 21856 |

Cardiovascular publications- Lower Middle Income Countries (2008-2017)

| Country name                   | 2008 | 2009 | 2010 | 2011 | 2012 | 2013 | 2014 | 2015 | 2016 | 2017 |
|--------------------------------|------|------|------|------|------|------|------|------|------|------|
| Angola                         | 1    | 2    | 0    | 1    | 2    | 5    | 5    | 5    | 5    | 8    |
| Bangladesh                     | 13   | 16   | 24   | 22   | 41   | 41   | 43   | 67   | 68   | 57   |
| Bhutan                         | 0    | 0    | 0    | 0    | 0    | 0    | 0    | 1    | 1    | 0    |
| Bolivia                        | 10   | 6    | 12   | 10   | 6    | 11   | 7    | 12   | 9    | 11   |
| Cambodia                       | 0    | 0    | 0    | 1    | 1    | 3    | 4    | 2    | 6    | 3    |
| Cameroon                       | 12   | 13   | 12   | 13   | 19   | 12   | 30   | 24   | 53   | 49   |
| Cape Verde                     | 0    | 0    | 0    | 0    | 0    | 0    | 0    | 0    | 0    | 2    |
| Congo                          | 2    | 1    | 1    | 2    | 1    | 0    | 1    | 4    | 6    | 7    |
| Cote d'Ivoire                  | 3    | 3    | 1    | 5    | 8    | 3    | 6    | 4    | 14   | 13   |
| Djibouti                       | 0    | 1    | 0    | 1    | 0    | 1    | 0    | 0    | 0    | 0    |
| Egypt                          | 142  | 216  | 269  | 271  | 314  | 356  | 383  | 464  | 515  | 596  |
| El Salvador                    | 0    | 1    | 1    | 0    | 0    | 2    | 0    | 1    | 0    | 3    |
| Federated States of Micronesia | 0    | 0    | 0    | 0    | 0    | 0    | 1    | 0    | 0    | 0    |
| Georgia                        | 30   | 39   | 25   | 30   | 12   | 20   | 28   | 20   | 22   | 24   |
| Ghana                          | 5    | 8    | 2    | 11   | 11   | 6    | 18   | 27   | 36   | 58   |
| Honduras                       | 0    | 0    | 1    | 0    | 1    | 1    | 2    | 2    | 1    | 5    |
| India                          | 758  | 793  | 850  | 973  | 1166 | 1286 | 1251 | 1231 | 1713 | 1437 |
| Indonesia                      | 48   | 54   | 50   | 54   | 70   | 67   | 228  | 162  | 314  | 416  |
| Kenya                          | 4    | 10   | 13   | 13   | 19   | 22   | 16   | 23   | 36   | 37   |
| Kiribati                       | 0    | 0    | 0    | 0    | 0    | 0    | 0    | 0    | 0    | 0    |
| Kyrgyzstan                     | 5    | 8    | 4    | 3    | 7    | 10   | 4    | 10   | 12   | 36   |
| Laos                           | 2    | 0    | 0    | 1    | 0    | 0    | 0    | 0    | 1    | 1    |
| Lesotho                        | 0    | 0    | 0    | 0    | 0    | 0    | 0    | 0    | 1    | 0    |
| Mauritania                     | 0    | 0    | 2    | 0    | 1    | 0    | 0    | 1    | 2    | 3    |
| Moldova                        | 16   | 3    | 16   | 17   | 12   | 22   | 26   | 13   | 11   | 19   |
| Mongolia                       | 2    | 3    | 5    | 4    | 4    | 12   | 11   | 14   | 18   | 19   |
| Morocco                        | 33   | 49   | 33   | 40   | 60   | 54   | 52   | 85   | 50   | 56   |
| Myanmar                        | 0    | 0    | 1    | 3    | 0    | 0    | 0    | 4    | 3    | 5    |
| Nicaragua                      | 0    | 0    | 1    | 2    | 1    | 2    | 1    | 1    | 0    | 4    |
| Nigeria                        | 71   | 65   | 66   | 68   | 103  | 88   | 100  | 97   | 134  | 139  |
| Pakistan                       | 61   | 87   | 118  | 139  | 149  | 147  | 189  | 183  | 216  | 254  |
| Papua New Guinea               | 0    | 0    | 0    | 0    | 1    | 0    | 0    | 0    | 0    | 3    |

|                       |      |      |      |      |      |      |      |      |      |      |
|-----------------------|------|------|------|------|------|------|------|------|------|------|
| Philippines           | 23   | 25   | 43   | 38   | 51   | 54   | 73   | 71   | 69   | 81   |
| Sao Tome and Principe | 0    | 0    | 0    | 0    | 0    | 0    | 0    | 0    | 0    | 2    |
| Solomon Islands       | 0    | 0    | 0    | 0    | 1    | 1    | 0    | 0    | 0    | 1    |
| Sri Lanka             | 11   | 14   | 15   | 15   | 18   | 19   | 17   | 34   | 41   | 62   |
| Sudan                 | 3    | 5    | 4    | 3    | 4    | 4    | 9    | 10   | 26   | 25   |
| Timor-Leste           | 0    | 0    | 0    | 0    | 0    | 0    | 0    | 0    | 0    | 0    |
| Tunisia               | 57   | 92   | 102  | 124  | 124  | 124  | 137  | 128  | 158  | 147  |
| Ukraine               | 99   | 99   | 123  | 89   | 101  | 146  | 173  | 242  | 234  | 221  |
| Uzbekistan            | 22   | 18   | 23   | 17   | 28   | 26   | 35   | 58   | 79   | 88   |
| Vanuatu               | 2    | 0    | 0    | 1    | 0    | 0    | 0    | 1    | 1    | 1    |
| Vietnam               | 11   | 16   | 14   | 19   | 28   | 19   | 33   | 46   | 68   | 58   |
| Zambia                | 0    | 2    | 1    | 0    | 2    | 3    | 1    | 5    | 4    | 9    |
|                       | 1446 | 1649 | 1832 | 1990 | 2366 | 2567 | 2884 | 3052 | 3927 | 3960 |

Cardiovascular publications- Low Income Countries (2008-2017)

| Country name                     | 2008 | 2009 | 2010 | 2011 | 2012 | 2013 | 2014 | 2015 | 2016 | 2017 |
|----------------------------------|------|------|------|------|------|------|------|------|------|------|
| Afghanistan                      | 1    | 0    | 2    | 1    | 1    | 0    | 3    | 3    | 2    | 3    |
| Benin                            | 2    | 1    | 3    | 3    | 5    | 3    | 4    | 3    | 8    | 12   |
| Burkina Faso                     | 1    | 0    | 3    | 2    | 1    | 3    | 4    | 7    | 8    | 7    |
| Burundi                          | 0    | 0    | 0    | 0    | 1    | 1    | 0    | 0    | 2    | 0    |
| Central African Republic         | 0    | 1    | 3    | 0    | 1    | 0    | 1    | 1    | 3    | 1    |
| Chad                             | 0    | 0    | 0    | 0    | 0    | 0    | 0    | 1    | 1    | 0    |
| Comoros                          | 1    | 0    | 0    | 0    | 0    | 0    | 0    | 0    | 0    | 0    |
| Democratic Republic of the Congo | 3    | 1    | 0    | 1    | 3    | 1    | 5    | 5    | 7    | 9    |
| Eritrea                          | 0    | 0    | 1    | 2    | 0    | 1    | 2    | 0    | 0    | 1    |
| Ethiopia                         | 2    | 3    | 6    | 4    | 6    | 8    | 13   | 19   | 21   | 43   |
| Guinea                           | 0    | 0    | 1    | 0    | 0    | 0    | 1    | 1    | 6    | 5    |
| Guinea-Bissau                    | 0    | 0    | 0    | 0    | 0    | 1    | 0    | 0    | 0    | 1    |
| Haiti                            | 1    | 1    | 3    | 1    | 1    | 1    | 4    | 2    | 3    | 3    |
| Liberia                          | 0    | 0    | 0    | 0    | 0    | 0    | 0    | 0    | 0    | 0    |
| Madagascar                       | 2    | 0    | 0    | 4    | 1    | 2    | 3    | 2    | 1    | 1    |
| Malawi                           | 3    | 1    | 3    | 4    | 8    | 3    | 4    | 11   | 14   | 11   |
| Mali                             | 0    | 1    | 1    | 0    | 2    | 0    | 0    | 1    | 5    | 1    |
| Mozambique                       | 5    | 4    | 9    | 8    | 11   | 6    | 13   | 12   | 24   | 19   |
| Nepal                            | 9    | 17   | 18   | 19   | 15   | 22   | 28   | 21   | 36   | 33   |
| Niger                            | 0    | 0    | 0    | 2    | 1    | 1    | 1    | 2    | 4    | 6    |
| North Korea                      | 1    | 0    | 0    | 0    | 0    | 1    | 0    | 1    | 2    | 2    |
| Rwanda                           | 1    | 4    | 5    | 3    | 2    | 3    | 4    | 7    | 4    | 7    |
| Senegal                          | 2    | 4    | 4    | 8    | 11   | 18   | 12   | 13   | 17   | 20   |
| Sierra Leone                     | 0    | 1    | 1    | 0    | 0    | 0    | 0    | 0    | 0    | 2    |
| South Sudan                      | 0    | 0    | 0    | 0    | 0    | 0    | 0    | 0    | 1    | 0    |
| Syria                            | 2    | 3    | 4    | 8    | 8    | 13   | 11   | 8    | 7    | 9    |
| Tajikistan                       | 1    | 1    | 0    | 0    | 1    | 2    | 0    | 1    | 0    | 0    |
| Tanzania                         | 6    | 5    | 7    | 11   | 11   | 9    | 13   | 17   | 23   | 32   |
| The Gambia                       | 1    | 3    | 2    | 1    | 0    | 3    | 1    | 1    | 0    | 2    |
| Togo                             | 1    | 0    | 1    | 3    | 2    | 3    | 1    | 6    | 6    | 4    |
| Uganda                           | 3    | 8    | 11   | 4    | 11   | 16   | 19   | 31   | 32   | 35   |
| Yemen                            | 6    | 6    | 11   | 7    | 29   | 9    | 11   | 23   | 6    | 12   |

|          |    |    |    |    |     |     |     |     |     |     |
|----------|----|----|----|----|-----|-----|-----|-----|-----|-----|
| Zimbabwe | 1  | 0  | 0  | 0  | 0   | 6   | 6   | 9   | 10  | 7   |
|          | 55 | 65 | 99 | 96 | 132 | 136 | 164 | 208 | 253 | 288 |
