# Supplementary material for: Disparities in Cardiovascular Research Output and Disease Outcomes among High-, Middle- and Low-Income Countries – An Analysis of Global Cardiovascular Publications over the Last Decade (2008–2017)
Source: PubMed Central journal article supplement (PMC7845477; doi:10.5334/gh.815), 2021-01-18
Supplement: gh-16-1-815-s2.pdf [file gh-16-1-815-s2.pdf]

| 2010                      |                  |               |                                  | 2015                  |                  |               |                                  |
|---------------------------|------------------|---------------|----------------------------------|-----------------------|------------------|---------------|----------------------------------|
| Country Name              | Fractional count | Integer count | Fractional contribution estimate | Country Name          | Fractional count | Integer count | Fractional contribution estimate |
| <b>Total</b>              | 384.0163         | 433           | 0.886874                         | <b>Total</b>          | 384.4293         | 459           | 0.837537                         |
| <b>Albania</b>            | 1                | 1             | 1                                | <b>Albania</b>        | 1                | 1             | 1                                |
| <b>Australia</b>          | 12.54286         | 14            | 0.895918                         | <b>Argentina</b>      | 4.105263         | 5             | 0.821053                         |
| <b>Austria</b>            | 4.25             | 5             | 0.85                             | <b>Australia</b>      | 6.761364         | 9             | 0.751263                         |
| <b>Bolivia</b>            | 0.166667         | 1             | 0.166667                         | <b>Austria</b>        | 6                | 6             | 1                                |
| <b>Brazil</b>             | 6.333333         | 7             | 0.904762                         | <b>Belarus</b>        | 1                | 1             | 1                                |
| <b>Cameroon</b>           | 0.2              | 1             | 0.2                              | <b>Belgium</b>        | 2.153846         | 3             | 0.717949                         |
| <b>Canada</b>             | 19.34444         | 21            | 0.921164                         | <b>Bolivia</b>        | 0.5              | 1             | 0.5                              |
| <b>Chile</b>              | 1                | 1             | 1                                | <b>Brazil</b>         | 4.24906          | 7             | 0.607009                         |
| <b>China</b>              | 34.84949         | 37            | 0.941878                         | <b>Canada</b>         | 18.77598         | 25            | 0.751039                         |
| <b>Croatia</b>            | 0.75             | 1             | 0.75                             | <b>China</b>          | 46.02976         | 48            | 0.958953                         |
| <b>Czech Republic</b>     | 1                | 1             | 1                                | <b>Croatia</b>        | 0.666667         | 1             | 0.666667                         |
| <b>Denmark</b>            | 2.142857         | 3             | 0.714286                         | <b>Czech Republic</b> | 0.125            | 1             | 0.125                            |
| <b>Egypt</b>              | 1                | 1             | 1                                | <b>Denmark</b>        | 4.125            | 5             | 0.825                            |
| <b>Finland</b>            | 2                | 2             | 1                                | <b>Egypt</b>          | 4                | 4             | 1                                |
| <b>Germany</b>            | 20.94643         | 23            | 0.910714                         | <b>Estonia</b>        | 0.375            | 1             | 0.375                            |
| <b>Greece</b>             | 7                | 7             | 1                                | <b>Finland</b>        | 1.215909         | 3             | 0.405303                         |
| <b>Hungary</b>            | 2                | 2             | 1                                | <b>Georgia</b>        | 1                | 1             | 1                                |
| <b>India</b>              | 5                | 5             | 1                                | <b>Germany</b>        | 13.90397         | 17            | 0.81788                          |
| <b>Iran</b>               | 3.595238         | 4             | 0.89881                          | <b>Ghana</b>          | 0.083333         | 1             | 0.083333                         |
| <b>Ireland</b>            | 4                | 4             | 1                                | <b>Greece</b>         | 4.833333         | 6             | 0.805556                         |
| <b>Italy</b>              | 24.24508         | 26            | 0.932503                         | <b>Hungary</b>        | 1                | 1             | 1                                |
| <b>Japan</b>              | 16               | 16            | 1                                | <b>India</b>          | 4.875            | 6             | 0.8125                           |
| <b>Jordan</b>             | 1                | 1             | 1                                | <b>Iran</b>           | 3.714286         | 4             | 0.928571                         |
| <b>Latvia</b>             | 1                | 1             | 1                                | <b>Ireland</b>        | 2.5              | 4             | 0.625                            |
| <b>Malaysia</b>           | 1                | 1             | 1                                | <b>Israel</b>         | 2                | 2             | 1                                |
| <b>Mozambique</b>         | 0.1              | 1             | 0.1                              | <b>Italy</b>          | 17.43558         | 20            | 0.871779                         |
| <b>Netherlands</b>        | 15.85186         | 20            | 0.792593                         | <b>Jamaica</b>        | 0.166667         | 1             | 0.166667                         |
| <b>Nigeria</b>            | 0.2              | 1             | 0.2                              | <b>Japan</b>          | 33.14286         | 34            | 0.97479                          |
| <b>Norway</b>             | 5                | 5             | 1                                | <b>Kuwait</b>         | 2                | 2             | 1                                |
| <b>Philippines</b>        | 1.857143         | 2             | 0.928571                         | <b>Lithuania</b>      | 1                | 1             | 1                                |
| <b>Poland</b>             | 4.580556         | 6             | 0.763426                         | <b>Mexico</b>         | 2.333333         | 3             | 0.777778                         |
| <b>Portugal</b>           | 4                | 4             | 1                                | <b>Montenegro</b>     | 0.375            | 1             | 0.375                            |
| <b>Romania</b>            | 3                | 3             | 1                                | <b>Netherlands</b>    | 14.67454         | 18            | 0.815252                         |
| <b>Russian Federation</b> | 7                | 7             | 1                                | <b>New Zealand</b>    | 0.117647         | 1             | 0.117647                         |
| <b>Serbia</b>             | 2                | 2             | 1                                | <b>Norway</b>         | 4.564286         | 6             | 0.760714                         |

|                             |          |     |          |                           |          |     |          |
|-----------------------------|----------|-----|----------|---------------------------|----------|-----|----------|
| <b>Singapore</b>            | 0.833333 | 1   | 0.833333 | <b>Pakistan</b>           | 1        | 1   | 1        |
| <b>Slovakia</b>             | 2        | 2   | 1        | <b>Peru</b>               | 1        | 1   | 1        |
| <b>South Africa</b>         | 0.2      | 1   | 0.2      | <b>Poland</b>             | 6.9      | 8   | 0.8625   |
| <b>Spain</b>                | 15.12266 | 17  | 0.889568 | <b>Portugal</b>           | 4.907895 | 6   | 0.817982 |
| <b>Sudan</b>                | 0.1      | 1   | 0.1      | <b>Qatar</b>              | 1.125    | 2   | 0.5625   |
| <b>Sweden</b>               | 4.111111 | 5   | 0.822222 | <b>Romania</b>            | 0.8      | 1   | 0.8      |
| <b>Switzerland</b>          | 2.854762 | 5   | 0.570952 | <b>Russian Federation</b> | 3.914286 | 6   | 0.652381 |
| <b>Turkey</b>               | 6.555556 | 7   | 0.936508 | <b>Saudi Arabia</b>       | 0.5      | 1   | 0.5      |
| <b>Uganda</b>               | 0.1      | 1   | 0.1      | <b>Serbia</b>             | 1.625    | 2   | 0.8125   |
| <b>Ukraine</b>              | 1.666667 | 2   | 0.833333 | <b>Singapore</b>          | 1.117647 | 2   | 0.558824 |
| <b>United Arab Emirates</b> | 1        | 1   | 1        | <b>Slovakia</b>           | 0.875    | 1   | 0.875    |
| <b>United Kingdom</b>       | 20.52035 | 27  | 0.760013 | <b>South Africa</b>       | 0.303114 | 3   | 0.101038 |
| <b>United States</b>        | 112.9959 | 126 | 0.896793 | <b>Spain</b>              | 6.897436 | 8   | 0.862179 |
|                             |          |     |          | <b>Sweden</b>             | 3.995581 | 7   | 0.570797 |
|                             |          |     |          | <b>Switzerland</b>        | 5.541667 | 8   | 0.692708 |
|                             |          |     |          | <b>The Bahamas</b>        | 1        | 1   | 1        |
|                             |          |     |          | <b>Tunisia</b>            | 1        | 1   | 1        |
|                             |          |     |          | <b>Turkey</b>             | 9.833333 | 10  | 0.983333 |
|                             |          |     |          | <b>United Kingdom</b>     | 21.56164 | 26  | 0.829294 |
|                             |          |     |          | <b>United States</b>      | 97.72902 | 112 | 0.872581 |
|                             |          |     |          | <b>Uruguay</b>            | 1        | 1   | 1        |
|                             |          |     |          | <b>Uzbekistan</b>         | 1        | 1   | 1        |

Fractional counts, integer counts and fractional contribution estimates for a sample of 383 articles each from the years 2010 and 2015. Higher fractional contribution estimates reflect a lower degree of international collaboration.
