# Supplementary material for: Disparities in Cardiovascular Research Output and Disease Outcomes among High-, Middle- and Low-Income Countries – An Analysis of Global Cardiovascular Publications over the Last Decade (2008–2017)
Source: PubMed Central journal article supplement (PMC7845477; doi:10.5334/gh.815), 2021-01-18
Supplement: gh-16-1-815-s3.pdf [file gh-16-1-815-s3.pdf]

## Age Standardized Prevalence rates- High Income countries (2008-2017)

| Country Name        | 2008     | 2009     | 2010     | 2011     | 2012     | 2013     | 2014     | 2015     | 2016     | 2017     |
|---------------------|----------|----------|----------|----------|----------|----------|----------|----------|----------|----------|
| Andorra             | 6321.428 | 6284.957 | 6263.113 | 6234.25  | 6215.724 | 6207.295 | 6206.339 | 6206.142 | 6210.602 | 6218.413 |
| Antigua and Barbuda | 6773.689 | 6764.244 | 6755.018 | 6744.45  | 6733.554 | 6720.484 | 6707.523 | 6690.243 | 6673.793 | 6656.241 |
| Argentina           | 6069.336 | 6047.143 | 6032.915 | 6023.126 | 6018.628 | 6015.386 | 6015.088 | 6018.149 | 6026.085 | 6034.071 |
| Australia           | 5076.694 | 5057.63  | 5041.988 | 5027.417 | 5013.67  | 4999.235 | 4984.761 | 4971.323 | 4958.345 | 4946.159 |
| Austria             | 6781.935 | 6782.155 | 6776.037 | 6760.394 | 6737.23  | 6710.682 | 6677.551 | 6637.691 | 6591.155 | 6545.015 |
| Bahrain             | 6718.662 | 6705.267 | 6696.164 | 6694.272 | 6692.506 | 6691.376 | 6694.269 | 6698.815 | 6704.196 | 6713.185 |
| Barbados            | 6822.593 | 6819.285 | 6816.528 | 6814.602 | 6812.634 | 6810.776 | 6807.107 | 6807.674 | 6806.288 | 6804.878 |
| Belgium             | 7350.084 | 7326.746 | 7301.942 | 7271.092 | 7231.069 | 7182.734 | 7125.089 | 7061.786 | 6992.843 | 6916.48  |
| Brunei              | 5491.805 | 5476.221 | 5457.587 | 5436.592 | 5410.632 | 5381.079 | 5350.01  | 5310.933 | 5274.016 | 5235.048 |
| Canada              | 6833.782 | 6800.386 | 6783.237 | 6774.698 | 6770.04  | 6766.084 | 6766.833 | 6767.85  | 6772.842 | 6781.297 |
| Chile               | 5145.728 | 5139.778 | 5137.554 | 5135.948 | 5138.911 | 5143.838 | 5150.483 | 5160.163 | 5170.478 | 5184.765 |
| Croatia             | 7002.215 | 6992.618 | 6984.736 | 6977.323 | 6976.286 | 6978.726 | 6984.817 | 6991.569 | 7002.892 | 7014.515 |
| Cyprus              | 5744.95  | 5717.148 | 5694.476 | 5671.836 | 5650.294 | 5627.518 | 5608.226 | 5588.09  | 5568.775 | 5551.562 |
| Czech Republic      | 8469.415 | 8514.448 | 8527.04  | 8514.683 | 8502.816 | 8490.535 | 8481.102 | 8472.446 | 8463.903 | 8457.221 |
| Denmark             | 6904.59  | 6837.479 | 6779.304 | 6728.385 | 6673.219 | 6616.79  | 6562.358 | 6507.374 | 6454.454 | 6402.488 |
| Estonia             | 6481.258 | 6452.626 | 6428.12  | 6404.203 | 6381.74  | 6356.115 | 6331.588 | 6306.859 | 6281.227 | 6256.38  |
| Finland             | 6523.975 | 6502.496 | 6483.102 | 6460.587 | 6430.223 | 6397.84  | 6360.084 | 6320.185 | 6278.363 | 6233.681 |
| Germany             | 6668.213 | 6645.517 | 6633.445 | 6629.328 | 6625.874 | 6622.065 | 6619.81  | 6616.718 | 6612.157 | 6607.237 |
| Greece              | 5887.445 | 5888.606 | 5883.439 | 5880.623 | 5877.65  | 5874.81  | 5873.705 | 5871.948 | 5870.515 | 5867.45  |
| Hungary             | 7646.162 | 7671.285 | 7673.142 | 7656.641 | 7637.167 | 7616.471 | 7595.02  | 7569.279 | 7541.271 | 7512.764 |
| Iceland             | 6257.874 | 6223.671 | 6200.645 | 6182.336 | 6162.542 | 6143.494 | 6121.634 | 6102.91  | 6085.464 | 6068.739 |
| Ireland             | 6119.984 | 6088.131 | 6062.985 | 6044.285 | 6026.351 | 6011.216 | 5996.777 | 5986.938 | 5977.351 | 5972.045 |
| Israel              | 5673.605 | 5642.668 | 5621.311 | 5604.251 | 5589.021 | 5572.204 | 5559.025 | 5545.525 | 5533.571 | 5523.235 |
| Italy               | 5971.275 | 5990.026 | 5985.165 | 5962.537 | 5936.41  | 5901.185 | 5859.333 | 5807.399 | 5750.126 | 5683.064 |
| Japan               | 5445.524 | 5439.565 | 5430.574 | 5418.709 | 5404.669 | 5388.532 | 5370.081 | 5349.325 | 5326.969 | 5302.597 |
| Kuwait              | 7263.202 | 7261.435 | 7256.019 | 7245.188 | 7228.234 | 7207.468 | 7180.971 | 7147.17  | 7112.009 | 7071.558 |
| Latvia              | 6237.94  | 6254.818 | 6264.893 | 6268.104 | 6269.868 | 6268.449 | 6264.933 | 6258.374 | 6246.267 | 6232.247 |
| Lithuania           | 6764.981 | 6799.086 | 6819.231 | 6832.368 | 6844.76  | 6857.321 | 6867.217 | 6879.24  | 6888.308 | 6892.778 |
| Luxembourg          | 8590.416 | 8472.878 | 8379.142 | 8306.971 | 8237.569 | 8169.242 | 8107.018 | 8052.479 | 8000.581 | 7955.057 |
| Malta               | 5752.053 | 5725.627 | 5707.479 | 5695.449 | 5689.536 | 5690.955 | 5699.61  | 5714.104 | 5733.489 | 5757.586 |
| Netherlands         | 6321.891 | 6297.013 | 6280.251 | 6268.692 | 6256.884 | 6242.659 | 6227.009 | 6209.753 | 6195.323 | 6178.177 |
| New Zealand         | 5056.891 | 5051.435 | 5044.973 | 5036.556 | 5027.515 | 5016.889 | 5002.961 | 4987.751 | 4969.603 | 4950.658 |

|                      |          |          |          |          |          |          |          |          |          |          |
|----------------------|----------|----------|----------|----------|----------|----------|----------|----------|----------|----------|
| Norway               | 5259.957 | 5259.209 | 5259.471 | 5260.28  | 5260.894 | 5260.176 | 5259.085 | 5257.619 | 5255.639 | 5253.583 |
| Oman                 | 8079.659 | 8095.863 | 8111.917 | 8131.303 | 8142.536 | 8132.622 | 8117.2   | 8095.53  | 8074.74  | 8044.954 |
| Panama               | 5868.333 | 5861.229 | 5856.066 | 5856.62  | 5859.152 | 5862.405 | 5867.449 | 5877.256 | 5885.434 | 5896.013 |
| Poland               | 7211.33  | 7235.914 | 7247.975 | 7249.59  | 7248.591 | 7248.39  | 7247.007 | 7246.826 | 7244.841 | 7239.072 |
| Portugal             | 5847.501 | 5758.491 | 5713.507 | 5703.122 | 5690.211 | 5678.79  | 5669.7   | 5661.571 | 5655.527 | 5651.3   |
| Qatar                | 7611.414 | 7553.849 | 7510.167 | 7477.4   | 7435.19  | 7387.123 | 7330.842 | 7267.936 | 7202.557 | 7137.34  |
| Saudi Arabia         | 7040.141 | 7059.789 | 7074.405 | 7086.81  | 7101.104 | 7117.412 | 7133.4   | 7152.263 | 7171.189 | 7191.403 |
| Seychelles           | 6316.651 | 6300.839 | 6288.502 | 6276.522 | 6265.019 | 6254.225 | 6245.06  | 6236.287 | 6229.821 | 6222.87  |
| Singapore            | 5339.045 | 5336.245 | 5331.288 | 5321.535 | 5307.25  | 5290.133 | 5269.378 | 5246.004 | 5218.858 | 5191.751 |
| Slovakia             | 8190.594 | 8247.005 | 8264.035 | 8248.802 | 8228.278 | 8204.284 | 8174.059 | 8134.881 | 8083.139 | 8019.258 |
| Slovenia             | 7041.135 | 7076.681 | 7084.974 | 7074.767 | 7065.332 | 7054.523 | 7044.684 | 7030.747 | 7014.858 | 6997.126 |
| Spain                | 5619.035 | 5586.025 | 5565.171 | 5553.086 | 5543.925 | 5537.402 | 5531.596 | 5528.372 | 5530.131 | 5532.881 |
| Sweden               | 6930.861 | 6900.552 | 6878.963 | 6866.465 | 6848.962 | 6831.318 | 6812.885 | 6793.539 | 6776.726 | 6762.51  |
| Switzerland          | 5451.553 | 5446.104 | 5444.282 | 5451.137 | 5462.831 | 5478.087 | 5496.783 | 5519.585 | 5547.312 | 5579.281 |
| The Bahamas          | 6196.924 | 6191.436 | 6186.709 | 6184.618 | 6183.137 | 6181.084 | 6179.761 | 6179.823 | 6178.123 | 6179.206 |
| Trinidad and Tobago  | 6922.264 | 6921.928 | 6920.543 | 6916.717 | 6918.054 | 6921.534 | 6925.523 | 6931.632 | 6941.604 | 6950.718 |
| United Arab Emirates | 6824.674 | 6816.54  | 6823.452 | 6834.236 | 6844.416 | 6857.135 | 6869.417 | 6885.457 | 6902.911 | 6917.231 |
| United Kingdom       | 6366.952 | 6355.234 | 6342.747 | 6328.195 | 6311.672 | 6293.083 | 6272.528 | 6250.041 | 6225.816 | 6199.858 |
| United States        | 7383.229 | 7389.988 | 7386.385 | 7374.577 | 7361.656 | 7347.756 | 7332.094 | 7315.362 | 7296.357 | 7275.8   |
| Uruguay              | 5506.761 | 5482.443 | 5466.576 | 5457.257 | 5448.268 | 5442.884 | 5439.803 | 5439.614 | 5441.745 | 5449.072 |

## Age Standardized Prevalence rates- Upper middle income countries (2008-2017)

| Country Name           | 2008     | 2009     | 2010     | 2011     | 2012     | 2013     | 2014     | 2015     | 2016     | 2017     |
|------------------------|----------|----------|----------|----------|----------|----------|----------|----------|----------|----------|
| Albania                | 8296.967 | 8288.969 | 8282.524 | 8278.839 | 8277.75  | 8272.135 | 8265.967 | 8263.655 | 8262.087 | 8261.242 |
| Algeria                | 7076.311 | 7086.684 | 7093.97  | 7096.887 | 7098.577 | 7102.313 | 7104.324 | 7105.97  | 7105.296 | 7104.67  |
| Armenia                | 6962.394 | 6964.74  | 6965.965 | 6956.914 | 6944.603 | 6926.194 | 6904.395 | 6877.18  | 6844.458 | 6808.093 |
| Azerbaijan             | 6946.502 | 6987.368 | 7004.27  | 7004.798 | 6998.239 | 6983.783 | 6963.081 | 6936.659 | 6903.93  | 6861.531 |
| Belarus                | 6760.978 | 6803.358 | 6818.226 | 6810.278 | 6791.943 | 6762.934 | 6721.049 | 6666.567 | 6598.992 | 6519.256 |
| Belize                 | 6675.521 | 6665.57  | 6658.48  | 6647.453 | 6638.234 | 6628.128 | 6619.772 | 6611.43  | 6603.623 | 6592.073 |
| Bosnia and Herzegovina | 8117.009 | 8130.505 | 8137.023 | 8138.178 | 8137.988 | 8135.629 | 8130.695 | 8124.494 | 8114.412 | 8102.041 |
| Botswana               | 6075.517 | 6082.572 | 6091.116 | 6100.692 | 6112.72  | 6127.44  | 6142.529 | 6158.26  | 6174.296 | 6192.778 |
| Brazil                 | 6032.457 | 6027.294 | 6022.583 | 6018.48  | 6016.783 | 6016.435 | 6017.009 | 6019.058 | 6021.943 | 6024.971 |
| Bulgaria               | 8890.206 | 8913.287 | 8921.93  | 8920.262 | 8910.276 | 8895.567 | 8872.514 | 8844.703 | 8808.289 | 8765.719 |
| China                  | 5364.365 | 5373.532 | 5384.046 | 5399.732 | 5423.242 | 5454.365 | 5491.162 | 5533.717 | 5580.518 | 5631.583 |
| Colombia               | 5256.888 | 5247.653 | 5239.611 | 5233.766 | 5227.243 | 5222.699 | 5218.785 | 5216.81  | 5215.112 | 5215.046 |
| Costa Rica             | 6030.808 | 6021.972 | 6013.264 | 6009.399 | 6004.821 | 6002.599 | 6000.649 | 5999.651 | 5998.481 | 5998.409 |
| Cuba                   | 5796.449 | 5804.007 | 5803.224 | 5799.203 | 5792.38  | 5783.733 | 5774.349 | 5763.15  | 5751.272 | 5734.778 |
| Dominica               | 6332.659 | 6327.743 | 6322.44  | 6320.161 | 6316.821 | 6314.497 | 6313.882 | 6311.942 | 6309.342 | 6309.539 |
| Dominican Republic     | 6220.419 | 6208.269 | 6199.259 | 6193.329 | 6186.325 | 6182.829 | 6175.918 | 6174.398 | 6171.319 | 6170.693 |
| Ecuador                | 5506.949 | 5509.369 | 5512.977 | 5515.391 | 5517.626 | 5520.496 | 5522.19  | 5524.263 | 5527.044 | 5527.312 |
| Equatorial Guinea      | 5527.028 | 5517.733 | 5512.832 | 5508.595 | 5506.036 | 5504.492 | 5504.321 | 5506.83  | 5509.559 | 5516.213 |
| Fiji                   | 7621.352 | 7609.766 | 7600.663 | 7591.047 | 7585.449 | 7578.279 | 7572.668 | 7568.537 | 7565.715 | 7565.001 |
| Gabon                  | 5917.498 | 5913.758 | 5910.498 | 5906.1   | 5899.725 | 5892.803 | 5884.212 | 5875.52  | 5865.123 | 5855.101 |
| Grenada                | 6668.592 | 6670.526 | 6673.856 | 6675.38  | 6678.855 | 6681.208 | 6684.45  | 6687.164 | 6690.553 | 6695.697 |
| Guatemala              | 5835.897 | 5841.316 | 5847.434 | 5854.464 | 5863.382 | 5874.013 | 5887.33  | 5904.236 | 5921.678 | 5941.437 |
| Guyana                 | 6586.037 | 6574.575 | 6562.977 | 6556.081 | 6546.303 | 6537.331 | 6531.531 | 6526.229 | 6522.418 | 6518.568 |
| Iran                   | 6662.766 | 6661.74  | 6662.208 | 6664.174 | 6663.443 | 6661.138 | 6657.458 | 6652.794 | 6648.468 | 6644.092 |
| Iraq                   | 8368.923 | 8353.06  | 8341.646 | 8337.878 | 8342.891 | 8356.289 | 8373.773 | 8398.798 | 8424.176 | 8455.905 |
| Jamaica                | 6347.686 | 6360.532 | 6368.183 | 6376.236 | 6387.439 | 6405.162 | 6422.929 | 6447.251 | 6472.638 | 6499.203 |
| Jordan                 | 7222.78  | 7224.435 | 7222.206 | 7215.878 | 7209.412 | 7197.473 | 7182.734 | 7166.663 | 7148.367 | 7129.453 |
| Kazakhstan             | 6927.297 | 6928.973 | 6924.723 | 6899.709 | 6851.816 | 6781.711 | 6695.754 | 6591.808 | 6471.764 | 6340.535 |
| Libya                  | 7317.308 | 7349.333 | 7371.422 | 7384.467 | 7397.743 | 7405.435 | 7412.304 | 7413.719 | 7417.101 | 7414.452 |
| Macedonia              | 7315.25  | 7311.316 | 7307.056 | 7299.57  | 7291.331 | 7283.993 | 7273.631 | 7263.923 | 7249.998 | 7236.713 |
| Malaysia               | 7375.643 | 7421.585 | 7444.036 | 7449.674 | 7455.024 | 7460.115 | 7461.98  | 7460.181 | 7456.312 | 7450.884 |
| Maldives               | 5744.659 | 5720.308 | 5700.941 | 5684.193 | 5670.076 | 5655.855 | 5642.797 | 5632.378 | 5621.644 | 5615.619 |

|                                  |          |          |          |          |          |          |          |          |          |          |
|----------------------------------|----------|----------|----------|----------|----------|----------|----------|----------|----------|----------|
| Marshall Islands                 | 7132.816 | 7128.22  | 7122.569 | 7116.257 | 7107.925 | 7096.986 | 7082.345 | 7065.623 | 7048.966 | 7027.365 |
| Mauritius                        | 6682.142 | 6662.289 | 6646.109 | 6636.198 | 6623.845 | 6612.103 | 6598.293 | 6584.922 | 6573.195 | 6560.565 |
| Mexico                           | 6062.149 | 6054.269 | 6051.31  | 6053.451 | 6059.308 | 6070.379 | 6084.632 | 6102.889 | 6124.966 | 6150.865 |
| Montenegro                       | 7349.116 | 7343.082 | 7333.78  | 7328.724 | 7326.164 | 7323.979 | 7323.736 | 7327.205 | 7329.207 | 7333.665 |
| Namibia                          | 5975.998 | 5958.593 | 5945.137 | 5931.289 | 5918.88  | 5905.948 | 5893.8   | 5882.532 | 5870.86  | 5861.351 |
| Paraguay                         | 6650.668 | 6642.29  | 6630.319 | 6621.73  | 6614.209 | 6603.588 | 6594.888 | 6585.017 | 6576.537 | 6567.211 |
| Peru                             | 5551.773 | 5560.179 | 5569.785 | 5577.609 | 5587.839 | 5597.291 | 5610.18  | 5621.774 | 5637.021 | 5651.762 |
| Romania                          | 7183.169 | 7182.295 | 7174.631 | 7162.008 | 7148.501 | 7133.375 | 7116.254 | 7097.868 | 7075.905 | 7052.479 |
| Russian Federation               | 6249.516 | 6265.815 | 6280.031 | 6294.204 | 6309.645 | 6326.076 | 6343.361 | 6360.935 | 6379.316 | 6398.925 |
| Saint Lucia                      | 6722.732 | 6708.77  | 6698.908 | 6691.94  | 6683.085 | 6674.613 | 6664.665 | 6653.029 | 6644.57  | 6635.405 |
| Saint Vincent and the Grenadines | 6894.084 | 6893.105 | 6888.713 | 6885.138 | 6880.328 | 6876.035 | 6871.113 | 6863.944 | 6858.476 | 6853.271 |
| Samoa                            | 7223.466 | 7218.89  | 7212.692 | 7208.621 | 7206.08  | 7204.236 | 7204.473 | 7204.653 | 7203.811 | 7202.885 |
| Serbia                           | 7278.256 | 7277.737 | 7271.333 | 7255.163 | 7230.596 | 7196.824 | 7155.152 | 7107.119 | 7051.901 | 6991.897 |
| South Africa                     | 6211.448 | 6203.032 | 6193.719 | 6182.128 | 6167.664 | 6150.042 | 6130.813 | 6109.34  | 6085.391 | 6059.287 |
| Suriname                         | 6496.053 | 6504.696 | 6513.706 | 6522.516 | 6532.504 | 6542.55  | 6551.721 | 6562.911 | 6575.013 | 6587.416 |
| Thailand                         | 6429.244 | 6409.555 | 6398.217 | 6392.169 | 6387.677 | 6387.259 | 6390.65  | 6397.143 | 6405.905 | 6420.71  |
| Tonga                            | 7771.999 | 7767.105 | 7765.372 | 7761.567 | 7761.421 | 7762.337 | 7768.056 | 7773.024 | 7779.144 | 7785.939 |
| Turkey                           | 6712.978 | 6688.184 | 6669.63  | 6657.458 | 6647.55  | 6637.804 | 6632.719 | 6631.168 | 6632.135 | 6635.768 |
| Turkmenistan                     | 6477.902 | 6482.918 | 6486.978 | 6488.395 | 6489.211 | 6487.708 | 6485.232 | 6480.332 | 6471.235 | 6461.439 |
| Venezuela                        | 5036.356 | 5034.037 | 5033.137 | 5034.342 | 5038.768 | 5044.907 | 5054.284 | 5062.65  | 5073.744 | 5087.219 |

## Age Standardized Prevalence rates- Lower middle Income countries (2008-2017)

| Country Name                   | 2008     | 2009     | 2010     | 2011     | 2012     | 2013     | 2014     | 2015     | 2016     | 2017     |
|--------------------------------|----------|----------|----------|----------|----------|----------|----------|----------|----------|----------|
| Angola                         | 5653.157 | 5660.875 | 5664.715 | 5665.099 | 5662.071 | 5659.263 | 5653.646 | 5645.527 | 5637.108 | 5628.759 |
| Bangladesh                     | 6122.398 | 6158.976 | 6186.502 | 6206.76  | 6227.629 | 6245.536 | 6263.34  | 6276.915 | 6288.064 | 6296.294 |
| Bhutan                         | 5462.703 | 5467.767 | 5471.147 | 5475.379 | 5479.738 | 5484.097 | 5488.964 | 5495.351 | 5500.545 | 5506.811 |
| Bolivia                        | 4888.743 | 4903.566 | 4915.556 | 4926.741 | 4943.41  | 4963.195 | 4985.699 | 5008.571 | 5032.878 | 5058.554 |
| Cambodia                       | 5638.46  | 5628.874 | 5621.319 | 5611.634 | 5601.168 | 5591.89  | 5582.627 | 5569.191 | 5557.954 | 5546.32  |
| Cameroon                       | 5855.263 | 5851.635 | 5843.558 | 5833.941 | 5821.153 | 5803.66  | 5785.456 | 5763.081 | 5737.654 | 5712.38  |
| Cape Verde                     | 6659.099 | 6655.734 | 6649.953 | 6644.824 | 6641.049 | 6636.909 | 6633.733 | 6630.407 | 6628.101 | 6625.589 |
| Congo                          | 5834.78  | 5840.659 | 5838.149 | 5832.06  | 5821.334 | 5813.969 | 5801.483 | 5787.435 | 5772.838 | 5756.164 |
| Cote d'Ivoire                  | 6346.705 | 6333.83  | 6321.798 | 6307.425 | 6293.998 | 6278.214 | 6262.604 | 6244.934 | 6225.221 | 6205.782 |
| Djibouti                       | 6031.069 | 6046.927 | 6055.902 | 6060.718 | 6067.117 | 6071.347 | 6071.84  | 6073.818 | 6070.244 | 6067.924 |
| Egypt                          | 7684.649 | 7724.221 | 7747.216 | 7757.06  | 7765.685 | 7769.89  | 7771.683 | 7770.541 | 7763.233 | 7751.845 |
| El Salvador                    | 6136.388 | 6139.81  | 6143.183 | 6147.916 | 6156.608 | 6166.827 | 6180.813 | 6196.15  | 6213.254 | 6227.339 |
| Federated States of Micronesia | 6967.005 | 6967.311 | 6968.686 | 6967.25  | 6967.171 | 6968.433 | 6971.175 | 6974.854 | 6978.365 | 6983.47  |
| Georgia                        | 6907.538 | 6937.519 | 6957.066 | 6972.468 | 6989.78  | 7010.879 | 7031.659 | 7056.661 | 7082.525 | 7106.411 |
| Ghana                          | 6259.774 | 6258.767 | 6254.943 | 6247.067 | 6236.847 | 6223.304 | 6208.02  | 6186.701 | 6166.347 | 6141.372 |
| Honduras                       | 5880.481 | 5880.341 | 5880.149 | 5880.479 | 5882.818 | 5883.129 | 5885.529 | 5886.582 | 5890.125 | 5890.918 |
| India                          | 5228.651 | 5224.479 | 5220.204 | 5216.875 | 5215.119 | 5214.034 | 5213.659 | 5214.005 | 5214.094 | 5214.161 |
| Indonesia                      | 6038.655 | 6047.038 | 6052.053 | 6053.191 | 6051.983 | 6048.141 | 6042.089 | 6032.882 | 6022.942 | 6011.184 |
| Kenya                          | 5985.309 | 5974.316 | 5965.83  | 5959.492 | 5952.589 | 5945.666 | 5939.522 | 5934.313 | 5930.013 | 5926.915 |
| Kiribati                       | 7396.226 | 7385.091 | 7375.353 | 7364.265 | 7359.074 | 7354.293 | 7351.483 | 7347.639 | 7348.007 | 7346.368 |
| Kyrgyzstan                     | 6184.881 | 6182.372 | 6176.097 | 6164.784 | 6143.729 | 6119.853 | 6092.742 | 6056.783 | 6020.548 | 5977.777 |
| Laos                           | 6273.307 | 6265.884 | 6254.451 | 6236.868 | 6215.353 | 6190.146 | 6159.565 | 6128.503 | 6090.939 | 6049.967 |
| Lesotho                        | 5982.736 | 6002.574 | 6014.906 | 6023.254 | 6029.838 | 6034.939 | 6038.873 | 6041.847 | 6041.652 | 6040.686 |
| Mauritania                     | 6147.971 | 6147.847 | 6147.148 | 6144.198 | 6142.404 | 6139.242 | 6140.026 | 6137.051 | 6134.386 | 6129.853 |
| Moldova                        | 5934.214 | 5946.679 | 5956.935 | 5962.909 | 5968.986 | 5972.691 | 5976.65  | 5978.55  | 5977.493 | 5976.187 |
| Mongolia                       | 6811.108 | 6809.551 | 6806.869 | 6804.708 | 6800.443 | 6795.3   | 6790.753 | 6780.351 | 6770.45  | 6760.113 |
| Morocco                        | 7693.097 | 7694.466 | 7691.703 | 7685.319 | 7676.62  | 7665.282 | 7653.446 | 7636.542 | 7620.933 | 7602.36  |
| Myanmar                        | 5534.708 | 5528.093 | 5517.886 | 5507.503 | 5497.829 | 5486.79  | 5477.802 | 5467.124 | 5455.291 | 5442.518 |
| Nicaragua                      | 5875.331 | 5876.19  | 5875.657 | 5876.229 | 5879.033 | 5882.74  | 5884.494 | 5886.439 | 5890.917 | 5894.288 |
| Niger                          | 5603.004 | 5596.555 | 5591.527 | 5589.938 | 5591.79  | 5593.502 | 5597.563 | 5603.439 | 5611.245 | 5618.176 |
| Pakistan                       | 6643.466 | 6643.055 | 6641.989 | 6637.492 | 6630.551 | 6621.42  | 6611.33  | 6597.953 | 6583.643 | 6566.162 |
| Papua New Guinea               | 7054.495 | 7046.92  | 7039.323 | 7030.035 | 7017.815 | 7003.001 | 6986.53  | 6965.967 | 6946.024 | 6924.594 |

|                       |          |          |          |          |          |          |          |          |          |          |
|-----------------------|----------|----------|----------|----------|----------|----------|----------|----------|----------|----------|
| Philippines           | 5916.699 | 5914.73  | 5911.17  | 5906.186 | 5898.974 | 5886.475 | 5875.453 | 5859.779 | 5844.611 | 5824.828 |
| Sao Tome and Principe | 6763.159 | 6753.086 | 6741.112 | 6729.74  | 6718.833 | 6709.439 | 6700.202 | 6692.4   | 6684.986 | 6673.37  |
| Solomon Islands       | 6639.025 | 6641.333 | 6643.061 | 6646.294 | 6655.04  | 6663.818 | 6679.832 | 6695.94  | 6715.39  | 6736.505 |
| Sri Lanka             | 5760.553 | 5771.039 | 5771.115 | 5763.848 | 5749.1   | 5727.525 | 5703.697 | 5672.67  | 5638.046 | 5600.323 |
| Sudan                 | 7338.313 | 7345.08  | 7346.474 | 7344.481 | 7342.958 | 7338.201 | 7331.324 | 7323.304 | 7313.006 | 7300.844 |
| Timor-Leste           | 6049.537 | 6057.649 | 6060.315 | 6059.379 | 6058.393 | 6056.652 | 6053.177 | 6048.549 | 6043.528 | 6036.442 |
| Tunisia               | 6575.643 | 6579.17  | 6580.264 | 6580.934 | 6580.97  | 6581.155 | 6581.492 | 6577.746 | 6576.629 | 6575.567 |
| Ukraine               | 6211.035 | 6226.753 | 6238.663 | 6247.641 | 6257.453 | 6265.425 | 6276.668 | 6286.345 | 6294.842 | 6302.629 |
| Uzbekistan            | 6739.024 | 6768.338 | 6784.525 | 6781.939 | 6764.527 | 6732.975 | 6686.433 | 6627.421 | 6555.718 | 6478.419 |
| Vanuatu               | 7346.905 | 7333.654 | 7324.386 | 7322.157 | 7323.193 | 7325.934 | 7333.408 | 7341.492 | 7356.469 | 7368.23  |
| Vietnam               | 5543.751 | 5531.408 | 5522.582 | 5514.87  | 5505.283 | 5493.75  | 5479.847 | 5466.008 | 5449.662 | 5432.397 |
| Zambia                | 5848.281 | 5849.292 | 5850.528 | 5850.108 | 5848.852 | 5848.178 | 5846.619 | 5842.304 | 5838.704 | 5835.719 |

## Age Standardized Prevalence rates- Low income countries (2008-2017)

| Country Name                     | 2008     | 2009     | 2010     | 2011     | 2012     | 2013     | 2014     | 2015     | 2016     | 2017     |
|----------------------------------|----------|----------|----------|----------|----------|----------|----------|----------|----------|----------|
| Afghanistan                      | 7971.819 | 7986.715 | 7993.534 | 7995.353 | 8001.677 | 8009.141 | 8018.332 | 8026.576 | 8033.347 | 8037.174 |
| Benin                            | 5685.326 | 5679.883 | 5673.66  | 5668.507 | 5662.392 | 5656.615 | 5650.563 | 5644.911 | 5637.402 | 5630.425 |
| Burkina Faso                     | 5740.788 | 5723.941 | 5711.686 | 5705.089 | 5697.858 | 5692.638 | 5687.332 | 5684.545 | 5681.542 | 5681.424 |
| Burundi                          | 6020.237 | 6012.858 | 6011.11  | 6009.57  | 6008.198 | 6009.791 | 6009.206 | 6011.844 | 6016.153 | 6021.371 |
| Central African Republic         | 5204.308 | 5211.629 | 5215.716 | 5220.006 | 5225.973 | 5231.488 | 5238.72  | 5247.747 | 5256.792 | 5263.58  |
| Chad                             | 6041.041 | 6051.223 | 6055.017 | 6057.404 | 6057.082 | 6053.545 | 6049.898 | 6044.44  | 6038.743 | 6029.445 |
| Comoros                          | 6096.298 | 6084.251 | 6069.746 | 6056.595 | 6045.376 | 6034.765 | 6022.198 | 6010.278 | 5999.588 | 5989.314 |
| Democratic Republic of the Congo | 5369.225 | 5363.875 | 5362.413 | 5363.229 | 5365.568 | 5368.258 | 5371.113 | 5377.262 | 5384.316 | 5390.711 |
| Eritrea                          | 5328.161 | 5322.833 | 5315.562 | 5310.981 | 5308.91  | 5305.188 | 5305.602 | 5306.255 | 5303.574 | 5303.149 |
| Ethiopia                         | 5495.013 | 5494.806 | 5493.745 | 5490.117 | 5485.472 | 5482.105 | 5478.661 | 5474.766 | 5470.426 | 5466.321 |
| Guinea                           | 5852.47  | 5857.394 | 5859.749 | 5861.022 | 5864.686 | 5866.021 | 5866.246 | 5865.576 | 5864.725 | 5863.43  |
| Guinea-Bissau                    | 5856.861 | 5850.453 | 5844.769 | 5837.066 | 5827.893 | 5819.673 | 5810.225 | 5799.225 | 5788.928 | 5777.6   |
| Haiti                            | 6472.424 | 6465     | 6459.202 | 6459.093 | 6462.624 | 6469.211 | 6481.549 | 6497.158 | 6515.181 | 6536.215 |
| Liberia                          | 6103.197 | 6104.936 | 6105.22  | 6103.261 | 6105.52  | 6107.917 | 6112.39  | 6115.364 | 6118.565 | 6122.163 |
| Madagascar                       | 6431.631 | 6417.335 | 6403.391 | 6388.954 | 6373.527 | 6358.029 | 6343.149 | 6328.653 | 6313.608 | 6297.986 |
| Malawi                           | 6274.885 | 6262.547 | 6252.154 | 6243.561 | 6234.469 | 6225.703 | 6219.303 | 6211.495 | 6204.206 | 6200.508 |
| Mali                             | 5653.83  | 5651.725 | 5647.648 | 5643.06  | 5640.666 | 5636.042 | 5628.931 | 5623.293 | 5619.453 | 5613.281 |
| Mozambique                       | 6329.728 | 6335.109 | 6338.588 | 6340.481 | 6342.96  | 6344.656 | 6347.033 | 6346.719 | 6347.58  | 6347.417 |
| Nepal                            | 5726.979 | 5725.936 | 5720.495 | 5715.628 | 5710.6   | 5704.361 | 5699.125 | 5693.421 | 5686.02  | 5679.757 |
| Niger                            | 5603.004 | 5596.555 | 5591.527 | 5589.938 | 5591.79  | 5593.502 | 5597.563 | 5603.439 | 5611.245 | 5618.176 |
| North Korea                      | 5759.96  | 5754.892 | 5752.748 | 5752.05  | 5753.649 | 5754.66  | 5755.244 | 5755.996 | 5756.162 | 5757.801 |
| Rwanda                           | 5309.251 | 5304.407 | 5301.936 | 5302.04  | 5302.578 | 5303.973 | 5306.783 | 5309.034 | 5314.605 | 5319.706 |
| Senegal                          | 6001.408 | 5998.731 | 5994.655 | 5991.958 | 5992.194 | 5995.643 | 6001.117 | 6010.086 | 6017.075 | 6027.853 |
| Sierra Leone                     | 6614.836 | 6615.395 | 6612.346 | 6605.924 | 6597.693 | 6584.453 | 6568.647 | 6550.445 | 6531.096 | 6509.989 |
| South Sudan                      | 5877.78  | 5875.268 | 5874.311 | 5870.698 | 5869.218 | 5867.424 | 5865.213 | 5865.28  | 5863.175 | 5864.589 |
| Syria                            | 7063.032 | 7066.963 | 7071.921 | 7072.358 | 7075.612 | 7080.123 | 7086.473 | 7093.644 | 7102.444 | 7108.29  |
| Tajikistan                       | 5906.722 | 5904.665 | 5902.649 | 5902.464 | 5903.548 | 5906.426 | 5913.282 | 5921.781 | 5931.65  | 5942.454 |
| Tanzania                         | 5511.741 | 5515.697 | 5520.01  | 5525.433 | 5531.983 | 5537.41  | 5544.659 | 5550.32  | 5557.561 | 5567.162 |
| The Gambia                       | 6037.084 | 6042.072 | 6042.799 | 6041.792 | 6039.556 | 6035.317 | 6029.916 | 6026.142 | 6019.292 | 6013.607 |
| Togo                             | 6007.513 | 5999.203 | 5992.422 | 5984.309 | 5975.763 | 5965.787 | 5954.671 | 5942.959 | 5931.475 | 5917.945 |
| Uganda                           | 5794.162 | 5779.951 | 5765.726 | 5753.47  | 5742.027 | 5728.937 | 5716.845 | 5704.957 | 5691.967 | 5679.597 |
| Yemen                            | 7317.481 | 7319.545 | 7318.387 | 7311.436 | 7303.854 | 7295.549 | 7285.218 | 7272.967 | 7257.932 | 7239.93  |

|          |          |          |          |          |          |          |          |          |          |          |
|----------|----------|----------|----------|----------|----------|----------|----------|----------|----------|----------|
| Zimbabwe | 6228.634 | 6214.878 | 6203.735 | 6195.003 | 6178.548 | 6158.017 | 6136.331 | 6111.535 | 6084.999 | 6056.156 |
|----------|----------|----------|----------|----------|----------|----------|----------|----------|----------|----------|
