# Supplementary material for: Disparities in Cardiovascular Research Output and Disease Outcomes among High-, Middle- and Low-Income Countries – An Analysis of Global Cardiovascular Publications over the Last Decade (2008–2017)
Source: PubMed Central journal article supplement (PMC7845477; doi:10.5334/gh.815), 2021-01-18
Supplement: gh-16-1-815-s4.pdf [file gh-16-1-815-s4.pdf]

### Age Standardized DALYs- High Income countries (2008-2017)

| Country Name        | 2008     | 2009     | 2010     | 2011     | 2012     | 2013     | 2014     | 2015     | 2016     | 2017     |
|---------------------|----------|----------|----------|----------|----------|----------|----------|----------|----------|----------|
| Andorra             | 2130.399 | 2110.288 | 2085.724 | 2059.535 | 2045.27  | 2033.464 | 2019.264 | 1997.875 | 1990.093 | 1980.266 |
| Antigua and Barbuda | 3987.829 | 3913.821 | 3878.583 | 3847.095 | 3807.688 | 3767.584 | 3772.175 | 3714.168 | 3690.619 | 3669.008 |
| Argentina           | 4039.036 | 3985.67  | 3895.332 | 3842.03  | 3786.6   | 3720.58  | 3604.526 | 3564.017 | 3577.366 | 3561.935 |
| Australia           | 2078.141 | 1999.92  | 1922.071 | 1866.971 | 1783.289 | 1742.629 | 1749.613 | 1751.732 | 1755.396 | 1783.149 |
| Austria             | 2734.72  | 2744.94  | 2659.001 | 2581.419 | 2506.982 | 2442.858 | 2381.08  | 2349.421 | 2283.574 | 2268.608 |
| Bahrain             | 3860.784 | 3597.936 | 3433.544 | 3329.557 | 3212.317 | 3091.364 | 3005.833 | 2985.487 | 2960.784 | 2948.826 |
| Barbados            | 3379.567 | 3273.316 | 3225.728 | 3216.552 | 3173.22  | 3183.588 | 3213.713 | 3219.817 | 3216.833 | 3217.803 |
| Belgium             | 2500.318 | 2421.237 | 2325.339 | 2284.227 | 2245.999 | 2189.58  | 2088.955 | 2080.808 | 2021.268 | 2000.58  |
| Brunei              | 4409.068 | 4346.354 | 4268.048 | 4227.914 | 4185.387 | 4146.455 | 4104.763 | 4067.805 | 4045.118 | 4035.761 |
| Canada              | 2245.075 | 2160.807 | 2071.859 | 2001.312 | 1995.102 | 1954.365 | 1993.993 | 2011.555 | 1985.403 | 1977.788 |
| Chile               | 2613.99  | 2661.186 | 2639.301 | 2537.574 | 2486.163 | 2467.904 | 2397.551 | 2375.402 | 2367.115 | 2384.502 |
| Croatia             | 5383.778 | 5039.911 | 4864.048 | 4692.348 | 4544.389 | 4273.519 | 4246.371 | 4332.199 | 4061.756 | 4010.986 |
| Cyprus              | 3346.121 | 3172.409 | 2992.028 | 2830.577 | 2705.704 | 2634.453 | 2583.739 | 2542.652 | 2505.897 | 2497.136 |
| Czech Republic      | 4760.321 | 4610.091 | 4463.997 | 4373.877 | 4261.861 | 4135.7   | 3945.833 | 3907.757 | 3824.329 | 3802.516 |
| Denmark             | 2481.965 | 2394.93  | 2288.436 | 2142.727 | 2050.622 | 1981.893 | 1901.313 | 1859.592 | 1869.986 | 1883.958 |
| Estonia             | 6288.946 | 5923.669 | 5404.793 | 5217.373 | 5066.743 | 4791.464 | 4689.405 | 4425.416 | 4361.108 | 4320.048 |
| Finland             | 3212.731 | 3121.714 | 3033.874 | 2914.416 | 2825.213 | 2742.902 | 2629.459 | 2538.807 | 2545.572 | 2564.344 |
| Germany             | 2886.989 | 2831.069 | 2749.075 | 2674.127 | 2606.539 | 2608.402 | 2513.912 | 2562.359 | 2597.752 | 2570.201 |
| Greece              | 3530.114 | 3426.668 | 3311.722 | 3287.476 | 3259.634 | 3081.72  | 2976.009 | 2978.172 | 2991.893 | 3000.977 |
| Hungary             | 6133.835 | 6061.243 | 5879.041 | 5708.331 | 5603.042 | 5373.042 | 5241.016 | 5438.22  | 5087.739 | 4949.813 |
| Iceland             | 2213.465 | 2176.343 | 2089.476 | 2016.459 | 1993.717 | 1969.655 | 1953.652 | 1943.208 | 1915.531 | 1930.134 |
| Ireland             | 2717.987 | 2666.946 | 2379.051 | 2364.395 | 2325.913 | 2249.253 | 2171.03  | 2129.641 | 2081.659 | 2074.523 |
| Israel              | 1978.487 | 1860.013 | 1787.25  | 1775.655 | 1717.95  | 1684.911 | 1637.58  | 1636.652 | 1597.255 | 1583.888 |
| Italy               | 2188.527 | 2140.512 | 2050.637 | 2026.67  | 1988.734 | 1924.404 | 1865.039 | 1882.206 | 1799.402 | 1763.827 |
| Japan               | 1906.018 | 1865.696 | 1842.153 | 1826.401 | 1768.099 | 1724.858 | 1681.351 | 1629.318 | 1621.795 | 1619.132 |
| Kuwait              | 4320.47  | 4029.702 | 3663.205 | 3416.754 | 3340.497 | 3224.856 | 3096.804 | 3062.098 | 3052.013 | 3047.557 |
| Latvia              | 8349.646 | 7880.479 | 7735.085 | 7300.668 | 7075.942 | 7032.34  | 6781.828 | 6574.697 | 6543.053 | 6475.453 |
| Lithuania           | 7650.342 | 6883.059 | 6796.702 | 6637.49  | 6492.432 | 6468.548 | 6159.147 | 6158.192 | 6096.463 | 6028.354 |
| Luxembourg          | 2735.673 | 2637.355 | 2557.694 | 2477.122 | 2405.681 | 2321.362 | 2265.764 | 2224.198 | 2188.668 | 2171.061 |
| Malta               | 3129.658 | 3005.286 | 2920.738 | 2841.7   | 2793.671 | 2688.842 | 2635.301 | 2631.583 | 2694.622 | 2719.043 |
| Netherlands         | 2249.042 | 2134.877 | 2053.233 | 1990.308 | 1943.666 | 1877.686 | 1805.887 | 1801.215 | 1797.742 | 1804.227 |
| New Zealand         | 2575.803 | 2476.327 | 2376.344 | 2328.508 | 2272.795 | 2206.271 | 2190.2   | 2158.076 | 2167.227 | 2175.198 |

|                      |          |          |          |          |          |          |          |          |          |          |
|----------------------|----------|----------|----------|----------|----------|----------|----------|----------|----------|----------|
| Norway               | 2352.972 | 2286.575 | 2217.031 | 2198.347 | 2057.798 | 2032.783 | 1924.55  | 1845.143 | 1834.627 | 1846.367 |
| Oman                 | 6661.195 | 6465.668 | 6482.093 | 6516.378 | 6302.938 | 5994.97  | 5852.419 | 5739.889 | 5468.025 | 5411.323 |
| Panama               | 2789.276 | 2797.869 | 2740.4   | 2724.303 | 2707.827 | 2673.634 | 2623.951 | 2552.69  | 2507.685 | 2479.141 |
| Poland               | 5253.327 | 5096.979 | 4834.138 | 4684.64  | 4602.415 | 4433.442 | 4216.318 | 4215.277 | 4135.02  | 4072.308 |
| Portugal             | 2626.757 | 2518.994 | 2406.519 | 2300.127 | 2225.542 | 2159.668 | 2109.237 | 2033.098 | 2050.434 | 2071.535 |
| Qatar                | 4205.106 | 3984.348 | 3769.604 | 3607.811 | 3471.489 | 3348.407 | 3236.74  | 3139.224 | 3072.611 | 3054.086 |
| Saudi Arabia         | 5886.563 | 5941.325 | 5954.681 | 5892.624 | 5764.98  | 5605.35  | 5417.58  | 5244.715 | 5095.057 | 4967.518 |
| Seychelles           | 5463.882 | 5404.456 | 5307.417 | 5227.719 | 5174.637 | 5080.393 | 5029.758 | 5017.729 | 4975.179 | 4945.03  |
| Singapore            | 2747.392 | 2545.459 | 2445.412 | 2383.643 | 2297.538 | 2208.327 | 2128.868 | 2060.582 | 1990.124 | 1966.682 |
| Slovakia             | 6382.382 | 6164.226 | 5859.091 | 5656.617 | 5416.871 | 5211.57  | 5067.507 | 5119.744 | 4916.35  | 4836.709 |
| Slovenia             | 3177.315 | 3043.589 | 2914.396 | 2793.919 | 2761.285 | 2680.114 | 2514.409 | 2546.068 | 2506.117 | 2501.771 |
| Spain                | 2205.889 | 2092.165 | 2002.818 | 1955.279 | 1907.273 | 1838.694 | 1806.606 | 1824.561 | 1769.339 | 1745.554 |
| Sweden               | 2711.602 | 2639.793 | 2517.223 | 2469.848 | 2387.923 | 2331.377 | 2265.783 | 2210.644 | 2159.107 | 2151.729 |
| Switzerland          | 1897.005 | 1871.751 | 1807.644 | 1731.515 | 1706.684 | 1674.121 | 1608.608 | 1570.152 | 1523.228 | 1504.542 |
| The Bahamas          | 4965.329 | 5019.055 | 5007.42  | 4996.716 | 4908.869 | 4872.189 | 4884.796 | 4907.17  | 4896.873 | 4882.408 |
| Trinidad and Tobago  | 5286.085 | 5000.526 | 4753.599 | 4497.966 | 4463.304 | 4556.051 | 4578.549 | 4591.342 | 4677.145 | 4707.153 |
| United Arab Emirates | 6071.009 | 6048.697 | 6058.102 | 6089.139 | 6113.196 | 6117.078 | 6123.188 | 6116.75  | 6109.181 | 6084.02  |
| United Kingdom       | 2685.33  | 2544.484 | 2443.233 | 2323.348 | 2246.507 | 2231.952 | 2181.651 | 2191.079 | 2193.028 | 2201.994 |
| United States        | 3262.066 | 3177.392 | 3068.427 | 3049.103 | 3007.282 | 2984.585 | 2974.896 | 2979.461 | 3017.412 | 3029.691 |
| Uruguay              | 3469.016 | 3311.896 | 3240.613 | 3235.428 | 3177.679 | 3084.274 | 2975.69  | 2972.3   | 2973.863 | 2988.339 |

## Age Standardized DALYs- Upper middle Income countries (2008-2017)

| Country Name           | 2008     | 2009     | 2010     | 2011     | 2012     | 2013     | 2014     | 2015     | 2016     | 2017     |
|------------------------|----------|----------|----------|----------|----------|----------|----------|----------|----------|----------|
| Albania                | 5753.062 | 5610.413 | 5498.938 | 5456.842 | 5404.499 | 5377.99  | 5373.124 | 5325.109 | 5272.025 | 5227.748 |
| Algeria                | 5720.886 | 5601.219 | 5499.42  | 5418.446 | 5314.406 | 5234.597 | 5162.555 | 5081.103 | 4969.993 | 4888.275 |
| Armenia                | 6973.181 | 6841.302 | 6667.913 | 6436.226 | 6206.424 | 5961.478 | 5837.123 | 5782.492 | 5732.665 | 5735.425 |
| Azerbaijan             | 10956.55 | 10779.9  | 10674.64 | 10534.65 | 10354.9  | 10097.09 | 9912.667 | 9759.502 | 9663.565 | 9660.424 |
| Belarus                | 10186.36 | 10184.89 | 10217.34 | 10286.67 | 9056.067 | 8846.563 | 8543.018 | 8071.676 | 7909.417 | 7892.492 |
| Belize                 | 3986.659 | 3948.68  | 3881.256 | 3813.065 | 3743.185 | 3707.134 | 3708.756 | 3706.974 | 3716.79  | 3709.499 |
| Bosnia and Herzegovina | 5868.306 | 5859.465 | 5768.033 | 5697.285 | 5576.306 | 5560.083 | 5512.787 | 5560.066 | 5482.549 | 5411.824 |
| Botswana               | 4604.909 | 4685.213 | 4659.001 | 4649.301 | 4548.459 | 4485.878 | 4434.514 | 4350.453 | 4200.518 | 4115.869 |
| Brazil                 | 4283.002 | 4204.05  | 4127.806 | 4051.132 | 3939.572 | 3849.396 | 3748.297 | 3691.797 | 3704.752 | 3735.02  |
| Bulgaria               | 8835.409 | 8603.299 | 8428.563 | 8235.735 | 7930.835 | 7736.274 | 7955.539 | 7785.208 | 7741.358 | 7732.12  |
| China                  | 4709.143 | 4758.259 | 4803.317 | 4803.142 | 4777.972 | 4692.8   | 4722.783 | 4763.75  | 4717.811 | 4575.859 |
| Colombia               | 3002.261 | 2956.537 | 2833.176 | 2651.604 | 2575.543 | 2500.543 | 2452.984 | 2445.295 | 2435.064 | 2423.235 |
| Costa Rica             | 2479.665 | 2465.021 | 2661.428 | 2564.566 | 2528.002 | 2494.883 | 2485.255 | 2554.525 | 2677.057 | 2690.021 |
| Cuba                   | 3758.751 | 3726.087 | 3697.309 | 3450.626 | 3498.328 | 3490.313 | 3494.168 | 3574.518 | 3577.064 | 3541.611 |
| Dominica               | 4130.995 | 4129.635 | 4157.694 | 4238.71  | 4327.786 | 4392.918 | 4460.031 | 4441.808 | 4426.588 | 4406.661 |
| Dominican Republic     | 4712.864 | 4713.667 | 4753.083 | 4727.503 | 4881.273 | 5101.251 | 5307.957 | 5455.48  | 5492.8   | 5396.689 |
| Ecuador                | 3239.478 | 3143.079 | 3084.657 | 3022.965 | 2942.41  | 2825.852 | 2750.712 | 2706.408 | 2719.747 | 2704.243 |
| Equatorial Guinea      | 4418.543 | 4305.032 | 4166.206 | 4027.663 | 3945.892 | 3850.304 | 3801.356 | 3767.947 | 3745.371 | 3710.822 |
| Fiji                   | 10007.08 | 9774.289 | 9681.291 | 9488.462 | 9421.496 | 9366.156 | 9301.492 | 9233.845 | 9169.386 | 9097.926 |
| Gabon                  | 6037.297 | 5871.015 | 5647.642 | 5551.877 | 5427.794 | 5288.179 | 5195.936 | 5115.702 | 5021.325 | 4948.71  |
| Grenada                | 4804.589 | 4832.858 | 4864.144 | 4885.173 | 4845.926 | 4852.382 | 4889.972 | 4873.966 | 4911.43  | 4866.6   |
| Guatemala              | 2885.133 | 2989.267 | 2965.003 | 2934.844 | 2900.684 | 2850.679 | 2884.629 | 2881.073 | 2958.942 | 2965.716 |
| Guyana                 | 7865.022 | 7714.114 | 8113.271 | 8462.956 | 8605.606 | 8324.574 | 8173.223 | 8004.061 | 7856.515 | 7726.969 |
| Iran                   | 5415.476 | 5314.648 | 5200.651 | 5099.357 | 4999.067 | 4913.928 | 4850.645 | 4822.5   | 4749.235 | 4670.861 |
| Iraq                   | 7884.013 | 7360.704 | 6907.217 | 6377.966 | 5908.125 | 5592.463 | 5219.691 | 4840.185 | 4647.09  | 4551.413 |
| Jamaica                | 3512.865 | 3744.961 | 3520.188 | 3502.573 | 3628.758 | 3879.93  | 3989.806 | 3988.769 | 4090.156 | 4048.506 |
| Jordan                 | 4712.922 | 4479.956 | 4292.959 | 4154.061 | 4023.98  | 3913.43  | 3875.895 | 3809.278 | 3777.858 | 3759.508 |
| Kazakhstan             | 12049.03 | 11217.96 | 11083.84 | 10734.86 | 10304.47 | 9727.505 | 9205.152 | 8888.778 | 8794.576 | 8627.844 |
| Libya                  | 6310.009 | 6669.129 | 6736.598 | 6737.538 | 6622.49  | 6675.034 | 6764.039 | 6783.888 | 6848.586 | 6881.59  |
| Macedonia              | 6936.727 | 6787.887 | 6600.221 | 6327.329 | 6195.061 | 5867.93  | 5714.389 | 5916.807 | 5918.01  | 5880.094 |
| Malaysia               | 5664.765 | 5734.751 | 5610.779 | 5343.669 | 5262.75  | 5181.478 | 5304.718 | 5349.305 | 5352.684 | 5370.058 |
| Maldives               | 4563.111 | 4168.695 | 3934.661 | 3686.511 | 3479.947 | 3365.124 | 3271.073 | 3220.613 | 3181.897 | 3162.238 |

|                                  |          |          |          |          |          |          |          |          |          |          |
|----------------------------------|----------|----------|----------|----------|----------|----------|----------|----------|----------|----------|
| Marshall Islands                 | 14453.15 | 14276.54 | 14145.55 | 13910.73 | 13700.95 | 13508.92 | 13298.89 | 13138.24 | 12924.35 | 12757.65 |
| Mauritius                        | 5371.539 | 5165.332 | 4859.477 | 4646.238 | 4587.71  | 4434.923 | 4456.244 | 4495.844 | 4493.297 | 4465.121 |
| Mexico                           | 2876.133 | 2934.801 | 2903.698 | 2840.358 | 2825.664 | 2825.669 | 2840.486 | 2829.368 | 2865.455 | 2862.04  |
| Montenegro                       | 7110.409 | 6874.417 | 6680.326 | 6601.576 | 6542.557 | 6536.91  | 6485.548 | 6472.871 | 6451.227 | 6424.79  |
| Namibia                          | 5858.641 | 5490.24  | 5179.681 | 4892.138 | 4737.89  | 4622.058 | 4533.481 | 4470.925 | 4421.555 | 4386.435 |
| Paraguay                         | 4208.838 | 4323.181 | 4332.098 | 4210.121 | 4105.401 | 4131.009 | 3977.642 | 3903.705 | 3872.327 | 3832.539 |
| Peru                             | 2250.553 | 2341.2   | 2312.247 | 2214.311 | 2112.86  | 2014.825 | 1906.419 | 1837.783 | 1820.007 | 1812.458 |
| Romania                          | 7674.986 | 7581.38  | 7369.999 | 6831.268 | 6723.526 | 6495.452 | 6452.845 | 6344.278 | 6282.816 | 6264.816 |
| Russian Federation               | 11979.97 | 11183.74 | 11034.31 | 10024.05 | 9498.043 | 9103.376 | 9026.216 | 8696.464 | 8391.231 | 8258.936 |
| Saint Lucia                      | 4046.382 | 3993.601 | 3960.735 | 3901.223 | 3908.534 | 3934.329 | 3919.988 | 3959.89  | 3978.2   | 4004.957 |
| Saint Vincent and the Grenadines | 4946.954 | 4916.709 | 4901.741 | 4947.752 | 5030.7   | 5100.903 | 5158.615 | 5141.436 | 5117.24  | 5102.27  |
| Samoa                            | 6960.679 | 7030.472 | 7012.536 | 7008.415 | 7000.864 | 6977.336 | 6956.379 | 6932.538 | 6903.91  | 6876.691 |
| Serbia                           | 7642.834 | 7523.755 | 7240.005 | 7154.554 | 7055.997 | 6795.843 | 6741.562 | 6701.989 | 6428.699 | 6300.519 |
| South Africa                     | 5577.484 | 5364.227 | 5083.511 | 4783.358 | 4543.98  | 4333.297 | 4204.529 | 4146.681 | 4052.238 | 3797.177 |
| Suriname                         | 5726.955 | 5532.495 | 5456.433 | 5320.03  | 5211.86  | 5204.71  | 5248.193 | 5375.924 | 5379.247 | 5335.204 |
| Thailand                         | 2948.909 | 2810.971 | 2778.168 | 2708.734 | 2636.44  | 2561.775 | 2545.115 | 2536.267 | 2576.613 | 2572.88  |
| Tonga                            | 5124.853 | 5109.253 | 5111.812 | 5061.167 | 5019.967 | 4984.89  | 4945.115 | 4896.885 | 4842.426 | 4805.223 |
| Turkey                           | 3813.935 | 3879.208 | 3826.599 | 3750.284 | 3685.832 | 3675.065 | 3672.196 | 3585.569 | 3482.318 | 3418.384 |
| Turkmenistan                     | 13180.32 | 11763.76 | 10978.73 | 10790.36 | 10800.61 | 10961.41 | 11066.06 | 11001.31 | 10909.02 | 10860.51 |
| Venezuela                        | 4068.604 | 3993.301 | 3841.27  | 3816.099 | 3833.357 | 3809.798 | 3902.446 | 3927.258 | 3837.764 | 3870.854 |

## Age Standardized DALYs- Lower middle Income countries (2008-2017)

| Country Name                   | 2008     | 2009     | 2010     | 2011     | 2012     | 2013     | 2014     | 2015     | 2016     | 2017     |
|--------------------------------|----------|----------|----------|----------|----------|----------|----------|----------|----------|----------|
| Angola                         | 6662.419 | 6490.774 | 6311.616 | 6158.78  | 6027.64  | 5876.699 | 5619.337 | 5516.344 | 5421.447 | 5358.069 |
| Bangladesh                     | 7480.382 | 7376.21  | 7353.83  | 7020.445 | 6720.641 | 6469.93  | 6292.825 | 6115.04  | 6029.094 | 5975.182 |
| Bhutan                         | 4802.382 | 4757.419 | 4692.475 | 4628.491 | 4566.317 | 4513.411 | 4458.677 | 4402.328 | 4343.761 | 4284.978 |
| Bolivia                        | 4285.416 | 4212.278 | 4142.308 | 4073.705 | 4007.756 | 3947.596 | 3893.821 | 3846.433 | 3802.748 | 3766.15  |
| Cambodia                       | 6065.874 | 5922.995 | 5799.673 | 5692.555 | 5591.251 | 5501.155 | 5433.22  | 5375.407 | 5320.876 | 5270.173 |
| Cameroon                       | 5940.115 | 5855.618 | 5761.135 | 5642.053 | 5514.783 | 5376.112 | 5239.351 | 5115.854 | 5000.226 | 4875.596 |
| Cape Verde                     | 3840.132 | 3804.021 | 3776.353 | 3742.721 | 3729.464 | 3685.422 | 3645.664 | 3606.013 | 3598.663 | 3568.077 |
| Congo                          | 7774.03  | 7591.281 | 7441.736 | 7188.469 | 7072.726 | 6942.687 | 6867.775 | 6784.091 | 6658.647 | 6623.179 |
| Cote d'Ivoire                  | 7284.705 | 7119.112 | 6999.709 | 6895.54  | 6836.254 | 6757.58  | 6661.18  | 6530.585 | 6365.373 | 6219.408 |
| Djibouti                       | 5730.543 | 5657.767 | 5573.679 | 5480.676 | 5404.403 | 5329.922 | 5285.514 | 5218.367 | 5166.409 | 5105.927 |
| Egypt                          | 10495.04 | 10697.52 | 10738.07 | 10581.01 | 10586.68 | 10245.97 | 10120.8  | 10258.95 | 10188    | 10148.52 |
| El Salvador                    | 3399.189 | 3460.234 | 3339.736 | 3332.157 | 3159.043 | 3194.626 | 3337.146 | 3335.923 | 3301.619 | 3265.481 |
| Federated States of Micronesia | 10303.37 | 10289.91 | 10264.48 | 10205.89 | 10148.11 | 10103.76 | 10079.29 | 10048.84 | 9993.907 | 9941.915 |
| Georgia                        | 9168.606 | 9385.116 | 9247.596 | 8932.29  | 8542.814 | 8341.717 | 8120.411 | 8104.048 | 8416.212 | 8505.723 |
| Ghana                          | 6589.874 | 6531.065 | 6461.259 | 6394.345 | 6286.827 | 6180.333 | 6080.173 | 6004.328 | 5921.41  | 5808.053 |
| Honduras                       | 5004.183 | 4934.68  | 4880.679 | 4861.258 | 4815.132 | 4789.991 | 4778.531 | 4733.724 | 4686.761 | 4641.963 |
| India                          | 5731.126 | 5781.185 | 5863.937 | 5933.427 | 5957.751 | 5918.293 | 5882.653 | 5862.28  | 5882.632 | 5804.264 |
| Indonesia                      | 7171.855 | 7171.44  | 7144.291 | 7099.857 | 7076.092 | 7043.678 | 7009.263 | 6978.65  | 6873.967 | 6777.336 |
| Kenya                          | 4983.126 | 4919.401 | 4847.443 | 4770.924 | 4674.282 | 4559.728 | 4460.748 | 4387.248 | 4324.329 | 4256.49  |
| Kiribati                       | 11567.41 | 11555.54 | 11536.8  | 11472.18 | 11388.82 | 11292.62 | 11192.82 | 11075.81 | 10949.2  | 10832.44 |
| Kyrgyzstan                     | 10503.77 | 10019.89 | 9782.41  | 9625.971 | 9429.285 | 9174.758 | 8947.785 | 8583.496 | 8191.501 | 8066.389 |
| Laos                           | 9664.836 | 9394.653 | 9103.533 | 8784.89  | 8561.6   | 8350.153 | 8147.03  | 7951.72  | 7776.255 | 7627.015 |
| Lesotho                        | 9017.69  | 8893.794 | 8871.664 | 8751.768 | 8746.728 | 8741.905 | 8650.068 | 8522.97  | 8193.905 | 7846.216 |
| Mauritania                     | 4949.845 | 4884.599 | 4803.674 | 4747.512 | 4694.686 | 4639.856 | 4577.007 | 4523.267 | 4473.616 | 4425.877 |
| Moldova                        | 9425.155 | 9453.049 | 9406.811 | 8577.782 | 8207.845 | 7884.803 | 8055.445 | 8124.619 | 7699.875 | 7449.824 |
| Mongolia                       | 11680.85 | 11701.86 | 11283.68 | 10779.5  | 10208.11 | 9709.661 | 9289.28  | 9059.956 | 8957.314 | 8890.933 |
| Morocco                        | 9051.881 | 8893.551 | 8747.807 | 8609.706 | 8425.167 | 8287.553 | 8163.822 | 8032.177 | 7909.77  | 7789.301 |
| Myanmar                        | 5280.957 | 5089.989 | 4891.287 | 4732.991 | 4583.25  | 4464.276 | 4344.385 | 4255.935 | 4169.941 | 4091.919 |
| Nicaragua                      | 3033.829 | 2939.616 | 2802.215 | 2808.811 | 2807.482 | 2806.579 | 2873.085 | 2722.318 | 2632.734 | 2579.629 |
| Niger                          | 4826.901 | 4776.495 | 4709.916 | 4701.8   | 4690.298 | 4699.714 | 4722.56  | 4739.862 | 4757.519 | 4733.315 |
| Pakistan                       | 8932.416 | 8825.877 | 8729.293 | 8648.107 | 8577.43  | 8513.175 | 8469.174 | 8390.897 | 8319.647 | 8222.879 |
| Papua New Guinea               | 16047.13 | 15924.99 | 15793.47 | 15629.83 | 15452.94 | 15267.3  | 15051.99 | 14835.48 | 14659.32 | 14493.62 |

|                       |          |          |          |          |          |          |          |          |          |          |
|-----------------------|----------|----------|----------|----------|----------|----------|----------|----------|----------|----------|
| Philippines           | 7449.183 | 7580.464 | 7584.474 | 7606.781 | 7644.872 | 7648.665 | 7618.407 | 7719.98  | 7612.523 | 7493.429 |
| Sao Tome and Principe | 5506.037 | 5502.786 | 5492.803 | 5488.532 | 5574.394 | 5534.242 | 5471.526 | 5438.926 | 5422.72  | 5375.207 |
| Solomon Islands       | 10985.37 | 10915.27 | 10828.48 | 10694.67 | 10571.58 | 10464.48 | 10369.18 | 10284.19 | 10194.82 | 10123.65 |
| Sri Lanka             | 4798.851 | 4526.354 | 4418.253 | 4372.36  | 4245.712 | 4067.35  | 4002.59  | 3899.711 | 3797.999 | 3717.433 |
| Sudan                 | 9950.064 | 9782.927 | 9610.652 | 9416.314 | 9262.597 | 9103.135 | 8959.121 | 8816.897 | 8682.817 | 8576.398 |
| Timor-Leste           | 6491.355 | 6408.156 | 6346.614 | 6318.743 | 6308.694 | 6350.159 | 6427.342 | 6461.079 | 6487.057 | 6517.483 |
| Tunisia               | 5694.133 | 5593.91  | 5498.619 | 5430.195 | 5366.334 | 5310.175 | 5255.989 | 5201.011 | 5144.237 | 5084.058 |
| Ukraine               | 11786.37 | 10500.79 | 10042.98 | 9594.843 | 9590.148 | 9572.213 | 9171.155 | 10973.77 | 10658.16 | 10051.21 |
| Uzbekistan            | 13633.6  | 13337.19 | 13202.7  | 13044.09 | 13011.73 | 12925.15 | 12693.36 | 12525.19 | 12305.78 | 12113.28 |
| Vanuatu               | 12853.47 | 12754.57 | 12630.49 | 12537.34 | 12466.1  | 12396.33 | 12346.29 | 12321.57 | 12295.22 | 12254.98 |
| Vietnam               | 5191.637 | 5134.456 | 5070.91  | 4990.477 | 4918.804 | 4860.762 | 4812.364 | 4764.564 | 4719.105 | 4680.629 |
| Zambia                | 5374.14  | 5254.81  | 5224.666 | 5134.091 | 5027.53  | 4927.976 | 4837.511 | 4772.419 | 4711.203 | 4674.697 |

## Age Standardized DALYs- Low Income countries (2008-2017)

| Country Name                     | 2008     | 2009     | 2010     | 2011     | 2012     | 2013     | 2014     | 2015     | 2016     | 2017     |
|----------------------------------|----------|----------|----------|----------|----------|----------|----------|----------|----------|----------|
| Afghanistan                      | 15381.7  | 14996.43 | 14642.84 | 14326.49 | 14005.41 | 13720.11 | 13471.85 | 13271.98 | 13091.25 | 12951.29 |
| Benin                            | 5024.58  | 4998.144 | 4966.436 | 4969.713 | 4968.346 | 4923.185 | 4853.303 | 4777.224 | 4697.321 | 4623.297 |
| Burkina Faso                     | 5491.391 | 5514.956 | 5485.395 | 5467.232 | 5495.185 | 5486.957 | 5466.932 | 5431.879 | 5389.224 | 5321.61  |
| Burundi                          | 6451.039 | 6280.197 | 6185.519 | 6122.354 | 6053.181 | 5966.755 | 5886.785 | 5815.291 | 5737.237 | 5701.59  |
| Central African Republic         | 9570.542 | 9552.41  | 9571.291 | 9523.61  | 9413.317 | 9457.349 | 9439.066 | 9419.78  | 9353.534 | 9236.369 |
| Chad                             | 5934.058 | 5950.008 | 5983.712 | 5956.091 | 5913.069 | 5834.983 | 5782.785 | 5735.892 | 5698.693 | 5644.731 |
| Comoros                          | 5583.802 | 5495.762 | 5412.838 | 5374.406 | 5321.805 | 5264.643 | 5216.083 | 5166.006 | 5118.967 | 5077.726 |
| Democratic Republic of the Congo | 6663.652 | 6639.013 | 6604.553 | 6584.715 | 6548.635 | 6452.907 | 6363.729 | 6280.405 | 6197.494 | 6140.639 |
| Eritrea                          | 7364.376 | 7246.363 | 7187.995 | 7033.92  | 6877.284 | 6729.476 | 6597.63  | 6546.661 | 6389.502 | 6236.42  |
| Ethiopia                         | 4671.227 | 4471.154 | 4263.676 | 4111.369 | 3976.321 | 3830.814 | 3740.144 | 3668.06  | 3599.619 | 3549.551 |
| Guinea                           | 6793.878 | 6872.907 | 6957.365 | 6976.613 | 6993.669 | 7009.2   | 7040.83  | 6989.356 | 6902.529 | 6804.023 |
| Guinea-Bissau                    | 9134.367 | 9056.572 | 8924.683 | 8761.869 | 8652.779 | 8552.013 | 8440.169 | 8324.251 | 8191.165 | 8039.486 |
| Haiti                            | 9468.791 | 9357.182 | 9353.413 | 9227.289 | 9122.922 | 9017.351 | 8921.892 | 8828.245 | 8745.764 | 8661.772 |
| Liberia                          | 5695.525 | 5740.53  | 5756.682 | 5719.594 | 5744.796 | 5703.63  | 5607.793 | 5541.254 | 5487.103 | 5436.896 |
| Madagascar                       | 9105.692 | 9123.27  | 9105.27  | 9050.342 | 8961.624 | 8864.983 | 8779.045 | 8699.387 | 8595.192 | 8499.178 |
| Malawi                           | 5317.011 | 5190.854 | 5128.889 | 5014.259 | 4904.576 | 4803.202 | 4716.784 | 4659.414 | 4607.519 | 4540.56  |
| Mali                             | 5469.699 | 5415.289 | 5374.805 | 5307.77  | 5259.808 | 5227.391 | 5204.305 | 5196.587 | 5212.656 | 5159.63  |
| Mozambique                       | 7573.189 | 7565.548 | 7580.505 | 7529.829 | 7466.598 | 7364.45  | 7259.237 | 7148.835 | 7014.18  | 6861.497 |
| Nepal                            | 5173.667 | 5219.154 | 5248.551 | 5306.639 | 5331.655 | 5330.505 | 5303.38  | 5311.155 | 5283.112 | 5242.176 |
| Niger                            | 4826.901 | 4776.495 | 4709.916 | 4701.8   | 4690.298 | 4699.714 | 4722.56  | 4739.862 | 4757.519 | 4733.315 |
| North Korea                      | 6750.933 | 6726.257 | 6707.515 | 6688.113 | 6669.022 | 6654.285 | 6625.346 | 6597.911 | 6552.283 | 6491.096 |
| Rwanda                           | 4097.178 | 3920.904 | 3809.117 | 3722.8   | 3665.193 | 3631.068 | 3598.779 | 3559.532 | 3519.703 | 3490.104 |
| Senegal                          | 4893.738 | 4845.502 | 4839.827 | 4843.184 | 4840.882 | 4843.164 | 4843.835 | 4835.096 | 4797.673 | 4758.279 |
| Sierra Leone                     | 7557.632 | 7532.772 | 7527.133 | 7419.579 | 7339.009 | 7168.505 | 7030.213 | 6919.748 | 6802.995 | 6704.524 |
| South Sudan                      | 6130.482 | 6036.274 | 5949.687 | 5869.81  | 5821.466 | 5788.447 | 5748.125 | 5746.622 | 5722.691 | 5686.723 |
| Syria                            | 7903.835 | 7709.337 | 7562.123 | 7485.645 | 7460.148 | 7480.014 | 7497.247 | 7490.326 | 7481.743 | 7437.471 |
| Tajikistan                       | 8449.25  | 8401.665 | 8360.271 | 8346.59  | 8236.303 | 8127.996 | 8147.64  | 8235.335 | 8294.319 | 8270.232 |
| Tanzania                         | 4422.06  | 4373.966 | 4328.557 | 4284.072 | 4299.604 | 4310.888 | 4291.353 | 4280.905 | 4259.757 | 4240.93  |
| The Gambia                       | 6825.685 | 6803.147 | 6774.593 | 6766.742 | 6765.613 | 6752.211 | 6722.739 | 6680.38  | 6618.232 | 6559.815 |
| Togo                             | 6282.076 | 6229.657 | 6201.219 | 6129.701 | 6055.759 | 5953.339 | 5850.451 | 5744.253 | 5650.288 | 5574.39  |
| Uganda                           | 5003.94  | 4818.842 | 4645.621 | 4511.754 | 4427.951 | 4379.729 | 4313.291 | 4201.656 | 4108.8   | 4063.379 |
| Yemen                            | 10631.98 | 10437.81 | 10225.85 | 10090.2  | 9966.759 | 9864.806 | 9792.959 | 9807.498 | 9833.051 | 9855.103 |

|          |          |          |          |         |          |         |          |          |          |          |
|----------|----------|----------|----------|---------|----------|---------|----------|----------|----------|----------|
| Zimbabwe | 8326.922 | 8288.341 | 8067.467 | 7674.59 | 7313.221 | 7008.73 | 6764.138 | 6548.697 | 6375.354 | 6238.641 |
|----------|----------|----------|----------|---------|----------|---------|----------|----------|----------|----------|
