# Supplementary material for: Disparities in Cardiovascular Research Output and Disease Outcomes among High-, Middle- and Low-Income Countries – An Analysis of Global Cardiovascular Publications over the Last Decade (2008–2017)
Source: PubMed Central journal article supplement (PMC7845477; doi:10.5334/gh.815), 2021-01-18
Supplement: gh-16-1-815-s5.pdf [file gh-16-1-815-s5.pdf]

## Age Standardized Death rates- High Income countries (2008-2017)

| Country Name        | 2008     | 2009     | 2010     | 2011     | 2012     | 2013     | 2014     | 2015     | 2016     | 2017     |
|---------------------|----------|----------|----------|----------|----------|----------|----------|----------|----------|----------|
| Andorra             | 115.2623 | 114.6733 | 113.7327 | 112.7481 | 112.2441 | 112.0412 | 111.4779 | 110.4938 | 109.8791 | 109.1345 |
| Antigua and Barbuda | 211.7635 | 207.5422 | 205.5267 | 203.3598 | 200.665  | 198.2481 | 197.8317 | 194.3107 | 192.8148 | 191.5109 |
| Argentina           | 208.6275 | 206.3622 | 204.9061 | 203.1583 | 200.3557 | 197.9608 | 193.1411 | 192.1973 | 193.1299 | 191.0321 |
| Australia           | 128.8712 | 123.1132 | 117.453  | 114.2274 | 108.5537 | 105.0895 | 105.1701 | 105.3454 | 105.9814 | 107.7914 |
| Austria             | 176.0832 | 174.683  | 167.3824 | 163.1627 | 159.0439 | 154.8346 | 151.0529 | 149.3015 | 145.4492 | 145.1827 |
| Bahrain             | 208.4914 | 192.4356 | 182.6156 | 176.2335 | 168.7495 | 161.3976 | 156.2139 | 154.674  | 152.651  | 151.689  |
| Barbados            | 174.6198 | 168.1276 | 167.1036 | 167.6509 | 165.6818 | 166.7464 | 168.8772 | 169.6872 | 169.704  | 170.0497 |
| Belgium             | 144.9872 | 140.4508 | 134.3033 | 131.4917 | 129.5659 | 126.5405 | 119.7165 | 119.8508 | 116.1126 | 114.8976 |
| Brunei              | 219.1366 | 216.2188 | 212.2083 | 210.3747 | 208.3361 | 206.3624 | 204.1297 | 202.3457 | 201.4846 | 201.2846 |
| Canada              | 124.4497 | 119.0095 | 113.3616 | 109.0683 | 108.1467 | 104.8801 | 106.4622 | 107.3028 | 105.9532 | 105.5993 |
| Chile               | 141.1612 | 143.502  | 143.555  | 137.5582 | 134.5105 | 132.7628 | 128.285  | 127.0566 | 126.6239 | 127.9929 |
| Croatia             | 338.3454 | 317.5806 | 308.9121 | 297.8889 | 287.9292 | 271.7611 | 270.2572 | 275.8514 | 257.1542 | 253.7821 |
| Cyprus              | 194.4085 | 183.1494 | 171.4183 | 161.9521 | 154.1645 | 149.35   | 146.594  | 144.1677 | 142.0852 | 141.1708 |
| Czech Republic      | 289.4651 | 279.2687 | 268.1608 | 261.2769 | 255.0737 | 247.7253 | 236.2921 | 234.935  | 229.2269 | 227.4849 |
| Denmark             | 150.3219 | 145.3191 | 138.5619 | 129.2064 | 123.7471 | 119.681  | 114.5941 | 112.452  | 113.6298 | 114.7673 |
| Estonia             | 360.1613 | 343.5089 | 316.7474 | 305.6447 | 296.1915 | 283.1585 | 275.2916 | 261.3363 | 258.3996 | 255.5693 |
| Finland             | 187.2509 | 182.7411 | 177.8675 | 170.8164 | 166.323  | 161.4916 | 155.3772 | 150.9171 | 151.9963 | 153.5066 |
| Germany             | 173.196  | 169.8537 | 164.8143 | 160.8446 | 157.5967 | 158.753  | 153.0305 | 156.7182 | 159.4687 | 156.1385 |
| Greece              | 217.2155 | 206.8261 | 199.2264 | 196.8634 | 195.1276 | 182.7938 | 174.4825 | 173.3689 | 174.8579 | 175.6948 |
| Hungary             | 339.9652 | 338.9602 | 332.4615 | 324.3801 | 319.158  | 306.5562 | 296.4801 | 305.3037 | 285.4094 | 278.2961 |
| Iceland             | 137.5107 | 135.206  | 129.5061 | 125.3802 | 123.7781 | 122.4272 | 121.2159 | 119.965  | 117.997  | 117.9921 |
| Ireland             | 163.9279 | 159.6953 | 142.28   | 142.0708 | 141.293  | 137.4663 | 132.3391 | 130.1327 | 127.0777 | 126.4586 |
| Israel              | 119.6226 | 111.8483 | 106.8152 | 106.5725 | 102.4829 | 99.87729 | 97.09788 | 96.72663 | 94.0857  | 93.31981 |
| Italy               | 138.9116 | 136.2877 | 130.5663 | 129.1328 | 126.803  | 122.0703 | 118.3221 | 120.6429 | 115.4596 | 113.151  |
| Japan               | 93.80241 | 91.1717  | 90.11394 | 89.78451 | 86.83023 | 84.51895 | 82.15665 | 79.37475 | 79.35764 | 79.37036 |
| Kuwait              | 189.3777 | 175.6471 | 159.1733 | 147.7928 | 144.1777 | 138.4774 | 132.4024 | 131.5929 | 131.7587 | 132.2351 |
| Latvia              | 433.7702 | 413.4436 | 406.9801 | 388.516  | 380.7538 | 380.826  | 367.3873 | 358.3737 | 356.6328 | 350.0599 |
| Lithuania           | 420.469  | 385.0979 | 383.4679 | 375.651  | 368.4408 | 367.903  | 352.1904 | 353.2234 | 348.2004 | 342.9892 |
| Luxembourg          | 160.2151 | 155.2855 | 151.1845 | 146.3989 | 142.406  | 137.4531 | 134.1649 | 131.6103 | 129.0628 | 128.2751 |
| Malta               | 197.2393 | 190.0209 | 183.9581 | 178.5474 | 175.5082 | 167.9384 | 163.8382 | 163.4849 | 167.4933 | 168.7107 |
| Netherlands         | 133.8315 | 127.0416 | 122.2636 | 118.8889 | 116.5724 | 112.8316 | 108.6633 | 108.9649 | 109.2002 | 109.3614 |
| New Zealand         | 155.2432 | 148.8295 | 142.5854 | 140.74   | 137.0801 | 132.0288 | 131.5909 | 129.6507 | 128.9521 | 128.7973 |

|                      |          |          |          |          |          |          |          |          |          |          |
|----------------------|----------|----------|----------|----------|----------|----------|----------|----------|----------|----------|
| Norway               | 146.2876 | 141.4425 | 137.3636 | 137.3322 | 127.7506 | 125.7909 | 119.0826 | 114.0514 | 113.5466 | 114.3157 |
| Oman                 | 320.9576 | 314.8811 | 320.98   | 327.7619 | 317.0446 | 299.4423 | 292.3834 | 285.7272 | 268.6023 | 266.3415 |
| Panama               | 139.8191 | 139.9748 | 138.244  | 135.4047 | 134.1566 | 133.7399 | 131.0449 | 128.5239 | 128.6743 | 128.3461 |
| Poland               | 293.6871 | 284.983  | 268.1034 | 258.748  | 254.8874 | 246.7756 | 235.8081 | 236.1324 | 231.3031 | 227.3309 |
| Portugal             | 162.3464 | 155.4066 | 147.9371 | 140.1919 | 136.0452 | 131.4137 | 127.7667 | 124.576  | 126.3559 | 127.8422 |
| Qatar                | 247.3829 | 233.6336 | 220.8197 | 211.0384 | 202.6178 | 194.7543 | 187.6014 | 181.9566 | 177.8391 | 176.6898 |
| Saudi Arabia         | 305.6672 | 309.007  | 310.6985 | 309.217  | 303.6555 | 295.2308 | 284.2429 | 274.6964 | 266.6718 | 259.538  |
| Seychelles           | 270.6019 | 270.2075 | 265.8648 | 261.9364 | 258.7136 | 252.4876 | 248.4676 | 247.4    | 244.7863 | 242.6481 |
| Singapore            | 134.9887 | 122.8803 | 116.7366 | 113.1009 | 109.099  | 103.789  | 99.83472 | 96.31142 | 92.58692 | 92.24346 |
| Slovakia             | 370.3929 | 360.8356 | 344.5842 | 333.2294 | 320.0938 | 308.5912 | 299.2575 | 303.2657 | 292.2996 | 287.959  |
| Slovenia             | 194.9794 | 188.6106 | 180.8711 | 173.2762 | 172.1414 | 167.9308 | 156.971  | 157.2871 | 154.1939 | 153.4934 |
| Spain                | 127.0985 | 120.0597 | 114.3888 | 111.9279 | 109.2744 | 104.7686 | 102.7833 | 104.7323 | 101.2341 | 99.40349 |
| Sweden               | 169.2202 | 164.154  | 156.1527 | 153.604  | 148.7403 | 144.6716 | 140.2105 | 136.7982 | 134.0919 | 133.982  |
| Switzerland          | 127.2924 | 125.29   | 120.7284 | 114.8138 | 113.0262 | 110.372  | 105.7838 | 104.2296 | 101.6597 | 99.73932 |
| The Bahamas          | 239.9959 | 243.7502 | 242.4645 | 242.4397 | 237.0113 | 235.0366 | 235.0962 | 236.9815 | 236.5669 | 235.9542 |
| Trinidad and Tobago  | 257.7069 | 244.4143 | 231.4734 | 214.7092 | 211.7099 | 219.2432 | 220.6053 | 220.8334 | 227.0618 | 228.467  |
| United Arab Emirates | 325.3183 | 322.7223 | 322.2391 | 321.9385 | 322.1766 | 321.5072 | 321.1363 | 320.2391 | 319.3754 | 317.8397 |
| United Kingdom       | 151.146  | 142.0408 | 135.9897 | 129.2596 | 126.1348 | 125.2388 | 121.6865 | 122.3063 | 121.6966 | 122.1372 |
| United States        | 167.1522 | 161.9411 | 156.1114 | 154.9615 | 152.3738 | 150.7277 | 149.6784 | 149.3207 | 150.5341 | 151.0895 |
| Uruguay              | 185.4389 | 175.4086 | 171.8371 | 175.3387 | 172.1632 | 165.8276 | 159.3341 | 159.5283 | 159.9259 | 160.7084 |

## Age Standardized Death rates- Upper Middle Income countries (2008-2017)

| Country name           | 2008     | 2009     | 2010     | 2011     | 2012     | 2013     | 2014     | 2015     | 2016     | 2017     |
|------------------------|----------|----------|----------|----------|----------|----------|----------|----------|----------|----------|
| Albania                | 336.9151 | 328.2437 | 322.9101 | 319.5235 | 316.3277 | 314.5838 | 313.6391 | 310.4933 | 307.1128 | 304.1954 |
| Algeria                | 321.7407 | 316.0801 | 312.1666 | 308.2453 | 302.6015 | 298.027  | 293.7284 | 289.0246 | 282.5895 | 278.3639 |
| Armenia                | 404.1899 | 396.2588 | 387.932  | 376.0226 | 364.1051 | 351.8897 | 345.0186 | 341.535  | 339.4903 | 341.0098 |
| Azerbaijan             | 622.4219 | 611.7261 | 609.1467 | 605.5032 | 594.413  | 577.0034 | 569.2291 | 561.3328 | 556.9871 | 559.8121 |
| Belarus                | 529.8612 | 532.6357 | 532.9338 | 536.5877 | 485.8399 | 481.2073 | 467.4327 | 447.6967 | 443.9504 | 443.1292 |
| Belize                 | 196.5093 | 194.2569 | 188.9695 | 184.5123 | 179.8021 | 178.1179 | 178.3041 | 177.8275 | 177.0288 | 176.9573 |
| Bosnia and Herzegovina | 337.2964 | 344.7582 | 342.1082 | 339.5564 | 334.6852 | 334.4965 | 334.066  | 338.9084 | 333.7344 | 329.6346 |
| Botswana               | 253.4542 | 260.2092 | 261.2581 | 262.3706 | 258.3528 | 256.1545 | 254.2256 | 250.0778 | 241.8905 | 237.372  |
| Brazil                 | 201.9913 | 198.4519 | 195.5421 | 192.2608 | 186.6537 | 182.4662 | 178.0148 | 175.9413 | 176.6137 | 177.9606 |
| Bulgaria               | 492.8907 | 477.9616 | 471.6961 | 461.4118 | 445.3816 | 431.9586 | 442.944  | 432.0115 | 426.0957 | 424.6881 |
| China                  | 273.8712 | 279.4101 | 283.8327 | 284.0114 | 280.5499 | 271.8287 | 271.1663 | 271.1419 | 268.0772 | 261.8991 |
| Colombia               | 156.9041 | 153.2299 | 146.5683 | 136.7838 | 132.4049 | 128.4023 | 125.6792 | 125.6327 | 125.0977 | 124.2398 |
| Costa Rica             | 124.5825 | 123.1618 | 132.9113 | 128.3784 | 127.0398 | 125.5241 | 125.6537 | 129.9302 | 136.8902 | 137.9732 |
| Cuba                   | 203.5257 | 201.9916 | 200.6366 | 186.2974 | 187.4821 | 186.9935 | 188.2587 | 193.1026 | 193.2357 | 190.9682 |
| Dominica               | 214.1783 | 212.8968 | 213.8843 | 217.628  | 222.4317 | 225.8035 | 230.0868 | 229.7572 | 228.674  | 227.376  |
| Dominican Republic     | 231.7355 | 232.1918 | 234.325  | 232.5872 | 240.337  | 251.5841 | 262.2084 | 269.4831 | 271.4306 | 266.653  |
| Ecuador                | 166.1898 | 159.6948 | 157.064  | 155.3875 | 152.1425 | 146.4864 | 143.4002 | 141.4747 | 141.8467 | 140.4478 |
| Equatorial Guinea      | 240.5267 | 234.2717 | 227.427  | 221.1333 | 216.8067 | 211.8543 | 208.103  | 206.5315 | 205.1368 | 202.8121 |
| Fiji                   | 454.2384 | 445.1527 | 441.5645 | 432.6727 | 428.972  | 425.5689 | 422.0868 | 418.3935 | 415.3743 | 412.8204 |
| Gabon                  | 310.5197 | 302.5784 | 292.6554 | 288.2792 | 282.3129 | 275.6288 | 271.1243 | 267.3336 | 263.2048 | 259.9667 |
| Grenada                | 244.672  | 246.8319 | 248.869  | 249.5312 | 245.3488 | 245.7309 | 247.258  | 245.5944 | 246.9333 | 243.9639 |
| Guatemala              | 154.5075 | 160.1605 | 158.9956 | 157.795  | 156.0654 | 152.8257 | 154.0593 | 153.0415 | 156.2472 | 155.8977 |
| Guyana                 | 375.7256 | 368.4665 | 386.8467 | 403.6667 | 410.3259 | 397.3869 | 391.3552 | 384.6005 | 378.6517 | 373.1588 |
| Iran                   | 295.0621 | 290.0657 | 285.8827 | 281.1586 | 275.3436 | 271.6486 | 271.4011 | 273.1128 | 272.3687 | 270.3077 |
| Iraq                   | 384.813  | 359.1619 | 338.5322 | 311.4318 | 288.1153 | 275.2609 | 254.7061 | 232.9021 | 222.72   | 218.6121 |
| Jamaica                | 181.4244 | 193.3219 | 182.6421 | 179.1565 | 183.4702 | 197.118  | 202.5363 | 201.438  | 208.6857 | 206.5373 |
| Jordan                 | 248.837  | 238.8942 | 232.8698 | 226.9202 | 220.6527 | 215.5778 | 214.2224 | 210.3594 | 208.8669 | 208.2568 |
| Kazakhstan             | 605.0006 | 570.5642 | 568.0561 | 558.013  | 542.0063 | 517.5382 | 495.5192 | 482.1751 | 478.2346 | 466.7918 |
| Libya                  | 304.598  | 333.7239 | 342.374  | 336.3601 | 329.5508 | 334.5099 | 338.7911 | 336.7364 | 339.9319 | 341.8622 |
| Macedonia              | 400.0408 | 387.8884 | 375.5576 | 357.9909 | 348.0273 | 326.2761 | 313.7159 | 322.7601 | 322.5582 | 322.6881 |
| Malaysia               | 286.4937 | 288.8433 | 280.7066 | 262.2114 | 256.2148 | 250.3223 | 255.474  | 257.7271 | 258.7151 | 260.9423 |
| Maldives               | 248.7158 | 223.8313 | 210.7665 | 196.1964 | 183.8149 | 177.5326 | 171.8516 | 168.4307 | 166.1878 | 164.9051 |

|                                  |          |          |          |          |          |          |          |          |          |          |
|----------------------------------|----------|----------|----------|----------|----------|----------|----------|----------|----------|----------|
| Marshall Islands                 | 627.2965 | 618.0004 | 615.1401 | 603.4077 | 594.8088 | 589.1622 | 578.611  | 575.1416 | 564.4997 | 557.7926 |
| Mauritius                        | 262.9032 | 249.5756 | 234.7378 | 224.5265 | 226.5077 | 221.0817 | 222.4004 | 223.4589 | 225.6893 | 224.6442 |
| Mexico                           | 149.4874 | 152.6259 | 152.0331 | 148.8895 | 148.866  | 150.8245 | 152.5696 | 152.5523 | 154.1592 | 152.7829 |
| Montenegro                       | 407.1052 | 389.0179 | 379.069  | 379.9945 | 383.5034 | 386.1844 | 384.799  | 387.2397 | 388.2318 | 387.3046 |
| Namibia                          | 317.6757 | 299.3764 | 283.4463 | 268.9714 | 261.7635 | 255.8258 | 251.5661 | 248.4844 | 245.9552 | 243.8106 |
| Paraguay                         | 208.8114 | 215.9962 | 220.1365 | 215.7631 | 211.3518 | 215.5176 | 207.4711 | 203.4607 | 201.2873 | 199.1279 |
| Peru                             | 105.6291 | 109.5677 | 108.6502 | 104.0651 | 100.0185 | 95.65385 | 90.02652 | 86.48304 | 85.52351 | 85.75458 |
| Romania                          | 452.835  | 448.9594 | 438.659  | 410.6244 | 404.1437 | 388.9679 | 385.332  | 379.5767 | 373.4033 | 370.9463 |
| Russian Federation               | 601.3386 | 566.1767 | 559.2963 | 513.1887 | 489.6382 | 471.0364 | 465.9564 | 452.4579 | 439.0592 | 431.2975 |
| Saint Lucia                      | 207.0581 | 204.0725 | 201.9421 | 197.8071 | 198.4097 | 199.7986 | 198.1753 | 201.0346 | 202.5637 | 204.6199 |
| Saint Vincent and the Grenadines | 251.7599 | 249.2193 | 247.6327 | 248.8841 | 252.6464 | 256.0434 | 258.3194 | 257.0919 | 254.489  | 252.6754 |
| Samoa                            | 343.3471 | 351.4523 | 352.0949 | 354.3825 | 354.6501 | 353.8017 | 353.047  | 352.0222 | 350.6077 | 348.9773 |
| Serbia                           | 488.8335 | 487.7499 | 475.3697 | 477.8116 | 479.329  | 465.2372 | 463.8286 | 461.9567 | 446.5277 | 439.415  |
| South Africa                     | 285.1441 | 278.2547 | 266.4758 | 254.1185 | 243.7709 | 233.4267 | 226.5848 | 223.9414 | 217.9613 | 200.3805 |
| Suriname                         | 268.023  | 257.9376 | 253.9581 | 248.0923 | 243.8072 | 245.4691 | 251.92   | 262.9356 | 264.7084 | 258.3135 |
| Thailand                         | 133.4393 | 126.1846 | 124.345  | 120.0098 | 114.921  | 110.5204 | 109.0297 | 107.9601 | 109.4834 | 109.8612 |
| Tonga                            | 245.708  | 244.265  | 244.1543 | 241.4929 | 239.2442 | 237.389  | 235.2561 | 232.6599 | 229.7345 | 227.4903 |
| Turkey                           | 183.6404 | 188.1805 | 186.9624 | 184.8499 | 182.8745 | 183.6648 | 184.5383 | 180.4059 | 174.7572 | 171.2854 |
| Turkmenistan                     | 668.5819 | 600.1762 | 560.8839 | 550.7172 | 548.8051 | 551.1693 | 551.6723 | 545.9535 | 539.3308 | 536.7835 |
| Venezuela                        | 204.0806 | 200.679  | 195.0271 | 194.8944 | 195.8859 | 199.2874 | 212.8216 | 216.8741 | 203.7885 | 204.8503 |

## Age Standardized Death rates- Lower Middle Income countries (2008-2017)

| Country name                   | 2008     | 2009     | 2010     | 2011     | 2012     | 2013     | 2014     | 2015     | 2016     | 2017     |
|--------------------------------|----------|----------|----------|----------|----------|----------|----------|----------|----------|----------|
| Angola                         | 336.4515 | 328.7227 | 320.4133 | 313.3853 | 307.106  | 300.0315 | 287.9931 | 283.1517 | 279.1456 | 276.0446 |
| Bangladesh                     | 379.7372 | 376.6877 | 376.8675 | 356.1783 | 336.4253 | 322.8198 | 313.3434 | 303.1673 | 299.2407 | 298.0025 |
| Bhutan                         | 239.07   | 237.5101 | 235.0588 | 232.6285 | 230.11   | 227.8164 | 225.3159 | 222.7243 | 219.9492 | 217.0658 |
| Bolivia                        | 222.5691 | 220.0411 | 217.68   | 215.371  | 213.048  | 210.8598 | 208.9232 | 207.1963 | 205.5859 | 204.299  |
| Cambodia                       | 303.747  | 297.5214 | 292.1625 | 287.3685 | 282.9461 | 279.1401 | 276.3574 | 274.2152 | 272.3828 | 270.8922 |
| Cameroon                       | 292.3333 | 288.471  | 284.2885 | 279.2154 | 273.757  | 267.7385 | 261.7222 | 256.1282 | 250.5943 | 244.6605 |
| Cape Verde                     | 190.4052 | 189.6477 | 188.8948 | 188.2539 | 187.5644 | 186.1392 | 184.5257 | 182.9646 | 183.5097 | 182.2188 |
| Congo                          | 390.3861 | 383.7722 | 383.9513 | 367.7473 | 362.4706 | 355.4336 | 354.1594 | 355.7912 | 345.6894 | 344.0942 |
| Cote d'Ivoire                  | 351.2499 | 344.4579 | 339.4691 | 334.9584 | 331.8479 | 327.8073 | 323.2328 | 317.2701 | 310.1642 | 303.7401 |
| Djibouti                       | 283.3361 | 279.9791 | 276.4172 | 272.5447 | 269.4192 | 266.2792 | 264.9038 | 262.1243 | 260.3392 | 258.0371 |
| Egypt                          | 534.5218 | 543.227  | 544.7561 | 537.5572 | 538.4219 | 523.5111 | 518.4283 | 526.4097 | 524.8218 | 525.4322 |
| El Salvador                    | 172.7639 | 176.0688 | 170.6302 | 170.2625 | 161.1912 | 163.542  | 171.2515 | 171.6802 | 169.1992 | 167.2945 |
| Federated States of Micronesia | 466.1099 | 465.9515 | 465.1991 | 463.0164 | 460.794  | 459.3947 | 458.9149 | 458.0429 | 456.2349 | 454.3434 |
| Georgia                        | 495.7689 | 512.6867 | 509.1728 | 496.0685 | 477.1479 | 465.1826 | 465.9318 | 478.0931 | 494.5972 | 496.218  |
| Ghana                          | 328.6522 | 326.6943 | 324.2312 | 321.8694 | 317.6749 | 313.4601 | 309.4467 | 306.1699 | 302.6388 | 298.2453 |
| Honduras                       | 249.6281 | 247.5155 | 246.1876 | 246.4754 | 245.7406 | 245.7757 | 246.7132 | 244.6593 | 242.4481 | 240.2083 |
| India                          | 273.8964 | 276.1286 | 279.7247 | 283.1571 | 284.8791 | 284.0366 | 283.6081 | 283.7759 | 285.4779 | 282.2795 |
| Indonesia                      | 350.231  | 351.5678 | 351.7459 | 351.0077 | 351.044  | 350.7424 | 350.6392 | 350.4106 | 346.5785 | 342.8637 |
| Kenya                          | 249.2997 | 246.6038 | 243.4232 | 240.1317 | 236.1149 | 231.4124 | 227.3674 | 224.3147 | 221.6553 | 218.6366 |
| Kiribati                       | 455.9842 | 456.474  | 456.437  | 454.6247 | 452.3546 | 449.4588 | 446.4586 | 442.8095 | 438.6427 | 434.6567 |
| Kyrgyzstan                     | 544.1123 | 525.0605 | 511.4205 | 507.0409 | 502.5452 | 493.9719 | 488.2011 | 468.974  | 444.5354 | 436.3624 |
| Laos                           | 453.7888 | 442.5779 | 430.4047 | 416.8301 | 407.2574 | 398.2473 | 389.5245 | 381.2277 | 373.9311 | 368.1114 |
| Lesotho                        | 453.5195 | 449.2284 | 449.9865 | 444.8947 | 445.6901 | 446.5795 | 442.5871 | 437.0814 | 421.7798 | 405.1258 |
| Mauritania                     | 255.7619 | 252.2385 | 248.273  | 246.0107 | 243.9253 | 241.7317 | 238.6505 | 236.0511 | 234.2017 | 232.3472 |
| Moldova                        | 510.7564 | 511.2774 | 508.191  | 469.7604 | 452.9716 | 433.2756 | 441.0284 | 444.7515 | 421.5451 | 408.5022 |
| Mongolia                       | 596.4328 | 602.0047 | 576.9589 | 550.8118 | 519.5054 | 495.7508 | 477.532  | 468.4741 | 463.4737 | 460.0425 |
| Morocco                        | 478.7461 | 470.4318 | 463.6244 | 457.0317 | 446.8833 | 440.9674 | 435.3462 | 429.6343 | 424.3626 | 419.1459 |
| Myanmar                        | 256.4158 | 247.712  | 238.53   | 231.3134 | 224.5763 | 219.204  | 213.7463 | 209.6985 | 205.7248 | 202.1045 |
| Nicaragua                      | 164.5267 | 158.9291 | 150.5357 | 150.2216 | 149.4522 | 149.0553 | 152.6146 | 144.7268 | 139.9402 | 137.0156 |
| Niger                          | 240.8886 | 239.2353 | 237.0105 | 236.902  | 236.3888 | 236.8384 | 238.0233 | 238.9589 | 239.709  | 238.3388 |
| Pakistan                       | 441.6631 | 438.3956 | 435.6016 | 433.4756 | 431.7924 | 430.4417 | 429.7905 | 427.9218 | 426.1258 | 423.0313 |
| Papua New Guinea               | 608.2924 | 604.9783 | 601.3912 | 596.7077 | 591.0478 | 585.278  | 578.7851 | 572.5156 | 566.8814 | 561.4939 |

|                       |          |          |          |          |          |          |          |          |          |          |
|-----------------------|----------|----------|----------|----------|----------|----------|----------|----------|----------|----------|
| Philippines           | 366.848  | 372.2705 | 372.4654 | 374.1948 | 376.9526 | 377.7464 | 376.4228 | 380.6781 | 375.7538 | 370.4369 |
| Sao Tome and Principe | 266.3571 | 267.1728 | 267.8744 | 268.0859 | 271.7353 | 270.2204 | 268.668  | 268.2818 | 270.4426 | 270.1134 |
| Solomon Islands       | 490.4858 | 488.0578 | 484.965  | 480.1324 | 475.7745 | 471.9291 | 468.5747 | 465.4847 | 462.2649 | 459.7797 |
| Sri Lanka             | 255.5667 | 239.8355 | 235.9763 | 232.5272 | 225.3993 | 216.2508 | 212.1026 | 207.0822 | 201.5169 | 197.0932 |
| Sudan                 | 487.2046 | 479.9594 | 472.7865 | 464.592  | 457.8668 | 451.4415 | 445.5574 | 440.1916 | 435.255  | 431.388  |
| Timor-Leste           | 329.1698 | 326.5054 | 324.5805 | 324.0812 | 324.3211 | 327.1619 | 331.2601 | 332.8059 | 333.634  | 335.3455 |
| Tunisia               | 345.612  | 339.9647 | 334.6828 | 331.4693 | 329.1376 | 327.268  | 325.5178 | 323.5379 | 321.4525 | 318.9908 |
| Ukraine               | 637.6527 | 587.0583 | 571.125  | 546.2865 | 542.8165 | 537.4405 | 510.3686 | 583.2711 | 565.452  | 539.8491 |
| Uzbekistan            | 791.3349 | 781.987  | 778.8175 | 771.3129 | 772.2716 | 770.6447 | 754.771  | 746.7353 | 734.7666 | 724.4167 |
| Vanuatu               | 566.9193 | 563.1561 | 558.5023 | 555.3158 | 553.0342 | 550.7217 | 549.0249 | 548.4805 | 547.4542 | 546.3002 |
| Vietnam               | 270.151  | 266.3665 | 262.4189 | 258.2632 | 254.7256 | 251.968  | 249.9834 | 248.1991 | 246.6714 | 245.4646 |
| Zambia                | 266.9862 | 261.5001 | 259.8848 | 255.6341 | 250.8982 | 246.4702 | 242.4111 | 239.3056 | 236.3192 | 234.4993 |

## Age Standardized Death rates- Low Income countries (2008-2017)

| Country name                     | 2008     | 2009     | 2010     | 2011     | 2012     | 2013     | 2014     | 2015     | 2016     | 2017     |
|----------------------------------|----------|----------|----------|----------|----------|----------|----------|----------|----------|----------|
| Afghanistan                      | 693.4487 | 677.8455 | 662.6169 | 649.7256 | 637.1616 | 626.1621 | 616.6694 | 608.3015 | 601.5117 | 597.0293 |
| Benin                            | 252.7368 | 251.6936 | 250.5106 | 250.7337 | 250.7267 | 248.419  | 245.3664 | 242.0932 | 238.9727 | 235.8481 |
| Burkina Faso                     | 280.005  | 282.0726 | 280.2483 | 279.2169 | 279.6888 | 278.8668 | 277.4883 | 275.2915 | 272.4182 | 269.0485 |
| Burundi                          | 328.6147 | 321.0395 | 317.004  | 313.4533 | 309.8407 | 305.667  | 301.6341 | 298.479  | 294.9723 | 293.0677 |
| Central African Republic         | 450.7134 | 449.8535 | 449.9551 | 448.0681 | 444.1785 | 445.3755 | 444.5944 | 443.6055 | 440.7928 | 435.7265 |
| Chad                             | 292.5967 | 293.8994 | 295.2447 | 294.4838 | 292.8466 | 289.2615 | 287.2985 | 285.0532 | 283.4847 | 280.9955 |
| Comoros                          | 281.5765 | 277.8206 | 274.3455 | 272.5655 | 270.2107 | 268.2238 | 266.5606 | 264.7805 | 263.0312 | 261.5161 |
| Democratic Republic of the Congo | 343.14   | 341.7417 | 340.0489 | 339.2778 | 337.8007 | 333.6378 | 329.4388 | 325.4805 | 321.8132 | 318.9486 |
| Eritrea                          | 352.536  | 348.3402 | 346.4384 | 340.9149 | 334.8275 | 329.1927 | 324.1291 | 323.7582 | 317.4691 | 311.1095 |
| Ethiopia                         | 236.157  | 226.5897 | 216.2545 | 208.8918 | 202.2597 | 195.0445 | 190.8937 | 187.6971 | 184.7659 | 182.6344 |
| Guinea                           | 334.5195 | 338.3559 | 342.0297 | 343.282  | 344.6042 | 345.3296 | 346.6671 | 344.5728 | 341.075  | 336.7168 |
| Guinea-Bissau                    | 429.1474 | 425.9462 | 420.2665 | 413.3254 | 408.997  | 404.2759 | 399.49   | 394.6129 | 388.9557 | 382.4743 |
| Haiti                            | 459.9272 | 455.4801 | 454.9508 | 453.8324 | 449.4536 | 444.915  | 440.822  | 437.1738 | 433.9231 | 430.5481 |
| Liberia                          | 283.2795 | 285.287  | 286.0436 | 284.4704 | 284.538  | 282.6085 | 279.1656 | 276.8746 | 274.7672 | 272.5093 |
| Madagascar                       | 433.4851 | 433.1648 | 431.6945 | 429.0223 | 425.4296 | 421.5882 | 417.8032 | 414.3495 | 410.0928 | 405.9941 |
| Malawi                           | 263.111  | 256.6373 | 252.8621 | 247.3722 | 242.7028 | 238.6362 | 235.1066 | 232.5338 | 230.2834 | 227.349  |
| Mali                             | 280.3852 | 278.2097 | 276.9527 | 274.6051 | 273.0865 | 272.1028 | 271.2565 | 270.4916 | 270.1558 | 268.0242 |
| Mozambique                       | 362.6849 | 361.8582 | 362.0908 | 359.7808 | 356.8653 | 352.2    | 347.5739 | 342.5625 | 336.7356 | 329.9419 |
| Nepal                            | 251.7777 | 254.8869 | 257.4135 | 261.5119 | 263.7801 | 264.131  | 263.0943 | 263.5303 | 262.5492 | 260.7973 |
| Niger                            | 240.8886 | 239.2353 | 237.0105 | 236.902  | 236.3888 | 236.8384 | 238.0233 | 238.9589 | 239.709  | 238.3388 |
| North Korea                      | 337.4986 | 334.9067 | 333.312  | 331.2953 | 329.9587 | 329.3702 | 327.7425 | 326.8726 | 324.5389 | 321.6811 |
| Rwanda                           | 218.6219 | 210.3697 | 205.2244 | 201.0809 | 198.4842 | 197.1778 | 195.6722 | 193.9295 | 192.5048 | 191.3751 |
| Senegal                          | 244.6496 | 242.9339 | 243.1681 | 243.9498 | 243.7776 | 243.7486 | 244.2638 | 244.4243 | 243.3064 | 241.2191 |
| Sierra Leone                     | 359.2842 | 358.7388 | 358.5212 | 354.766  | 351.1285 | 343.9521 | 338.3256 | 334.2617 | 329.8887 | 325.721  |
| South Sudan                      | 305.0772 | 300.2835 | 296.0392 | 292.2696 | 289.5652 | 287.3772 | 284.802  | 283.84   | 282.5393 | 280.7752 |
| Syria                            | 393.9888 | 387.1346 | 381.907  | 379.1242 | 376.9906 | 378.0718 | 378.8141 | 377.6273 | 377.9392 | 376.2643 |
| Tajikistan                       | 434.3167 | 431.578  | 430.0232 | 429.703  | 424.9035 | 420.4208 | 420.6292 | 426.4648 | 428.9046 | 427.6982 |
| Tanzania                         | 225.4218 | 223.1444 | 221.1739 | 219.0279 | 219.7144 | 220.385  | 219.7232 | 219.1048 | 218.1718 | 217.2882 |
| The Gambia                       | 341.1653 | 340.5569 | 339.6928 | 339.6445 | 339.5753 | 339.1222 | 337.9238 | 336.2641 | 333.819  | 331.4303 |
| Togo                             | 310.3391 | 307.7683 | 306.3768 | 303.6182 | 300.5483 | 296.3888 | 291.6926 | 287.0873 | 283.3324 | 280.0328 |
| Uganda                           | 259.3489 | 250.064  | 241.3351 | 234.2956 | 229.8062 | 227.3158 | 224.3182 | 219.4865 | 215.4124 | 213.3327 |
| Yemen                            | 520.2505 | 512.9382 | 504.6396 | 499.3245 | 495.0052 | 491.6074 | 490.1485 | 491.3076 | 492.9732 | 495.0027 |

|          |          |          |         |          |          |          |          |          |          |          |
|----------|----------|----------|---------|----------|----------|----------|----------|----------|----------|----------|
| Zimbabwe | 399.0601 | 397.3711 | 387.696 | 370.4478 | 354.9099 | 341.3103 | 330.5272 | 320.9852 | 313.6081 | 307.8462 |
|----------|----------|----------|---------|----------|----------|----------|----------|----------|----------|----------|
