# Supplementary material for: Disparities in Cardiovascular Research Output and Disease Outcomes among High-, Middle- and Low-Income Countries – An Analysis of Global Cardiovascular Publications over the Last Decade (2008–2017)
Source: PubMed Central journal article supplement (PMC7845477; doi:10.5334/gh.815), 2021-01-18
Supplement: gh-16-1-815-s6.pdf [file gh-16-1-815-s6.pdf]

Total population- High income countries (2008-2017)

| Country name        | 2008     | 2009     | 2010     | 2011     | 2012     | 2013     | 2014     | 2015     | 2016     | 2017     |
|---------------------|----------|----------|----------|----------|----------|----------|----------|----------|----------|----------|
| Andorra             | 83861    | 84462    | 84449    | 83751    | 82431    | 80788    | 79223    | 78014    | 77281    | 76965    |
| Antigua and Barbuda | 92478    | 93581    | 94661    | 95719    | 96777    | 97824    | 98875    | 99923    | 100963   | 102012   |
| Argentina           | 40382389 | 40799407 | 41223889 | 41656879 | 42096739 | 42539925 | 42981515 | 43417765 | 43847430 | 44271041 |
| Australia           | 21249200 | 21691700 | 22031750 | 22340024 | 22742475 | 23145901 | 23504138 | 23850784 | 24210809 | 24598933 |
| Austria             | 8321496  | 8343323  | 8363404  | 8391643  | 8429991  | 8479823  | 8546356  | 8642699  | 8736668  | 8809212  |
| Bahrain             | 1114590  | 1185029  | 1240862  | 1278269  | 1300217  | 1315411  | 1336397  | 1371855  | 1425171  | 1492584  |
| Barbados            | 277319   | 278470   | 279569   | 280601   | 281585   | 282509   | 283385   | 284217   | 284996   | 285719   |
| Belgium             | 10709973 | 10796493 | 10895586 | 11047744 | 11128246 | 11182817 | 11209057 | 11274196 | 11331422 | 11372068 |
| Brunei              | 379252   | 383772   | 388662   | 394013   | 399748   | 405716   | 411704   | 417542   | 423196   | 428697   |
| Canada              | 33245773 | 33628571 | 34005274 | 34342780 | 34750545 | 35152370 | 35535348 | 35832513 | 36264604 | 36708083 |
| Chile               | 16661942 | 16829442 | 16993354 | 17153357 | 17309746 | 17462982 | 17613798 | 17762681 | 17909754 | 18054726 |
| Croatia             | 4434508  | 4429078  | 4417781  | 4280622  | 4267558  | 4255689  | 4238389  | 4203604  | 4174349  | 4125700  |
| Cyprus              | 1081563  | 1098076  | 1112607  | 1124835  | 1135062  | 1143896  | 1152309  | 1160985  | 1170125  | 1179551  |
| Czech Republic      | 10384603 | 10443936 | 10474410 | 10496088 | 10510785 | 10514272 | 10525347 | 10546059 | 10566332 | 10591323 |
| Denmark             | 5493621  | 5523095  | 5547683  | 5570572  | 5591572  | 5614932  | 5643475  | 5683483  | 5728010  | 5769603  |
| Estonia             | 1337090  | 1334515  | 1331475  | 1327439  | 1322696  | 1317997  | 1314545  | 1315407  | 1315790  | 1315480  |
| Finland             | 5313399  | 5338871  | 5363352  | 5388272  | 5413971  | 5438972  | 5461512  | 5479531  | 5495303  | 5511303  |
| Germany             | 82110097 | 81902307 | 81776930 | 80274983 | 80425823 | 80645605 | 80982500 | 81686611 | 82348669 | 82695000 |
| Greece              | 11077841 | 11107017 | 11121341 | 11104899 | 11045011 | 10965211 | 10892413 | 10820883 | 10775971 | 10760421 |
| Hungary             | 10038188 | 10022650 | 10000023 | 9971727  | 9920362  | 9893082  | 9866468  | 9843028  | 9814023  | 9781127  |
| Iceland             | 317414   | 318499   | 318041   | 319014   | 320716   | 323764   | 327386   | 330815   | 335439   | 341284   |
| Ireland             | 4489544  | 4535375  | 4560155  | 4580084  | 4599533  | 4623816  | 4657740  | 4701957  | 4755335  | 4813608  |
| Israel              | 7308800  | 7485600  | 7623600  | 7765800  | 7910500  | 8059500  | 8215700  | 8380100  | 8546000  | 8712400  |
| Italy               | 58826731 | 59095365 | 59277417 | 59379449 | 59539717 | 60233948 | 60789140 | 60730582 | 60627498 | 60551416 |
| Japan               | 1.28E+08 | 1.28E+08 | 1.28E+08 | 1.28E+08 | 1.28E+08 | 1.27E+08 | 1.27E+08 | 1.27E+08 | 1.27E+08 | 1.27E+08 |
| Kuwait              | 2652340  | 2818939  | 2998083  | 3191051  | 3395556  | 3598385  | 3782450  | 3935794  | 4052584  | 4136528  |
| Latvia              | 2177322  | 2141669  | 2097555  | 2059709  | 2034319  | 2012647  | 1993782  | 1977527  | 1959537  | 1940740  |
| Lithuania           | 3198231  | 3162916  | 3097282  | 3028115  | 2987773  | 2957689  | 2932367  | 2904910  | 2868231  | 2827721  |
| Luxembourg          | 488650   | 497783   | 506953   | 518347   | 530946   | 543360   | 556319   | 569604   | 582014   | 599449   |
| Malta               | 409379   | 412477   | 414508   | 416268   | 420028   | 425967   | 434558   | 445053   | 455356   | 465292   |
| Netherlands         | 16445593 | 16530388 | 16615394 | 16693074 | 16754962 | 16804432 | 16865008 | 16939923 | 17030314 | 17132854 |
| New Zealand         | 4259800  | 4302600  | 4350700  | 4384000  | 4408100  | 4442100  | 4509700  | 4595700  | 4693200  | 4793900  |

|                      |          |          |          |          |          |          |          |          |          |          |
|----------------------|----------|----------|----------|----------|----------|----------|----------|----------|----------|----------|
| Norway               | 4768212  | 4828726  | 4889252  | 4953088  | 5018573  | 5079623  | 5137232  | 5190239  | 5234519  | 5282223  |
| Oman                 | 2759014  | 2882942  | 3041460  | 3237268  | 3464644  | 3711481  | 3960925  | 4199810  | 4424762  | 4636262  |
| Panama               | 3516268  | 3579385  | 3643222  | 3707782  | 3772938  | 3838462  | 3903986  | 3969249  | 4034119  | 4098587  |
| Poland               | 38125759 | 38151603 | 38042794 | 38063255 | 38063164 | 38040196 | 38011735 | 37986412 | 37970087 | 37975841 |
| Portugal             | 10558177 | 10568247 | 10573100 | 10557560 | 10514844 | 10457295 | 10401062 | 10358076 | 10325452 | 10293718 |
| Qatar                | 1389342  | 1590780  | 1779676  | 1952054  | 2109568  | 2250473  | 2374419  | 2481539  | 2569804  | 2639211  |
| Saudi Arabia         | 25940770 | 26661492 | 27425676 | 28238020 | 29086357 | 29944476 | 30776722 | 31557144 | 32275687 | 32938213 |
| Seychelles           | 86956    | 87298    | 89770    | 87441    | 88303    | 89949    | 91359    | 93419    | 94677    | 95843    |
| Singapore            | 4839396  | 4987573  | 5076732  | 5183688  | 5312437  | 5399162  | 5469724  | 5535002  | 5607283  | 5612253  |
| Slovakia             | 5379233  | 5386406  | 5391428  | 5398384  | 5407579  | 5413393  | 5418649  | 5423801  | 5430798  | 5439892  |
| Slovenia             | 2021316  | 2039669  | 2048583  | 2052843  | 2057159  | 2059953  | 2061980  | 2063531  | 2065042  | 2066748  |
| Spain                | 45954106 | 46362946 | 46576897 | 46742697 | 46773055 | 46620045 | 46480882 | 46444832 | 46484062 | 46572028 |
| Sweden               | 9219637  | 9298515  | 9378126  | 9449213  | 9519374  | 9600379  | 9696110  | 9799186  | 9923085  | 10067744 |
| Switzerland          | 7647675  | 7743831  | 7824909  | 7912398  | 7996861  | 8089346  | 8188649  | 8282396  | 8373338  | 8466017  |
| The Bahamas          | 348676   | 354856   | 360832   | 366568   | 372039   | 377240   | 382169   | 386838   | 391232   | 395361   |
| Trinidad and Tobago  | 1315372  | 1321618  | 1328100  | 1334788  | 1341588  | 1348248  | 1354493  | 1360092  | 1364962  | 1369125  |
| United Arab Emirates | 6894278  | 7666393  | 8270684  | 8672475  | 8900453  | 9006263  | 9070867  | 9154302  | 9269612  | 9400145  |
| United Kingdom       | 61806995 | 62276270 | 62766365 | 63258918 | 63700300 | 64128226 | 64613160 | 65128861 | 65595565 | 66022273 |
| United States        | 3.04E+08 | 3.07E+08 | 3.09E+08 | 3.12E+08 | 3.14E+08 | 3.16E+08 | 3.19E+08 | 3.21E+08 | 3.23E+08 | 3.26E+08 |
| Uruguay              | 3350824  | 3362755  | 3374415  | 3385624  | 3396777  | 3408005  | 3419546  | 3431552  | 3444006  | 3456750  |

Total population- Upper Middle income countries (2008-2017)

| country name           | 2008     | 2009     | 2010     | 2011     | 2012     | 2013     | 2014     | 2015     | 2016     | 2017     |
|------------------------|----------|----------|----------|----------|----------|----------|----------|----------|----------|----------|
| Albania                | 2947314  | 2927519  | 2913021  | 2905195  | 2900401  | 2895092  | 2889104  | 2880703  | 2876101  | 2873457  |
| Algeria                | 34860715 | 35465760 | 36117637 | 36819558 | 37565847 | 38338562 | 39113313 | 39871528 | 40606052 | 41318142 |
| Armenia                | 2908220  | 2888584  | 2877311  | 2875581  | 2881922  | 2893509  | 2906220  | 2916950  | 2924816  | 2930450  |
| Azerbaijan             | 8763400  | 8947243  | 9054332  | 9173082  | 9295784  | 9416801  | 9535079  | 9649341  | 9757812  | 9862429  |
| Belarus                | 9527985  | 9506765  | 9490583  | 9473172  | 9464495  | 9465997  | 9474511  | 9489616  | 9501534  | 9507875  |
| Belize                 | 306165   | 313929   | 321608   | 329192   | 336701   | 344181   | 351694   | 359288   | 366954   | 374681   |
| Bosnia and Herzegovina | 3763599  | 3746561  | 3722084  | 3688865  | 3648200  | 3604999  | 3566002  | 3535961  | 3516816  | 3507017  |
| Botswana               | 1946351  | 1979882  | 2014866  | 2051339  | 2089315  | 2128507  | 2168573  | 2209197  | 2250260  | 2291661  |
| Brazil                 | 1.93E+08 | 1.95E+08 | 1.97E+08 | 1.99E+08 | 2.01E+08 | 2.02E+08 | 2.04E+08 | 2.06E+08 | 2.08E+08 | 2.09E+08 |
| Bulgaria               | 7492561  | 7444443  | 7395599  | 7348328  | 7305888  | 7265115  | 7223938  | 7177991  | 7127822  | 7075991  |
| China                  | 1.32E+09 | 1.33E+09 | 1.34E+09 | 1.34E+09 | 1.35E+09 | 1.36E+09 | 1.36E+09 | 1.37E+09 | 1.38E+09 | 1.39E+09 |
| Colombia               | 44901544 | 45416181 | 45918097 | 46406646 | 46881475 | 47342981 | 47791911 | 48228697 | 48653419 | 49065615 |
| Costa Rica             | 4429508  | 4488263  | 4545280  | 4600474  | 4654122  | 4706401  | 4757575  | 4807852  | 4857274  | 4905769  |
| Cuba                   | 11309754 | 11318602 | 11333051 | 11354651 | 11382146 | 11412167 | 11439767 | 11461432 | 11475982 | 11484636 |
| Dominica               | 71074    | 71229    | 71440    | 71718    | 72044    | 72400    | 72778    | 73162    | 73543    | 73925    |
| Dominican Republic     | 9636520  | 9767758  | 9897985  | 10027095 | 10154950 | 10281296 | 10405844 | 10528394 | 10648791 | 10766998 |
| Ecuador                | 14447562 | 14691275 | 14934690 | 15177355 | 15419666 | 15661547 | 15903112 | 16144368 | 16385068 | 16624858 |
| Equatorial Guinea      | 868418   | 909111   | 951104   | 994290   | 1038593  | 1083746  | 1129424  | 1175389  | 1221490  | 1267689  |
| Fiji                   | 843340   | 851967   | 859950   | 867086   | 873596   | 879715   | 885806   | 892149   | 898760   | 905502   |
| Gabon                  | 1536411  | 1586754  | 1640210  | 1697101  | 1756817  | 1817271  | 1875713  | 1930175  | 1979786  | 2025137  |
| Grenada                | 103930   | 104296   | 104677   | 105075   | 105481   | 105909   | 106360   | 106823   | 107317   | 107825   |
| Guatemala              | 14006366 | 14316208 | 14630417 | 14948919 | 15271056 | 15596214 | 15923559 | 16252429 | 16582469 | 16913503 |
| Guyana                 | 746314   | 745693   | 746556   | 749100   | 753091   | 758081   | 763393   | 768514   | 773303   | 777859   |
| Iran                   | 72845542 | 73687565 | 74567511 | 75491582 | 76453574 | 77435384 | 78411092 | 79360487 | 80277428 | 81162788 |
| Iraq                   | 29111417 | 29894652 | 30762701 | 31727053 | 32776571 | 33883145 | 35006080 | 36115649 | 37202572 | 38274618 |
| Jamaica                | 2790122  | 2804082  | 2817210  | 2829493  | 2840992  | 2851807  | 2862087  | 2871934  | 2881355  | 2890299  |
| Jordan                 | 6489822  | 6821116  | 7182390  | 7574943  | 7992573  | 8413464  | 8809306  | 9159302  | 9455802  | 9702353  |
| Kazakhstan             | 15674000 | 16092822 | 16321872 | 16557201 | 16792089 | 17035550 | 17288285 | 17542806 | 17794055 | 18037646 |
| Libya                  | 6053078  | 6121053  | 6169140  | 6193501  | 6198258  | 6195970  | 6204108  | 6234955  | 6293253  | 6374616  |
| Macedonia              | 2067378  | 2069093  | 2070739  | 2072383  | 2074036  | 2075739  | 2077495  | 2079308  | 2081206  | 2083160  |
| Malaysia               | 27111069 | 27605383 | 28112289 | 28635128 | 29170456 | 29706724 | 30228017 | 30723155 | 31187265 | 31624264 |
| Maldives               | 345054   | 354501   | 364511   | 375131   | 386203   | 397397   | 408247   | 418403   | 427756   | 436330   |

|                                  |          |          |          |          |          |          |          |          |          |          |
|----------------------------------|----------|----------|----------|----------|----------|----------|----------|----------|----------|----------|
| Marshall Islands                 | 52218    | 52320    | 52425    | 52542    | 52663    | 52793    | 52898    | 52994    | 53066    | 53127    |
| Mauritius                        | 1244121  | 1247429  | 1250400  | 1252404  | 1255882  | 1258653  | 1260934  | 1262605  | 1263473  | 1264613  |
| Mexico                           | 1.14E+08 | 1.16E+08 | 1.17E+08 | 1.19E+08 | 1.21E+08 | 1.23E+08 | 1.24E+08 | 1.26E+08 | 1.28E+08 | 1.29E+08 |
| Montenegro                       | 616969   | 618294   | 619428   | 620079   | 620601   | 621207   | 621810   | 622159   | 622303   | 622471   |
| Namibia                          | 2106375  | 2137040  | 2173170  | 2215621  | 2263934  | 2316520  | 2370992  | 2425561  | 2479713  | 2533794  |
| Paraguay                         | 6047117  | 6127837  | 6209877  | 6293783  | 6379219  | 6465740  | 6552584  | 6639119  | 6725308  | 6811297  |
| Peru                             | 28641980 | 29001507 | 29373646 | 29759989 | 30158966 | 30565716 | 30973354 | 31376671 | 31773839 | 32165485 |
| Romania                          | 20537875 | 20367487 | 20246871 | 20147528 | 20058035 | 19983693 | 19908979 | 19815481 | 19702332 | 19586539 |
| Russian Federation               | 1.43E+08 | 1.43E+08 | 1.43E+08 | 1.43E+08 | 1.43E+08 | 1.44E+08 | 1.44E+08 | 1.44E+08 | 1.44E+08 | 1.44E+08 |
| Saint Lucia                      | 169220   | 171022   | 172580   | 173832   | 174835   | 175660   | 176421   | 177206   | 178015   | 178844   |
| Saint Vincent and the Grenadines | 109165   | 109253   | 109315   | 109341   | 109328   | 109320   | 109357   | 109455   | 109643   | 109897   |
| Samoa                            | 183526   | 184826   | 186205   | 187665   | 189194   | 190757   | 192290   | 193759   | 195125   | 196440   |
| Serbia                           | 7350222  | 7320807  | 7291436  | 7234099  | 7199077  | 7164132  | 7130576  | 7095383  | 7058322  | 7022268  |
| South Africa                     | 50412129 | 50970818 | 51584663 | 52263516 | 52998213 | 53767396 | 54539571 | 55291225 | 56015473 | 56717156 |
| Suriname                         | 515148   | 520619   | 526103   | 531589   | 537077   | 542540   | 547928   | 553208   | 558368   | 563402   |
| Thailand                         | 66545760 | 66881867 | 67208808 | 67530130 | 67843979 | 68143065 | 68416772 | 68657600 | 68863514 | 69037513 |
| Tonga                            | 103005   | 103604   | 104137   | 104577   | 104951   | 105328   | 105782   | 106364   | 107122   | 108020   |
| Turkey                           | 70440032 | 71339185 | 72326914 | 73409455 | 74569867 | 75787333 | 77030628 | 78271472 | 79512426 | 80745020 |
| Turkmenistan                     | 4935762  | 5007950  | 5087210  | 5174061  | 5267839  | 5366277  | 5466241  | 5565284  | 5662544  | 5758075  |
| Venezuela                        | 28141701 | 28587323 | 29028033 | 29463291 | 29893080 | 30317848 | 30738378 | 31155134 | 31568179 | 31977065 |

Total population- Lower Middle income countries (2008-2017)

| country name                   | 2008     | 2009     | 2010     | 2011     | 2012     | 2013     | 2014     | 2015     | 2016     | 2017     |
|--------------------------------|----------|----------|----------|----------|----------|----------|----------|----------|----------|----------|
| Angola                         | 21759420 | 22549547 | 23369131 | 24218565 | 25096150 | 25998340 | 26920466 | 27859305 | 28813463 | 29784193 |
| Bangladesh                     | 1.49E+08 | 1.5E+08  | 1.52E+08 | 1.54E+08 | 1.56E+08 | 1.58E+08 | 1.59E+08 | 1.61E+08 | 1.63E+08 | 1.65E+08 |
| Bhutan                         | 700950   | 714458   | 727641   | 740510   | 752967   | 764961   | 776448   | 787386   | 797765   | 807610   |
| Bolivia                        | 9599855  | 9758748  | 9918242  | 10078343 | 10239004 | 10400264 | 10562159 | 10724705 | 10887882 | 11051600 |
| Cambodia                       | 13880509 | 14090208 | 14308740 | 14537886 | 14776866 | 15022692 | 15270790 | 15517635 | 15762370 | 16005373 |
| Cameroon                       | 18907008 | 19432541 | 19970495 | 20520447 | 21082383 | 21655715 | 22239904 | 22834522 | 23439189 | 24053727 |
| Cape Verde                     | 491723   | 496963   | 502384   | 508067   | 513979   | 520106   | 526437   | 532913   | 539560   | 546388   |
| Congo                          | 4115435  | 4253712  | 4386693  | 4512730  | 4633363  | 4751393  | 4871101  | 4995648  | 5125821  | 5260750  |
| Cote d'Ivoire                  | 19497986 | 19936366 | 20401331 | 20895311 | 21418603 | 21966312 | 22531350 | 23108472 | 23695919 | 24294750 |
| Djibouti                       | 822934   | 836840   | 851146   | 865937   | 881185   | 896688   | 912164   | 927414   | 942333   | 956985   |
| Egypt                          | 80953881 | 82465022 | 84107606 | 85897561 | 87813257 | 89807433 | 91812566 | 93778172 | 95688681 | 97553151 |
| El Salvador                    | 6110301  | 6137276  | 6164626  | 6192560  | 6221246  | 6250777  | 6281189  | 6312478  | 6344722  | 6377853  |
| Federated States of Micronesia | 104478   | 103960   | 103616   | 103468   | 103503   | 103702   | 104015   | 104433   | 104937   | 105544   |
| Georgia                        | 4030000  | 3978000  | 3926000  | 3875000  | 3825000  | 3776000  | 3727000  | 3717100  | 3719300  | 3717100  |
| Ghana                          | 23298640 | 23903831 | 24512104 | 25121796 | 25733049 | 26346251 | 26962563 | 27582821 | 28206728 | 28833629 |
| Honduras                       | 7872658  | 8035021  | 8194778  | 8351600  | 8505646  | 8657785  | 8809216  | 8960829  | 9112867  | 9265067  |
| India                          | 1.2E+09  | 1.21E+09 | 1.23E+09 | 1.25E+09 | 1.26E+09 | 1.28E+09 | 1.29E+09 | 1.31E+09 | 1.32E+09 | 1.34E+09 |
| Indonesia                      | 2.36E+08 | 2.39E+08 | 2.43E+08 | 2.46E+08 | 2.49E+08 | 2.52E+08 | 2.55E+08 | 2.58E+08 | 2.61E+08 | 2.64E+08 |
| Kenya                          | 39148416 | 40237204 | 41350152 | 42486839 | 43646629 | 44826849 | 46024250 | 47236259 | 48461567 | 49699862 |
| Kiribati                       | 98440    | 100568   | 102652   | 104656   | 106613   | 108535   | 110458   | 112407   | 114395   | 116398   |
| Kyrgyzstan                     | 5318700  | 5383300  | 5447900  | 5514600  | 5607200  | 5719600  | 5835500  | 5956900  | 6079500  | 6201500  |
| Laos                           | 6052190  | 6152036  | 6246274  | 6333487  | 6415169  | 6494557  | 6576397  | 6663967  | 6758353  | 6858160  |
| Lesotho                        | 1999930  | 2019209  | 2040551  | 2064166  | 2089928  | 2117361  | 2145785  | 2174645  | 2203821  | 2233339  |
| Mauritania                     | 3407541  | 3506288  | 3609543  | 3717672  | 3830239  | 3946170  | 4063920  | 4182341  | 4301018  | 4420184  |
| Moldova                        | 3570108  | 3565604  | 3562045  | 3559986  | 3559519  | 3558566  | 3556397  | 3554108  | 3551954  | 3549750  |
| Mongolia                       | 2628131  | 2668289  | 2712650  | 2761516  | 2814226  | 2869107  | 2923896  | 2976877  | 3027398  | 3075647  |
| Morocco                        | 31596855 | 31989897 | 32409639 | 32858823 | 33333789 | 33824769 | 34318082 | 34803322 | 35276786 | 35739580 |
| Myanmar                        | 49479752 | 49800690 | 50155896 | 50553031 | 50986514 | 51448196 | 51924182 | 52403669 | 52885223 | 53370609 |
| Nicaragua                      | 5594506  | 5666581  | 5737723  | 5807820  | 5877108  | 5945747  | 6013997  | 6082035  | 6149928  | 6217581  |
| Nigeria                        | 1.5E+08  | 1.54E+08 | 1.59E+08 | 1.63E+08 | 1.67E+08 | 1.72E+08 | 1.76E+08 | 1.81E+08 | 1.86E+08 | 1.91E+08 |
| Pakistan                       | 1.64E+08 | 1.67E+08 | 1.71E+08 | 1.74E+08 | 1.78E+08 | 1.82E+08 | 1.86E+08 | 1.89E+08 | 1.93E+08 | 1.97E+08 |
| Papua New Guinea               | 6787187  | 6947447  | 7108239  | 7269348  | 7430836  | 7592865  | 7755785  | 7919825  | 8084991  | 8251162  |

|                       |          |          |          |          |          |          |          |          |          |          |
|-----------------------|----------|----------|----------|----------|----------|----------|----------|----------|----------|----------|
| Philippines           | 90751864 | 92220879 | 93726624 | 95277940 | 96866642 | 98481032 | 1E+08    | 1.02E+08 | 1.03E+08 | 1.05E+08 |
| Sao Tome and Principe | 166913   | 170813   | 174776   | 178800   | 182889   | 187045   | 191266   | 195553   | 199910   | 204327   |
| Solomon Islands       | 504477   | 516079   | 527790   | 539614   | 551531   | 563513   | 575504   | 587482   | 599419   | 611343   |
| Sri Lanka             | 19945832 | 20075086 | 20198353 | 20315017 | 20425000 | 20585000 | 20771000 | 20966000 | 21203000 | 21444000 |
| Sudan                 | 32955496 | 33650619 | 34385963 | 35167314 | 35990192 | 36849918 | 37737913 | 38647803 | 39578828 | 40533330 |
| Timor-Leste           | 1078110  | 1092021  | 1109591  | 1131523  | 1156760  | 1184366  | 1212814  | 1240977  | 1268671  | 1296311  |
| Tunisia               | 10407336 | 10521834 | 10639931 | 10761467 | 10886668 | 11014558 | 11143908 | 11273661 | 11403248 | 11532127 |
| Ukraine               | 46258200 | 46053300 | 45870700 | 45706100 | 45593300 | 45489600 | 45271947 | 45154029 | 45004645 | 44831159 |
| Uzbekistan            | 27302800 | 27767400 | 28562400 | 29339400 | 29774500 | 30243200 | 30757700 | 31298900 | 31847900 | 32387200 |
| Vanuatu               | 225340   | 230785   | 236295   | 241871   | 247485   | 253142   | 258850   | 264603   | 270402   | 276244   |
| Vietnam               | 86707801 | 87565407 | 88472512 | 89436644 | 90451881 | 91497725 | 92544915 | 93571567 | 94569072 | 95540800 |
| Zambia                | 13082517 | 13456417 | 13850033 | 14264756 | 14699937 | 15153210 | 15620974 | 16100587 | 16591390 | 17094130 |

Total population- Low income countries (2008-2017)

| country name                 | 2008     | 2009     | 2010     | 2011     | 2012     | 2013     | 2014     | 2015     | 2016     | 2017     |
|------------------------------|----------|----------|----------|----------|----------|----------|----------|----------|----------|----------|
| Afghanistan                  | 27294031 | 28004331 | 28803167 | 29708599 | 30696958 | 31731688 | 32758020 | 33736494 | 34656032 | 35530081 |
| Benin                        | 8696916  | 8944706  | 9199259  | 9460802  | 9729160  | 10004451 | 10286712 | 10575952 | 10872298 | 11175692 |
| Burkina Faso                 | 14689726 | 15141099 | 15605217 | 16081904 | 16571216 | 17072723 | 17585977 | 18110624 | 18646433 | 19193382 |
| Burundi                      | 8212264  | 8489031  | 8766930  | 9043508  | 9319710  | 9600186  | 9891790  | 10199270 | 10524117 | 10864245 |
| Central African Republic     | 4345386  | 4404230  | 4448525  | 4476153  | 4490416  | 4499653  | 4515392  | 4546100  | 4594621  | 4659080  |
| Chad                         | 11133861 | 11502786 | 11887202 | 12288651 | 12705135 | 13133589 | 13569438 | 14009413 | 14452543 | 14899994 |
| Comoros                      | 657229   | 673252   | 689692   | 706569   | 723868   | 741500   | 759385   | 777424   | 795601   | 813912   |
| Democratic republic of Congo | 60373608 | 62409435 | 64523263 | 66713597 | 68978682 | 71316033 | 73722860 | 76196619 | 78736153 | 81339988 |
| Eritrea                      | 4232636  | 4310334  | 4390840  | 4474690  | 4474690  | 4474690  | 4474690  | 4474690  | 4474690  | 4474690  |
| Ethiopia                     | 83184892 | 85416253 | 87702670 | 90046756 | 92444183 | 94887724 | 97366774 | 99873033 | 1.02E+08 | 1.05E+08 |
| Guinea                       | 10323142 | 10556524 | 10794170 | 11035170 | 11281469 | 11536615 | 11805509 | 12091533 | 12395924 | 12717176 |
| Guinea-Bissau                | 1480841  | 1517448  | 1555880  | 1596154  | 1638139  | 1681495  | 1725744  | 1770526  | 1815698  | 1861283  |
| Haiti                        | 9705029  | 9852870  | 9999617  | 10145054 | 10289210 | 10431776 | 10572466 | 10711061 | 10847334 | 10981229 |
| Liberia                      | 3662993  | 3811528  | 3948125  | 4070167  | 4181563  | 4286291  | 4390737  | 4499621  | 4613823  | 4731906  |
| Madagascar                   | 19996469 | 20569121 | 21151640 | 21743949 | 22346573 | 22961146 | 23589801 | 24234088 | 24894551 | 25570895 |
| Malawi                       | 14271234 | 14714602 | 15167095 | 15627618 | 16097305 | 16577147 | 17068838 | 17573607 | 18091575 | 18622104 |
| Mali                         | 14138216 | 14606597 | 15075085 | 15540989 | 16006670 | 16477818 | 16962846 | 17467905 | 17994837 | 18541980 |
| Mozambique                   | 22846758 | 23524063 | 24221405 | 24939005 | 25676606 | 26434372 | 27212382 | 28010691 | 28829476 | 29668834 |
| Nepal                        | 26475859 | 26741103 | 27023137 | 27327147 | 27649925 | 27985310 | 28323241 | 28656282 | 28982771 | 29304998 |
| Niger                        | 15228525 | 15813913 | 16425578 | 17064636 | 17731634 | 18426372 | 19148219 | 19896965 | 20672987 | 21477348 |
| North Korea                  | 24335146 | 24463021 | 24591599 | 24722298 | 24854034 | 24985976 | 25116363 | 25243917 | 25368620 | 25490965 |
| Rwanda                       | 9708169  | 9977446  | 10246842 | 10516071 | 10788853 | 11065151 | 11345357 | 11629553 | 11917508 | 12208407 |
| Senegal                      | 12203957 | 12550917 | 12916229 | 13300910 | 13703513 | 14120320 | 14546111 | 14976994 | 15411614 | 15850567 |
| Sierra Leone                 | 6165372  | 6310260  | 6458720  | 6611692  | 6766103  | 6922079  | 7079162  | 7237025  | 7396190  | 7557212  |
| South Sudan                  | 9263136  | 9670667  | 10067192 | 10448857 | 10818258 | 11177490 | 11530971 | 11882136 | 12230730 | 12575714 |
| Syria                        | 20325443 | 20824893 | 21018834 | 20863993 | 20420701 | 19809141 | 19203090 | 18734987 | 18430453 | 18269868 |
| Tajikistan                   | 7309728  | 7472819  | 7641630  | 7815949  | 7995062  | 8177809  | 8362745  | 8548651  | 8734951  | 8921343  |
| Tanzania                     | 43270144 | 44664231 | 46098591 | 47570902 | 49082997 | 50636595 | 52234869 | 53879957 | 55572201 | 57310019 |
| The Gambia                   | 1588572  | 1639560  | 1692149  | 1746363  | 1802125  | 1859324  | 1917852  | 1977590  | 2038501  | 2100568  |
| Togo                         | 6161796  | 6330472  | 6502952  | 6679282  | 6859482  | 7042948  | 7228915  | 7416802  | 7606374  | 7797694  |
| Uganda                       | 31663896 | 32771895 | 33915133 | 35093648 | 36306796 | 37553726 | 38833338 | 40144870 | 41487965 | 42862958 |
| Yemen                        | 22356391 | 22974929 | 23606779 | 24252206 | 24909969 | 25576322 | 26246327 | 26916207 | 27584213 | 28250420 |

|          |          |          |          |          |          |          |          |          |          |          |
|----------|----------|----------|----------|----------|----------|----------|----------|----------|----------|----------|
| Zimbabwe | 13558469 | 13810599 | 14086317 | 14386649 | 14710826 | 15054506 | 15411675 | 15777451 | 16150362 | 16529904 |
|----------|----------|----------|----------|----------|----------|----------|----------|----------|----------|----------|
