# Supplementary material for: Disparities in Cardiovascular Research Output and Disease Outcomes among High-, Middle- and Low-Income Countries – An Analysis of Global Cardiovascular Publications over the Last Decade (2008–2017)
Source: PubMed Central journal article supplement (PMC7845477; doi:10.5334/gh.815), 2021-01-18
Supplement: gh-16-1-815-s7.pdf [file gh-16-1-815-s7.pdf]

## Human Development Index- High Income countries (2008-2017)

| Country             | 2008  | 2009  | 2010  | 2011  | 2012  | 2013  | 2014  | 2015  | 2016  | 2017  |
|---------------------|-------|-------|-------|-------|-------|-------|-------|-------|-------|-------|
| Andorra             | 0.831 | 0.83  | 0.828 | 0.827 | 0.849 | 0.85  | 0.853 | 0.854 | 0.856 | 0.858 |
| Antigua and Barbuda | 0.777 | 0.77  | 0.766 | 0.762 | 0.765 | 0.768 | 0.77  | 0.775 | 0.778 | 0.78  |
| Argentina           | 0.795 | 0.799 | 0.813 | 0.819 | 0.818 | 0.82  | 0.82  | 0.822 | 0.822 | 0.825 |
| Australia           | 0.92  | 0.921 | 0.923 | 0.925 | 0.929 | 0.931 | 0.933 | 0.936 | 0.938 | 0.939 |
| Austria             | 0.884 | 0.886 | 0.895 | 0.897 | 0.899 | 0.897 | 0.901 | 0.903 | 0.906 | 0.908 |
| Bahrain             | 0.796 | 0.794 | 0.796 | 0.798 | 0.8   | 0.807 | 0.81  | 0.832 | 0.846 | 0.846 |
| Barbados            | 0.781 | 0.783 | 0.782 | 0.787 | 0.795 | 0.796 | 0.796 | 0.797 | 0.799 | 0.8   |
| Belgium             | 0.899 | 0.899 | 0.903 | 0.904 | 0.905 | 0.908 | 0.909 | 0.913 | 0.915 | 0.916 |
| Brunei              | 0.84  | 0.842 | 0.842 | 0.846 | 0.852 | 0.853 | 0.853 | 0.852 | 0.852 | 0.853 |
| Canada              | 0.899 | 0.899 | 0.902 | 0.905 | 0.908 | 0.911 | 0.918 | 0.92  | 0.922 | 0.926 |
| Chile               | 0.806 | 0.804 | 0.808 | 0.814 | 0.819 | 0.828 | 0.833 | 0.84  | 0.842 | 0.843 |
| Croatia             | 0.803 | 0.802 | 0.808 | 0.815 | 0.816 | 0.821 | 0.824 | 0.827 | 0.828 | 0.831 |
| Cyprus              | 0.852 | 0.856 | 0.85  | 0.853 | 0.852 | 0.853 | 0.856 | 0.86  | 0.867 | 0.869 |
| Czech Republic      | 0.854 | 0.857 | 0.862 | 0.865 | 0.865 | 0.874 | 0.879 | 0.882 | 0.885 | 0.888 |
| Denmark             | 0.909 | 0.906 | 0.91  | 0.922 | 0.924 | 0.931 | 0.928 | 0.926 | 0.928 | 0.929 |
| Estonia             | 0.841 | 0.839 | 0.845 | 0.853 | 0.859 | 0.862 | 0.864 | 0.866 | 0.868 | 0.871 |
| Finland             | 0.904 | 0.899 | 0.903 | 0.907 | 0.908 | 0.912 | 0.914 | 0.915 | 0.918 | 0.92  |
| Germany             | 0.917 | 0.917 | 0.921 | 0.926 | 0.928 | 0.928 | 0.93  | 0.933 | 0.934 | 0.936 |
| Greece              | 0.857 | 0.858 | 0.856 | 0.852 | 0.854 | 0.856 | 0.864 | 0.866 | 0.868 | 0.87  |
| Hungary             | 0.818 | 0.818 | 0.823 | 0.827 | 0.83  | 0.835 | 0.833 | 0.834 | 0.835 | 0.838 |
| Iceland             | 0.89  | 0.89  | 0.891 | 0.901 | 0.909 | 0.92  | 0.925 | 0.927 | 0.933 | 0.935 |
| Ireland             | 0.908 | 0.906 | 0.909 | 0.895 | 0.902 | 0.911 | 0.921 | 0.929 | 0.934 | 0.938 |
| Israel              | 0.88  | 0.882 | 0.887 | 0.892 | 0.893 | 0.895 | 0.899 | 0.901 | 0.902 | 0.903 |
| Italy               | 0.868 | 0.868 | 0.87  | 0.875 | 0.874 | 0.876 | 0.874 | 0.876 | 0.878 | 0.88  |
| Japan               | 0.881 | 0.88  | 0.885 | 0.89  | 0.895 | 0.899 | 0.903 | 0.905 | 0.907 | 0.909 |
| Kuwait              | 0.789 | 0.79  | 0.792 | 0.794 | 0.796 | 0.795 | 0.799 | 0.802 | 0.804 | 0.803 |
| Latvia              | 0.821 | 0.818 | 0.816 | 0.821 | 0.824 | 0.833 | 0.838 | 0.841 | 0.844 | 0.847 |
| Lithuania           | 0.831 | 0.822 | 0.824 | 0.828 | 0.831 | 0.836 | 0.851 | 0.852 | 0.855 | 0.858 |
| Luxembourg          | 0.89  | 0.883 | 0.889 | 0.892 | 0.892 | 0.892 | 0.895 | 0.899 | 0.904 | 0.904 |
| Malta               | 0.829 | 0.83  | 0.843 | 0.843 | 0.849 | 0.856 | 0.862 | 0.871 | 0.875 | 0.878 |
| Netherlands         | 0.906 | 0.906 | 0.91  | 0.921 | 0.921 | 0.923 | 0.924 | 0.926 | 0.928 | 0.931 |
| New Zealand         | 0.894 | 0.898 | 0.899 | 0.902 | 0.905 | 0.907 | 0.91  | 0.914 | 0.915 | 0.917 |

|                      |       |       |       |       |       |       |       |       |       |       |
|----------------------|-------|-------|-------|-------|-------|-------|-------|-------|-------|-------|
| Norway               | 0.938 | 0.938 | 0.942 | 0.943 | 0.942 | 0.946 | 0.946 | 0.948 | 0.951 | 0.953 |
| Oman                 | 0.782 | 0.789 | 0.793 | 0.795 | 0.804 | 0.812 | 0.815 | 0.822 | 0.822 | 0.821 |
| Panama               | 0.755 | 0.756 | 0.758 | 0.764 | 0.771 | 0.776 | 0.781 | 0.781 | 0.785 | 0.789 |
| Poland               | 0.824 | 0.828 | 0.835 | 0.839 | 0.836 | 0.85  | 0.842 | 0.855 | 0.86  | 0.865 |
| Portugal             | 0.814 | 0.817 | 0.822 | 0.826 | 0.829 | 0.837 | 0.839 | 0.842 | 0.845 | 0.847 |
| Qatar                | 0.835 | 0.833 | 0.825 | 0.836 | 0.844 | 0.854 | 0.853 | 0.854 | 0.855 | 0.856 |
| Saudi Arabia         | 0.791 | 0.796 | 0.808 | 0.823 | 0.835 | 0.844 | 0.852 | 0.854 | 0.854 | 0.853 |
| Seychelles           | 0.741 | 0.741 | 0.747 | 0.741 | 0.77  | 0.779 | 0.786 | 0.791 | 0.793 | 0.797 |
| Singapore            | 0.883 | 0.884 | 0.909 | 0.914 | 0.92  | 0.923 | 0.928 | 0.929 | 0.93  | 0.932 |
| Slovakia             | 0.822 | 0.824 | 0.829 | 0.837 | 0.842 | 0.844 | 0.845 | 0.851 | 0.853 | 0.855 |
| Slovenia             | 0.878 | 0.878 | 0.882 | 0.884 | 0.877 | 0.885 | 0.887 | 0.889 | 0.894 | 0.896 |
| Spain                | 0.856 | 0.858 | 0.865 | 0.87  | 0.873 | 0.875 | 0.88  | 0.885 | 0.889 | 0.891 |
| Sweden               | 0.901 | 0.899 | 0.905 | 0.906 | 0.908 | 0.912 | 0.92  | 0.929 | 0.932 | 0.933 |
| Switzerland          | 0.917 | 0.927 | 0.932 | 0.932 | 0.935 | 0.938 | 0.939 | 0.942 | 0.943 | 0.944 |
| The Bahamas          | 0.79  | 0.787 | 0.789 | 0.793 | 0.807 | 0.807 | 0.807 | 0.807 | 0.806 | 0.807 |
| Trinidad and Tobago  | 0.773 | 0.772 | 0.775 | 0.773 | 0.774 | 0.779 | 0.779 | 0.783 | 0.785 | 0.784 |
| United Arab Emirates | 0.838 | 0.835 | 0.836 | 0.841 | 0.846 | 0.851 | 0.855 | 0.86  | 0.862 | 0.863 |
| United Kingdom       | 0.896 | 0.899 | 0.905 | 0.899 | 0.898 | 0.915 | 0.919 | 0.918 | 0.92  | 0.922 |
| United States        | 0.91  | 0.91  | 0.914 | 0.917 | 0.918 | 0.916 | 0.918 | 0.92  | 0.922 | 0.924 |
| Uruguay              | 0.766 | 0.778 | 0.773 | 0.782 | 0.79  | 0.797 | 0.801 | 0.8   | 0.802 | 0.804 |

## Human Development Index- Upper Middle Income countries (2008-2017)

| Country name           | 2008  | 2009  | 2010  | 2011  | 2012  | 2013  | 2014  | 2015  | 2016  | 2017  |
|------------------------|-------|-------|-------|-------|-------|-------|-------|-------|-------|-------|
| Albania                | 0.724 | 0.729 | 0.741 | 0.752 | 0.767 | 0.771 | 0.773 | 0.776 | 0.782 | 0.785 |
| Algeria                | 0.709 | 0.719 | 0.729 | 0.736 | 0.74  | 0.745 | 0.747 | 0.749 | 0.753 | 0.754 |
| Armenia                | 0.727 | 0.724 | 0.728 | 0.731 | 0.737 | 0.742 | 0.745 | 0.748 | 0.749 | 0.755 |
| Azerbaijan             | 0.719 | 0.736 | 0.74  | 0.741 | 0.745 | 0.752 | 0.758 | 0.758 | 0.757 | 0.757 |
| Belarus                | 0.774 | 0.784 | 0.792 | 0.798 | 0.803 | 0.804 | 0.807 | 0.805 | 0.805 | 0.808 |
| Belize                 | 0.7   | 0.699 | 0.699 | 0.702 | 0.706 | 0.705 | 0.706 | 0.709 | 0.709 | 0.708 |
| Bosnia and Herzegovina | 0.719 | 0.72  | 0.713 | 0.721 | 0.739 | 0.747 | 0.754 | 0.755 | 0.766 | 0.768 |
| Botswana               | 0.639 | 0.648 | 0.66  | 0.673 | 0.683 | 0.693 | 0.701 | 0.706 | 0.712 | 0.717 |
| Brazil                 | 0.716 | 0.718 | 0.727 | 0.731 | 0.736 | 0.748 | 0.752 | 0.757 | 0.758 | 0.759 |
| Bulgaria               | 0.771 | 0.774 | 0.779 | 0.782 | 0.786 | 0.792 | 0.797 | 0.807 | 0.81  | 0.813 |
| China                  | 0.685 | 0.694 | 0.706 | 0.714 | 0.722 | 0.729 | 0.738 | 0.743 | 0.748 | 0.752 |
| Colombia               | 0.71  | 0.715 | 0.719 | 0.725 | 0.725 | 0.735 | 0.738 | 0.742 | 0.747 | 0.747 |
| Costa Rica             | 0.75  | 0.752 | 0.754 | 0.76  | 0.772 | 0.776 | 0.78  | 0.788 | 0.791 | 0.794 |
| Cuba                   | 0.78  | 0.782 | 0.779 | 0.778 | 0.767 | 0.765 | 0.768 | 0.772 | 0.774 | 0.777 |
| Dominica               | 0.72  | 0.72  | 0.722 | 0.722 | 0.721 | 0.721 | 0.724 | 0.721 | 0.718 | 0.715 |
| Dominican Republic     | 0.695 | 0.696 | 0.703 | 0.706 | 0.71  | 0.713 | 0.718 | 0.729 | 0.733 | 0.736 |
| Ecuador                | 0.711 | 0.712 | 0.715 | 0.721 | 0.726 | 0.734 | 0.742 | 0.743 | 0.749 | 0.752 |
| Equatorial Guinea      | 0.586 | 0.589 | 0.581 | 0.584 | 0.589 | 0.59  | 0.59  | 0.593 | 0.593 | 0.591 |
| Fiji                   | 0.703 | 0.707 | 0.711 | 0.717 | 0.719 | 0.727 | 0.73  | 0.738 | 0.738 | 0.741 |
| Gabon                  | 0.653 | 0.661 | 0.665 | 0.67  | 0.678 | 0.687 | 0.693 | 0.694 | 0.698 | 0.702 |
| Grenada                | 0.739 | 0.738 | 0.743 | 0.747 | 0.749 | 0.754 | 0.761 | 0.767 | 0.77  | 0.772 |
| Guatemala              | 0.598 | 0.604 | 0.611 | 0.619 | 0.613 | 0.616 | 0.643 | 0.645 | 0.649 | 0.65  |
| Guyana                 | 0.621 | 0.624 | 0.63  | 0.639 | 0.642 | 0.645 | 0.648 | 0.651 | 0.652 | 0.654 |
| Iran                   | 0.741 | 0.747 | 0.755 | 0.766 | 0.781 | 0.784 | 0.788 | 0.789 | 0.796 | 0.798 |
| Iraq                   | 0.643 | 0.646 | 0.649 | 0.656 | 0.659 | 0.666 | 0.666 | 0.668 | 0.672 | 0.685 |
| Jamaica                | 0.708 | 0.709 | 0.712 | 0.715 | 0.721 | 0.726 | 0.728 | 0.73  | 0.732 | 0.732 |
| Jordan                 | 0.736 | 0.734 | 0.728 | 0.726 | 0.726 | 0.727 | 0.73  | 0.733 | 0.735 | 0.735 |
| Kazakhstan             | 0.759 | 0.763 | 0.765 | 0.772 | 0.781 | 0.788 | 0.793 | 0.797 | 0.797 | 0.8   |
| Libya                  | 0.757 | 0.755 | 0.755 | 0.707 | 0.741 | 0.707 | 0.695 | 0.694 | 0.693 | 0.706 |
| Macedonia              | 0.728 | 0.731 | 0.735 | 0.738 | 0.74  | 0.743 | 0.747 | 0.754 | 0.756 | 0.757 |
| Malaysia               | 0.761 | 0.765 | 0.772 | 0.778 | 0.781 | 0.785 | 0.79  | 0.795 | 0.799 | 0.802 |
| Maldives               | 0.66  | 0.66  | 0.671 | 0.682 | 0.688 | 0.696 | 0.705 | 0.71  | 0.712 | 0.717 |

|                                  |       |       |       |       |       |       |       |       |       |       |
|----------------------------------|-------|-------|-------|-------|-------|-------|-------|-------|-------|-------|
| Marshall Islands                 |       |       |       | 0.708 | 0.708 | 0.708 | 0.708 | 0.708 | 0.708 | 0.708 |
| Mauritius                        | 0.734 | 0.741 | 0.749 | 0.758 | 0.767 | 0.772 | 0.782 | 0.782 | 0.788 | 0.79  |
| Mexico                           | 0.742 | 0.743 | 0.743 | 0.751 | 0.757 | 0.756 | 0.761 | 0.767 | 0.772 | 0.774 |
| Montenegro                       | 0.786 | 0.788 | 0.793 | 0.798 | 0.8   | 0.803 | 0.805 | 0.809 | 0.81  | 0.814 |
| Namibia                          | 0.575 | 0.583 | 0.594 | 0.607 | 0.617 | 0.628 | 0.636 | 0.642 | 0.645 | 0.647 |
| Paraguay                         | 0.664 | 0.659 | 0.675 | 0.68  | 0.68  | 0.695 | 0.698 | 0.702 | 0.702 | 0.702 |
| Peru                             | 0.712 | 0.715 | 0.717 | 0.729 | 0.729 | 0.736 | 0.746 | 0.745 | 0.748 | 0.75  |
| Romania                          | 0.795 | 0.798 | 0.797 | 0.798 | 0.795 | 0.8   | 0.802 | 0.805 | 0.807 | 0.811 |
| Russian Federation               | 0.774 | 0.771 | 0.78  | 0.789 | 0.798 | 0.804 | 0.807 | 0.813 | 0.815 | 0.816 |
| Saint Lucia                      | 0.719 | 0.724 | 0.731 | 0.734 | 0.73  | 0.733 | 0.737 | 0.744 | 0.745 | 0.747 |
| Saint Vincent and the Grenadines | 0.71  | 0.713 | 0.715 | 0.717 | 0.718 | 0.721 | 0.72  | 0.72  | 0.721 | 0.723 |
| Samoa                            | 0.685 | 0.687 | 0.693 | 0.697 | 0.697 | 0.7   | 0.703 | 0.706 | 0.711 | 0.713 |
| Serbia                           | 0.757 | 0.759 | 0.759 | 0.769 | 0.768 | 0.771 | 0.775 | 0.78  | 0.785 | 0.787 |
| South Africa                     | 0.633 | 0.642 | 0.649 | 0.657 | 0.664 | 0.675 | 0.685 | 0.692 | 0.696 | 0.699 |
| Suriname                         | 0.691 | 0.677 | 0.703 | 0.706 | 0.711 | 0.715 | 0.718 | 0.722 | 0.719 | 0.72  |
| Thailand                         | 0.714 | 0.718 | 0.724 | 0.727 | 0.731 | 0.728 | 0.735 | 0.741 | 0.748 | 0.755 |
| Tonga                            | 0.702 | 0.706 | 0.712 | 0.716 | 0.717 | 0.716 | 0.717 | 0.721 | 0.724 | 0.726 |
| Turkey                           | 0.71  | 0.718 | 0.734 | 0.753 | 0.76  | 0.771 | 0.778 | 0.783 | 0.787 | 0.791 |
| Turkmenistan                     |       |       | 0.673 | 0.68  | 0.686 | 0.692 | 0.697 | 0.701 | 0.705 | 0.706 |
| Venezuela                        | 0.753 | 0.753 | 0.759 | 0.771 | 0.774 | 0.776 | 0.778 | 0.775 | 0.766 | 0.761 |

## Human Development Index- Lower Middle Income countries (2008-2017)

| Country name                   | 2008  | 2009  | 2010  | 2011  | 2012  | 2013  | 2014  | 2015  | 2016  | 2017  |
|--------------------------------|-------|-------|-------|-------|-------|-------|-------|-------|-------|-------|
| Angola                         | 0.502 | 0.522 | 0.52  | 0.535 | 0.543 | 0.554 | 0.564 | 0.572 | 0.577 | 0.581 |
| Bangladesh                     | 0.523 | 0.535 | 0.545 | 0.557 | 0.567 | 0.575 | 0.583 | 0.592 | 0.597 | 0.608 |
| Bhutan                         | 0.543 | 0.554 | 0.566 | 0.575 | 0.585 | 0.589 | 0.599 | 0.603 | 0.609 | 0.612 |
| Bolivia                        | 0.64  | 0.647 | 0.649 | 0.655 | 0.662 | 0.668 | 0.675 | 0.681 | 0.689 | 0.693 |
| Cambodia                       | 0.521 | 0.521 | 0.537 | 0.546 | 0.553 | 0.56  | 0.566 | 0.571 | 0.576 | 0.582 |
| Cameroon                       | 0.492 | 0.499 | 0.506 | 0.515 | 0.526 | 0.535 | 0.543 | 0.548 | 0.553 | 0.556 |
| Cape Verde                     | 0.625 | 0.626 | 0.629 | 0.635 | 0.636 | 0.642 | 0.644 | 0.647 | 0.652 | 0.654 |
| Congo                          | 0.536 | 0.55  | 0.557 | 0.56  | 0.573 | 0.582 | 0.595 | 0.613 | 0.612 | 0.606 |
| Cote d'Ivoire                  | 0.43  | 0.437 | 0.442 | 0.445 | 0.454 | 0.462 | 0.465 | 0.478 | 0.486 | 0.492 |
| Djibouti                       | 0.435 | 0.441 | 0.449 | 0.454 | 0.459 | 0.463 | 0.467 | 0.47  | 0.474 | 0.476 |
| Egypt                          | 0.658 | 0.66  | 0.665 | 0.668 | 0.675 | 0.68  | 0.683 | 0.691 | 0.694 | 0.696 |
| El Salvador                    | 0.659 | 0.659 | 0.671 | 0.666 | 0.67  | 0.671 | 0.67  | 0.674 | 0.679 | 0.674 |
| Federated States of Micronesia | 0.596 | 0.603 | 0.608 | 0.613 | 0.616 | 0.619 | 0.618 | 0.627 | 0.627 | 0.627 |
| Georgia                        | 0.728 | 0.731 | 0.735 | 0.741 | 0.75  | 0.757 | 0.765 | 0.771 | 0.776 | 0.78  |
| Ghana                          | 0.542 | 0.547 | 0.554 | 0.563 | 0.57  | 0.577 | 0.576 | 0.585 | 0.588 | 0.592 |
| Honduras                       | 0.59  | 0.591 | 0.596 | 0.598 | 0.597 | 0.6   | 0.603 | 0.609 | 0.614 | 0.617 |
| India                          | 0.564 | 0.57  | 0.581 | 0.591 | 0.6   | 0.607 | 0.618 | 0.627 | 0.636 | 0.64  |
| Indonesia                      | 0.646 | 0.656 | 0.661 | 0.669 | 0.675 | 0.681 | 0.683 | 0.686 | 0.691 | 0.694 |
| Kenya                          | 0.523 | 0.533 | 0.543 | 0.552 | 0.559 | 0.566 | 0.572 | 0.578 | 0.585 | 0.59  |
| Kiribati                       | 0.585 | 0.584 | 0.59  | 0.59  | 0.598 | 0.609 | 0.616 | 0.621 | 0.61  | 0.612 |
| Kyrgyzstan                     | 0.631 | 0.636 | 0.636 | 0.639 | 0.649 | 0.658 | 0.663 | 0.666 | 0.669 | 0.672 |
| Laos                           | 0.529 | 0.539 | 0.546 | 0.558 | 0.569 | 0.579 | 0.586 | 0.593 | 0.598 | 0.601 |
| Lesotho                        | 0.48  | 0.489 | 0.493 | 0.498 | 0.505 | 0.505 | 0.509 | 0.511 | 0.516 | 0.52  |
| Mauritania                     | 0.476 | 0.484 | 0.487 | 0.49  | 0.499 | 0.508 | 0.514 | 0.514 | 0.516 | 0.52  |
| Moldova                        | 0.666 | 0.662 | 0.67  | 0.677 | 0.684 | 0.693 | 0.696 | 0.693 | 0.697 | 0.7   |
| Mongolia                       | 0.683 | 0.689 | 0.697 | 0.711 | 0.72  | 0.729 | 0.734 | 0.737 | 0.743 | 0.741 |
| Morocco                        | 0.602 | 0.608 | 0.616 | 0.626 | 0.635 | 0.645 | 0.65  | 0.655 | 0.662 | 0.667 |
| Myanmar                        | 0.509 | 0.519 | 0.53  | 0.54  | 0.549 | 0.558 | 0.564 | 0.569 | 0.574 | 0.578 |
| Nicaragua                      | 0.614 | 0.615 | 0.621 | 0.627 | 0.633 | 0.639 | 0.649 | 0.652 | 0.657 | 0.658 |
| Nigeria                        | 0.485 | 0.49  | 0.484 | 0.494 | 0.512 | 0.519 | 0.524 | 0.527 | 0.53  | 0.532 |
| Pakistan                       | 0.515 | 0.522 | 0.526 | 0.53  | 0.535 | 0.538 | 0.548 | 0.551 | 0.56  | 0.562 |
| Papua New Guinea               | 0.503 | 0.51  | 0.52  | 0.529 | 0.53  | 0.534 | 0.536 | 0.542 | 0.543 | 0.544 |

|                       |       |       |       |       |       |       |       |       |       |       |
|-----------------------|-------|-------|-------|-------|-------|-------|-------|-------|-------|-------|
| Philippines           | 0.661 | 0.659 | 0.665 | 0.67  | 0.677 | 0.685 | 0.689 | 0.693 | 0.696 | 0.699 |
| Sao Tome and Principe | 0.53  | 0.538 | 0.542 | 0.548 | 0.551 | 0.56  | 0.567 | 0.58  | 0.584 | 0.589 |
| Solomon Islands       | 0.504 | 0.497 | 0.507 | 0.514 | 0.529 | 0.539 | 0.539 | 0.546 | 0.543 | 0.546 |
| Sri Lanka             | 0.738 | 0.74  | 0.745 | 0.751 | 0.757 | 0.759 | 0.763 | 0.766 | 0.768 | 0.77  |
| Sudan                 | 0.463 | 0.468 | 0.47  | 0.474 | 0.485 | 0.475 | 0.492 | 0.497 | 0.499 | 0.502 |
| Timor-Leste           | 0.599 | 0.61  | 0.619 | 0.624 | 0.599 | 0.614 | 0.61  | 0.63  | 0.631 | 0.625 |
| Tunisia               | 0.707 | 0.71  | 0.716 | 0.718 | 0.719 | 0.723 | 0.725 | 0.728 | 0.732 | 0.735 |
| Ukraine               | 0.733 | 0.727 | 0.733 | 0.738 | 0.743 | 0.745 | 0.748 | 0.743 | 0.746 | 0.751 |
| Uzbekistan            | 0.653 | 0.659 | 0.666 | 0.674 | 0.683 | 0.69  | 0.695 | 0.698 | 0.703 | 0.71  |
| Vanuatu               | 0.589 | 0.59  | 0.591 | 0.592 | 0.592 | 0.597 | 0.598 | 0.599 | 0.6   | 0.603 |
| Vietnam               | 0.64  | 0.656 | 0.654 | 0.664 | 0.67  | 0.675 | 0.678 | 0.684 | 0.689 | 0.694 |
| Zambia                | 0.517 | 0.533 | 0.544 | 0.556 | 0.569 | 0.574 | 0.58  | 0.583 | 0.586 | 0.588 |

## Human Development Index- Low Income countries (2008-2017)

| Country name                 | 2008  | 2009  | 2010  | 2011  | 2012  | 2013  | 2014  | 2015  | 2016  | 2017  |
|------------------------------|-------|-------|-------|-------|-------|-------|-------|-------|-------|-------|
| Afghanistan                  | 0.437 | 0.453 | 0.463 | 0.471 | 0.482 | 0.487 | 0.491 | 0.493 | 0.494 | 0.498 |
| Benin                        | 0.462 | 0.468 | 0.473 | 0.479 | 0.489 | 0.5   | 0.505 | 0.508 | 0.512 | 0.515 |
| Burkina Faso                 | 0.357 | 0.366 | 0.375 | 0.385 | 0.394 | 0.401 | 0.405 | 0.412 | 0.42  | 0.423 |
| Burundi                      | 0.372 | 0.387 | 0.395 | 0.403 | 0.408 | 0.414 | 0.421 | 0.418 | 0.418 | 0.417 |
| Central African Republic     | 0.337 | 0.343 | 0.351 | 0.358 | 0.365 | 0.344 | 0.349 | 0.357 | 0.362 | 0.367 |
| Chad                         | 0.348 | 0.363 | 0.371 | 0.382 | 0.391 | 0.397 | 0.403 | 0.407 | 0.405 | 0.404 |
| Comoros                      | 0.47  | 0.476 | 0.482 | 0.487 | 0.493 | 0.499 | 0.501 | 0.502 | 0.502 | 0.503 |
| Democratic Republic of Congo | 0.39  | 0.397 | 0.407 | 0.415 | 0.42  | 0.426 | 0.436 | 0.444 | 0.452 | 0.457 |
| Eritrea                      | 0.407 | 0.416 | 0.416 | 0.417 | 0.422 | 0.425 | 0.428 | 0.433 | 0.436 | 0.44  |
| Ethiopia                     | 0.394 | 0.401 | 0.412 | 0.423 | 0.43  | 0.438 | 0.445 | 0.451 | 0.457 | 0.463 |
| Guinea                       | 0.396 | 0.399 | 0.404 | 0.418 | 0.428 | 0.435 | 0.44  | 0.443 | 0.449 | 0.459 |
| Guinea-Bissau                | 0.415 | 0.421 | 0.426 | 0.435 | 0.437 | 0.44  | 0.445 | 0.449 | 0.453 | 0.455 |
| Haiti                        | 0.466 | 0.47  | 0.47  | 0.477 | 0.481 | 0.486 | 0.49  | 0.493 | 0.496 | 0.498 |
| Liberia                      | 0.399 | 0.404 | 0.407 | 0.417 | 0.42  | 0.429 | 0.431 | 0.432 | 0.432 | 0.435 |
| Madagascar                   | 0.5   | 0.503 | 0.504 | 0.504 | 0.507 | 0.509 | 0.512 | 0.514 | 0.517 | 0.519 |
| Malawi                       | 0.417 | 0.431 | 0.441 | 0.45  | 0.455 | 0.461 | 0.468 | 0.47  | 0.474 | 0.477 |
| Mali                         | 0.39  | 0.398 | 0.403 | 0.408 | 0.408 | 0.408 | 0.414 | 0.418 | 0.421 | 0.427 |
| Mozambique                   | 0.388 | 0.397 | 0.403 | 0.407 | 0.412 | 0.423 | 0.427 | 0.432 | 0.435 | 0.437 |
| Nepal                        | 0.502 | 0.514 | 0.529 | 0.535 | 0.548 | 0.554 | 0.56  | 0.566 | 0.569 | 0.574 |
| Niger                        | 0.303 | 0.308 | 0.318 | 0.325 | 0.336 | 0.34  | 0.345 | 0.347 | 0.351 | 0.354 |
| North Korea                  | 0.874 | 0.869 | 0.884 | 0.888 | 0.89  | 0.893 | 0.896 | 0.898 | 0.9   | 0.903 |
| Rwanda                       | 0.455 | 0.47  | 0.485 | 0.493 | 0.5   | 0.503 | 0.509 | 0.51  | 0.52  | 0.524 |
| Senegal                      | 0.445 | 0.449 | 0.456 | 0.467 | 0.476 | 0.481 | 0.486 | 0.492 | 0.499 | 0.505 |
| Sierra Leone                 | 0.373 | 0.381 | 0.385 | 0.392 | 0.407 | 0.419 | 0.423 | 0.413 | 0.413 | 0.419 |
| South Sudan                  |       |       | 0.413 | 0.416 | 0.388 | 0.392 | 0.397 | 0.399 | 0.394 | 0.388 |
| Syria                        | 0.646 | 0.648 | 0.644 | 0.642 | 0.631 | 0.572 | 0.55  | 0.538 | 0.536 | 0.536 |
| Tajikistan                   | 0.618 | 0.62  | 0.634 | 0.637 | 0.642 | 0.646 | 0.645 | 0.645 | 0.647 | 0.65  |
| Tanzania                     | 0.477 | 0.486 | 0.493 | 0.499 | 0.506 | 0.507 | 0.515 | 0.528 | 0.533 | 0.538 |
| The Gambia                   | 0.435 | 0.438 | 0.441 | 0.44  | 0.445 | 0.453 | 0.454 | 0.457 | 0.457 | 0.46  |
| Togo                         | 0.44  | 0.449 | 0.456 | 0.463 | 0.466 | 0.472 | 0.481 | 0.495 | 0.5   | 0.503 |
| Uganda                       | 0.47  | 0.477 | 0.486 | 0.49  | 0.492 | 0.496 | 0.5   | 0.505 | 0.508 | 0.516 |
| Yemen                        | 0.485 | 0.491 | 0.498 | 0.499 | 0.505 | 0.507 | 0.505 | 0.483 | 0.462 | 0.452 |

|          |       |      |       |       |       |       |       |       |       |       |
|----------|-------|------|-------|-------|-------|-------|-------|-------|-------|-------|
| Zimbabwe | 0.439 | 0.45 | 0.467 | 0.478 | 0.505 | 0.516 | 0.525 | 0.529 | 0.532 | 0.535 |
|----------|-------|------|-------|-------|-------|-------|-------|-------|-------|-------|
